# Supplementary material
Source: ML conference proceedings conference paper supplement (https://openreview.net/forum?id=bN1ZBSOV2f)
Supplement: supplementary_material [file attachment]

## Appendix

### A Regression-based Independence Testing

Regression-based independence tests represent an alternative to classification-based approaches in settings where a data stream  $((X_t, Y_t))_{t \geq 1}$  may be processed directly as feature-response pairs. Suppose that one selects a functional class  $\mathcal{G} : \mathcal{X} \rightarrow \mathcal{Y}$  for performing such prediction task, and let  $\ell$  denote a loss function that evaluates the quality of predictions. For example, if  $(Y_t)_{t \geq 1}$  is a sequence of univariate random variables, one can use the squared loss:  $\ell(g(x), y) = (g(x) - y)^2$ , or the absolute loss:  $\ell(g(x), y) = |g(x) - y|$ .

Such tests rely on the following idea: if the alternative  $H_1$  in (2b) is true and a sequence of sequentially updated predictors  $(g_t)_{t \geq 1}$  has nontrivial predictive power, then the losses on random instances drawn from the joint distribution  $P_{XY}$  are expected to be less on average than the losses on random instances from  $P_X \times P_Y$ . For the  $t$ -th pair of points from  $P_{XY}$ , we can label the losses of  $g_t$  on all possible  $(X, Y)$ -pairs as

$$\begin{aligned} L_{2t-1} &= \ell(g_t(\mathbf{X}_{2t-1}, \mathbf{Y}_{2t-1})), & L_{2t} &= \ell(g_t(\mathbf{X}_{2t}, \mathbf{Y}_{2t})), \\ L'_{2t-1} &= \ell(g_t(\mathbf{X}_{2t-1}, \mathbf{Y}_{2t})), & L'_{2t} &= \ell(g_t(\mathbf{X}_{2t}, \mathbf{Y}_{2t-1})). \end{aligned} \quad (25)$$

One can view this problem as sequential two-sample testing under distribution drift (due to incremental learning of  $(g_t)_{t \geq 1}$ ). Hence, one may use either Seq-C-2ST from Section 2 or sequential kernelized 2ST of Shekhar and Ramdas [2021] on the resulting sequence of the losses on observations from  $P_{XY}$  and  $P_X \times P_Y$ . In what follows, we analyze a direct approach where testing is performed by comparing the losses on instances drawn from the two distributions. A critical difference with a construction of Seq-C-2ST is that to design a valid betting strategy one has to ensure that the payoff functions are lower bounded by negative one.

#### A.1 Proxy Regression-based Independence Test

To avoid cases when some expected values are not well-defined, we assume for simplicity that  $\mathcal{X}$  is a bounded subset of  $\mathbb{R}^d$  for some  $d \geq 1$ :  $\mathcal{X} = \{x \in \mathbb{R}^d : \|x\|_2 \leq B_1\}$  for some  $B_1 > 0$ . Similarly, we assume that  $\mathcal{Y}$  is a bounded subset of  $\mathbb{R}$ :  $\mathcal{Y} = \{y \in \mathbb{R} : |y| \leq B_2\}$  for some  $B_2 > 0$ . We note that the construction of the regression-based IT will not require explicit knowledge of constants  $B_1$  and  $B_2$ . First, we consider a setting where an instance either from the joint distribution or an instance from the product of the marginal distributions is observed at each round.

**Definition 3** (Proxy Setting). Suppose that we observe a stream of i.i.d. observations  $((X_t, Y_t, W_t))_{t \geq 1}$ , where  $W_t \sim \text{Rademacher}(1/2)$ , the distribution of  $(X_t, Y_t) \mid W_t = +1$  is  $P_X \times P_Y$ , and that of  $(X_t, Y_t) \mid W_t = -1$  is  $P_{XY}$ . The goal is to design a test for the following pair of hypotheses:

$$H_0 : P_{XY} = P_X \times P_Y, \quad (26a)$$

$$H_1 : P_{XY} \neq P_X \times P_Y. \quad (26b)$$

**Oracle Proxy Sequential Regression-based IT.** To construct an oracle test, we assume having access to the oracle predictor  $g_* : \mathcal{X} \rightarrow \mathcal{Y}$ , e.g., the minimizer of the squared risk is  $g_*(x) = \mathbb{E}[Y \mid X = x]$ . Formalizing the above intuition, we use  $\mathbb{E}[W\ell(g_*(X), Y)]$  as a natural way for measuring dependence between  $X$  and  $Y$ . To enforce boundedness of the payoff functions, we use ideas of the tests for symmetry from [Ramdas et al., 2020, Shekhar and Ramdas, 2021, Podkopaev et al., 2023, Shaer et al., 2023], namely we use a composition with an odd function:

$$f_*^r(X_t, Y_t, W_t) = \tanh(s_* \cdot W_t \cdot \ell(g_*(X_t), Y_t)) \in [-1, 1], \quad (27)$$

where  $s_* > 0$  is an appropriately selected scaling factor<sup>3</sup>. Since under  $H_0$  in (26a),  $s_* \cdot W_t \cdot \ell(g_*(X_t), Y_t)$  is a random variable that is symmetric around zero, it follows that  $\mathbb{E}[f_*^r(X_t, Y_t, W_t)] =$

<sup>3</sup>We note that rescaling is important for arguing about consistency and not the type I error control.

0, and, using the argument analogous to the proof of Theorem 1, we can easily deduce that a sequential IT based on  $f_\star^r$  controls the type I error control. The scaling factor  $s_\star$  is selected in a way that guarantees that, if  $H_1$  in (26b) is true and if  $\mathbb{E}[W\ell(g_\star(X), Y)] > 0$ , then  $\mathbb{E}[f_\star^r(X, Y, W)] > 0$ , which is a sufficient condition for consistency of the oracle test. In particular, we show that it suffices to consider:

$$s_\star = \sqrt{\frac{2\mu_\star}{\nu_\star}}, \quad (28a)$$

$$\text{where } \mu_\star = \mathbb{E}[W\ell(g_\star(X), Y)], \quad (28b)$$

$$\nu_\star = \mathbb{E}\left[(1 + W)(\ell(g_\star(X), Y))^3\right]. \quad (28c)$$

Without loss of generality, we assume that  $\nu_\star$  is bounded away from zero (which is a very mild assumption since  $\nu_\star$  essentially corresponds to a cubic risk of  $g_\star$  on data drawn from the product of the marginal distributions  $P_X \times P_Y$ ). Let the *oracle* regression-based wealth process  $(\mathcal{K}_t^{r,\star})_{t \geq 0}$  be defined by using the payoff function (27) with a scaling factor defined in (28a), along with a predictable sequence of betting fractions  $(\lambda_t)_{t \geq 1}$  selected via the ONS strategy (Algorithm 1). We have the following result about the oracle regression-based IT, whose proof is deferred to Appendix D.4.

**Theorem 3.** *The following claims hold for the oracle sequential regression-based IT based on  $(\mathcal{K}_t^{r,\star})_{t \geq 0}$ :*

1. Suppose that  $H_0$  in (26a) is true. Then the test ever stops with probability at most  $\alpha$ :  $\mathbb{P}_{H_1}(\tau < \infty) \leq \alpha$ .
2. Suppose that  $H_1$  in (26b) is true. Further, suppose that:  $\mathbb{E}[W\ell(g_\star(X), Y)] > 0$ . Then the test is consistent:  $\mathbb{P}_{H_1}(\tau < \infty) = 1$ .

**Practical Proxy Sequential Regression-based IT.** To construct a practical test, we use a sequence of predictors  $(g_t)_{t \geq 1}$  that are updated sequentially as more data are observed. We write  $\mathcal{A}_r : (\cup_{t \geq 1} (\mathcal{X} \times \mathcal{Y})^t) \times \mathcal{G} \rightarrow \mathcal{G}$  to denote a chosen regressor learning algorithm which maps a training dataset of any size and previously used predictor, to an updated predictor. We start with  $\mathcal{D}_0 = \emptyset$  and some initial guess  $g_1 \in \mathcal{G}$ . At round  $t$ , we use the payoff function:

$$f_t^r(X_t, Y_t, W_t) = \tanh(s_t \cdot W_t \cdot \ell(g_t(X_t), Y_t)). \quad (29)$$

where a sequence of predictable scaling factors  $(s_t)_{t \geq 1}$  is defined as follows: we set  $s_0 = 0$  and define:

$$s_t = \sqrt{\frac{2\mu_t}{\nu_t}}, \quad (30a)$$

$$\text{where } \mu_t = \left( \frac{1}{t-1} \sum_{i=1}^{t-1} W_i \cdot \ell(g_i(X_i), Y_i) \right) \vee 0, \quad (30b)$$

$$\nu_t = \frac{1}{t-1} \sum_{i=1}^{t-1} (1 + W_i) \cdot (\ell(g_i(X_i), Y_i))^3. \quad (30c)$$

After  $(X_t, Y_t, W_t)$  has been used for betting, we update a training dataset:  $\mathcal{D}_t = \mathcal{D}_{t-1} \cup \{(X_t, Y_t, W_t)\}$ , and an existing predictor:  $g_{t+1} = \mathcal{A}_r(\mathcal{D}_t, g_t)$ . We summarize this practical sequential 2ST in Algorithm 3.

For simplicity, we consider a class of functions  $\mathcal{G} := \{g_\theta : \mathcal{X} \rightarrow \mathcal{Y}, \theta \in \Theta\}$  for some parameter set  $\Theta$  which we assume to be a subset of a metric space. In this case, a sequence of predictors  $(g_t)_{t \geq 1}$  is associated with the corresponding sequence of parameters  $(\theta_t)_{t \geq 1}$ : for  $t \geq 1$ ,  $g_t(\cdot) = g(\cdot; \theta_t)$  for some  $\theta_t \in \Theta$ . To argue about the consistency of the resulting test, we make two assumptions.

**Assumption 3 (Smoothness).** We assume that:

- Predictors in  $\mathcal{G}$  are  $L_1$ -Lipschitz smooth:

$$\sup_{x \in \mathcal{X}} |g(x; \theta) - g(x; \theta')| \leq L_1 \|\theta - \theta'\|, \quad \forall \theta, \theta' \in \Theta. \quad (31)$$

---

**Algorithm 3** Proxy Sequential Regression-based IT

---

**Input:** significance level  $\alpha \in (0, 1)$ , data stream  $((X_t, Y_t, W_t))_{t \geq 1}$ ,  $g_1(z) \equiv 0$ ,  $\mathcal{A}_r$ ,  $\mathcal{D}_0 = \emptyset$ ,  $\lambda_1^{\text{ONS}} = 0$ ,  $s_1 = 0$ .  
**for**  $t = 1, 2, \dots$  **do**  
    Evaluate the payoff  $f_t^r(X_t, Y_t, W_t)$  as in (29);  
    Using  $\lambda_t^{\text{ONS}}$ , update the wealth process  $\mathcal{K}_t^r$  as in (5);  
    **if**  $\mathcal{K}_t^r \geq 1/\alpha$  **then**  
        Reject  $H_0$  and stop;  
    **else**  
        Update the training dataset:  $\mathcal{D}_t := \mathcal{D}_{t-1} \cup \{(X_t, Y_t)\}$ ;  
        Update predictor:  $g_{t+1} = \mathcal{A}_r(\mathcal{D}_t, g_t)$ ;  
        Compute  $s_{t+1}$  as in (30a);  
        Compute  $\lambda_{t+1}^{\text{ONS}}$  (Algorithm 1) using  $f_t^r(X_t, Y_t, W_t)$ ;

---

- 432 • The loss function  $\ell$  is  $L_2$ -Lipschitz smooth:

$$\sup_{\substack{x \in \mathcal{X} \\ y \in \mathcal{Y}}} |\ell(g(x; \theta), y) - \ell(g(x; \theta'), y)| \leq L_2 \sup_{x \in \mathcal{X}} |g(x; \theta) - g(x; \theta')|, \quad \forall \theta, \theta' \in \Theta. \quad (32)$$

433 In words, Assumption (31) states that the outputs of predictors, whose parameters are close, will  
434 also be close. Assumption (32) states that the losses of two predictors, whose outputs are close,  
435 will also be close. For example, if  $\mathcal{G}$  is a class of linear predictors:  $g_\theta(x) = \theta^\top x$ ,  $x \in \mathcal{X}$ , then  
436 Assumption 3 will be trivially satisfied for the squared and the absolute losses if  $\mathcal{X}$  and  $\mathcal{Y}$  are bounded.  
437 Note that we do not need an explicit knowledge of  $L_1$  or  $L_2$  for designing a test. Second, we make a  
438 *learnability* assumption about algorithm  $\mathcal{A}_r$ .

439 **Assumption 4** (Learnability). Suppose that  $H_1$  in (26b) is true. We assume that the regressor  
440 learning algorithm  $\mathcal{A}_r$  is such that for the resulting sequence of parameters  $(\theta_t)_{t \geq 1}$ , it holds that  
441  $\theta_t \xrightarrow{\text{a.s.}} \theta_*$ , where  $\theta_*$  is a random variable taking values in  $\Theta$  and  $\mathbb{E}[W\ell(g(X; \theta_*), Y) \mid \theta_*] \stackrel{\text{a.s.}}{>} 0$ ,  
442 where  $(X, Y, W) \perp\!\!\!\perp \theta_*$ .

443 We conclude with the following result for the practical proxy sequential regression-based IT, whose  
444 proof is deferred to Appendix D.4.

445 **Theorem 4.** *The following claims hold for the proxy sequential regression-based IT (Algorithm 3):*

- 446 1. Suppose that  $H_0$  in (26a) is true. Then the test ever stops with probability at most  $\alpha$ :  
447  $\mathbb{P}_{H_0}(\tau < \infty) \leq \alpha$ .  
448 2. Suppose that  $H_1$  in (26b) is true. Further, suppose that Assumptions 3 and 4 are satisfied.  
449 Then the test is consistent:  $\mathbb{P}_{H_1}(\tau < \infty) = 1$ .

450 **Sequential Regression-based Independence Test (Seq-R-IT).** Next, we instantiate this test  
451 for the sequential independence testing setting (as per Definition 2) where we observe sequence  
452  $((X_t, Y_t))_{t \geq 1}$ , where  $(X_t, Y_t) \stackrel{\text{iid}}{\sim} P_{XY}$ ,  $t \geq 1$ . Analogous to Section 3, we bet on the outcome of  
453 two observations drawn from the joint distribution  $P_{XY}$ . To proceed, we derandomize the payoff  
454 function (29) and consider

$$\begin{aligned} f_t^r((X_{2t-1}, Y_{2t-1}), (X_{2t}, Y_{2t})) &= \frac{1}{4} (\tanh(s_t \cdot \ell(g_t(X_{2t-1}), Y_{2t})) + \tanh(s_t \cdot \ell(g_t(X_{2t}), Y_{2t-1}))) \\ &\quad - \frac{1}{4} (\tanh(s_t \cdot \ell(g_t(X_{2t}), Y_{2t})) - \tanh(s_t \cdot \ell(g_t(X_{2t-1}), Y_{2t-1}))). \end{aligned} \quad (33)$$

455 After betting on the outcome of the  $t$ -th pair of observations from  $P_{XY}$ , we update a training dataset:

$$\mathcal{D}_t = \mathcal{D}_{t-1} \cup \{(X_{2t-1}, Y_{2t-1}), (X_{2t}, Y_{2t})\},$$

456 and a predictive model:  $\hat{g}_{t+1} = \mathcal{A}_r(\mathcal{D}_t, \hat{g}_t)$ .

## 457 A.2 Synthetic Experiments

458 To evaluate the performance of Seq-R-IT, we consider the *Gaussian linear model*. Let  $(X_t)_{t \geq 1}$  and  
 459  $(\varepsilon_t)_{t \geq 1}$  denote two independent sequences of i.i.d. standard Gaussian random variables. For  $t \geq 1$ ,  
 460 we take

$$(X_t, Y_t) = (X_t, X_t\beta + \varepsilon_t),$$

461 where  $\beta \neq 0$  implies nonzero linear correlation (hence dependence). We consider 20 values of  $\beta$   
 462 equally spaced in  $[0, 1/2]$ . For the comparison, we use:

463 1. *Seq-R-IT with ridge regression*. We use ridge regression as an underlying model:  $\hat{g}_t(x) =$   
 464  $\beta_0^{(t)} + x\beta_1^{(t)}$ , where

$$(\beta_0^{(t)}, \beta_1^{(t)}) = \arg \min_{\beta_0, \beta_1} \sum_{i=1}^{2(t-1)} (Y_i - X_i\beta_1 - \beta_0)^2 + \lambda\beta_1^2.$$

465 2. *Seq-C-IT with QDA*. Note that  $P_{XY} = \mathcal{N}(\mu, \Sigma^+)$  and  $P_X \times P_Y = \mathcal{N}(\mu, \Sigma^-)$ , where

$$\mu = \begin{pmatrix} 0 \\ 0 \end{pmatrix}, \quad \Sigma^+ = \begin{pmatrix} 1 & \beta \\ \beta & 1 + \beta^2 \end{pmatrix}, \quad \Sigma^- = \begin{pmatrix} 1 & 0 \\ 0 & 1 + \beta^2 \end{pmatrix}.$$

466 For this problem, an oracle predictor which minimizes the misclassification risk is

$$g^*(x, y) = \frac{\varphi((x, y); \mu^+, \Sigma^+) - \varphi((x, y); \mu^-, \Sigma^-)}{\varphi((x, y); \mu^-, \Sigma^-) + \varphi((x, y); \mu^+, \Sigma^+)} \in [-1, 1], \quad (34)$$

467 where  $\varphi((x, y); \mu, \Sigma)$  denotes the density of the Gaussian distribution  $\mathcal{N}(\mu, \Sigma)$  evaluated at  
 468  $(x, y)$ . Recall that  $\mathcal{D}_{t-1} = \{(Z_i, +1)\}_{i \leq 2(t-1)} \cup \{(Z'_i, -1)\}_{i \leq 2(t-1)}$  denotes the training  
 469 dataset that is available at round  $t$  for training a predictor  $\hat{g}_t : \mathcal{X} \times \mathcal{Y} \rightarrow [-1, 1]$ . We  
 470 deploy Seq-C-IT with an estimator  $\hat{g}_t$  of (34), obtained by using plug-in estimates of  
 471  $\mu^+, \Sigma^+, \mu^-, \Sigma^-$ , computed from  $\mathcal{D}_{t-1}$ :

$$\hat{\mu}_t^+ = \frac{1}{2(t-1)} \sum_{Z \in \mathcal{D}_{t-1}^+} Z, \quad \hat{\Sigma}_t^+ = \left( \frac{1}{2(t-1)} \sum_{Z \in \mathcal{D}_{t-1}^+} ZZ^\top \right) - (\hat{\mu}_t^+)(\hat{\mu}_t^+)^\top,$$

472 and  $\hat{\mu}_t^-, \hat{\Sigma}_t^-$  are computed similarly from  $\mathcal{D}_{t-1}^-$ .

473 In addition, we also include HSIC-based SKIT to the comparison and defer the details regarding  
 474 kernel hyperparameters to Appendix E.1. We set the monitoring horizon to  $T = 5000$  points from  
 475  $P_{XY}$  and aggregate the results over 200 sequences of observations for each value of  $\beta$ . We illustrate  
 476 the result in Figure 5: while Seq-R-IT has high power for large values of  $\beta$ , we observe its inferior  
 477 performance against Seq-C-IT (and SKIT) under the harder settings. Improving regression-based  
 478 betting strategies, e.g., designing better scaling factors that still yield a provably consistent test, is an  
 479 open question for future research.

## 480 B Two-sample Testing with Unbalanced Classes

481 In Section 2, we developed a sequential 2ST under the assumption at each round, an instance from  
 482 either  $P$  or  $Q$  is revealed with equal probability. Such assumption was reasonable for designing  
 483 Seq-C-IT, where external randomization produced two instances from  $P_{XY}$  and  $P_X \times P_Y$  at each  
 484 round. Next, we generalize our sequential 2ST to a more general setting of unbalanced classes.

485 **Definition 4** (Sequential two-sample testing with unbalanced classes). Let  $\pi \in (0, 1)$ . Suppose  
 486 that we observe a stream of i.i.d. observations  $((Z_t, W_t))_{t \geq 1}$ , where  $W_t \sim \text{Rademacher}(\pi)$ , the  
 487 distribution of  $Z_t \mid W_t = +1$  is denoted  $P$ , and that of  $Z_t \mid W_t = -1$  is denoted  $Q$ . We set the goal  
 488 of designing a sequential test for the following pair of hypotheses:

$$H_0 : P = Q, \quad (35a)$$

$$H_1 : P \neq Q. \quad (35b)$$

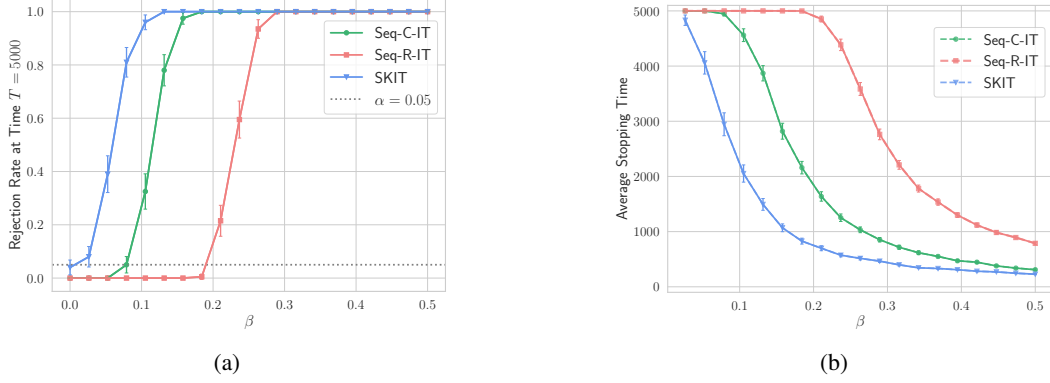

Figure 5: Comparison between Seq-R-IT, Seq-C-IT and HSIC-based SKIT under the Gaussian linear model. Inspecting Figure 5a at  $\beta = 0$  confirms that all tests control the type I error. Non-surprisingly, kernel-based SKIT performs better than predictive tests under this model (no localized dependence). We also observe that Seq-C-IT performs better than Seq-R-IT.

For what follows, we will focus on the payoff based on the squared risk due to its relationship to the likelihood-ratio-based test (Remark 3). In particular, after correcting the likelihood under the null in (20) to account for a general positive class proportion  $\pi$ , we can deduce that (see Appendix D.5):

$$(1 - \lambda_t) \cdot 1 + \lambda_t \cdot \frac{(\eta_t(Z_t))^{\mathbb{1}\{W_t=1\}} (1 - \eta_t(Z_t))^{\mathbb{1}\{W_t=0\}}}{(\pi)^{\mathbb{1}\{W_t=1\}} (1 - \pi)^{\mathbb{1}\{W_t=0\}}} = 1 + \lambda_t \cdot \frac{W_t (g_t(Z_t) - (2\pi - 1))}{1 + W_t(2\pi - 1)}, \quad (36)$$

where  $\eta_t(z) = (g_t(z) + 1)/2$ , and hence, a natural payoff function for the case with unbalanced classes is

$$f_t^u(Z_t, W_t) = \frac{W_t (g_t(Z_t) - (2\pi - 1))}{1 + W_t(2\pi - 1)}. \quad (37)$$

Note that the payoff for the balanced case (22b) is recovered by setting  $\pi = 1/2$ . It is easy to check that (see Appendix D.5): (a)  $f_t^u(z, w) \geq -1$  for any  $(z, w) \in \mathcal{Z} \times \{-1, 1\}$ , and (b) if  $H_0$  in (35a) is true, then  $\mathbb{E}_{H_0} [f_t^u(Z_t, W_t) | \mathcal{F}_{t-1}] = 0$ , where  $\mathcal{F}_{t-1} = \sigma(\{(Z_i, W_i)\}_{i \leq t-1})$ . This in turn implies that a wealth process that relies on the payoff function  $f_t^u$  in (37) is a nonnegative martingale, and hence, the corresponding sequential 2ST is valid. However, the positive class proportion  $\pi$ , needed to use the payoff function (37), is generally unknown beforehand. First, let us consider the case when  $\lambda_t = 1$ ,  $t \geq 1$ . In this case, the wealth of a gambler that uses the payoff function (37) after round  $t$  is

$$\mathcal{K}_t = \frac{\prod_{i=1}^t (\eta_i(Z_i))^{\mathbb{1}\{W_i=1\}} (1 - \eta_i(Z_i))^{\mathbb{1}\{W_i=0\}}}{\prod_{i=1}^t \pi^{\mathbb{1}\{W_i=1\}} (1 - \pi)^{\mathbb{1}\{W_i=0\}}}. \quad (38)$$

Note that:

$$\hat{\pi}_t := \frac{1}{t} \sum_{i=1}^t \mathbb{1}\{W_i = 1\} = \arg \max_{\pi \in [0,1]} \left( \prod_{i=1}^t \pi^{\mathbb{1}\{W_i=1\}} (1 - \pi)^{\mathbb{1}\{W_i=0\}} \right),$$

is the MLE for  $\pi$  computed from  $\{W_i\}_{i \leq t}$ . In particular, if we consider a process  $(\tilde{\mathcal{K}}_t)_{t \geq 0}$ , where

$$\tilde{\mathcal{K}}_t := \frac{\prod_{i=1}^t (\eta_i(Z_i))^{\mathbb{1}\{W_i=1\}} (1 - \eta_i(Z_i))^{\mathbb{1}\{W_i=0\}}}{\prod_{i=1}^t (\hat{\pi}_t)^{\mathbb{1}\{W_i=1\}} (1 - \hat{\pi}_t)^{\mathbb{1}\{W_i=0\}}}, \quad t \geq 1,$$

it follows that  $\tilde{\mathcal{K}}_t \leq \mathcal{K}_t$ ,  $\forall t \geq 1$ , meaning that  $(\tilde{\mathcal{K}}_t)_{t \geq 0}$  is a process that is upper bounded by a nonnegative martingale with initial value one. This in turn implies that a test based on  $(\tilde{\mathcal{K}}_t)_{t \geq 0}$  is a valid level- $\alpha$  sequential 2ST for the case of unknown class proportions. This idea underlies the running MLE sequential likelihood ratio test of Wasserman et al. [2020] and has been recently considered in the context of two-sample testing by Pande et al. [2022]. In case of nontrivial betting fractions:  $(\lambda_t)_{t \geq 1}$ , representation of the wealth process (38) no longer holds, and to proceed, we modify the rules of the game and use minibatching. A bet is placed on every  $b$  (say, 5 or 10) observations, meaning

that for a given minibatch size  $b \geq 1$ , at round  $t$  we bet on  $\{(Z_{b(t-1)+i}, W_{b(t-1)+i})\}_{i \in \{1, \dots, b\}}$ . The MLE of  $\pi$  computed from the  $t$ -th minibatch is

$$\hat{\pi}_t = \frac{1}{b} \sum_{i=b(t-1)+1}^{bt} \mathbb{1}\{W_i = +1\}.$$

We consider a payoff function of the following form:

$$f_t^u \left( \{(Z_{b(t-1)+i}, W_{b(t-1)+i})\}_{i \in \{1, \dots, b\}} \right) = \prod_{i=b(t-1)+1}^{bt} \left( \frac{1 + W_i g_t(Z_i)}{1 + W_i (2\hat{\pi}_t - 1)} \right) - 1. \quad (39)$$

In words, the above payoff essentially compares the performance of a predictor  $g_t$ , trained on  $\{(Z_i, W_i)\}_{i \leq b(t-1)}$  and evaluated on the  $t$ -th minibatch, to that of a trivial baseline predictor to form a bet. In particular, setting  $b = 1$  yields a valid, yet a powerless test. Indeed, we have  $\hat{\pi}_t = \mathbb{1}\{W_t = 1\} = (W_t + 1)/2$ . In this case, the payoff (39) reduces to

$$\frac{W_t (g_t(Z_t) - (2\hat{\pi}_t - 1))}{1 + W_t (2\hat{\pi}_t - 1)} = \frac{W_t g_t(Z_t) - 1}{2} \stackrel{\text{a.s.}}{\in} [-1, 0],$$

implying that the wealth can not grow even if the null is false. Define a wealth processes  $(\mathcal{K}_t^u)_{t \geq 0}$  based on the payoff functions (39) along with a predictable sequence of betting fractions  $(\lambda_t)_{t \geq 1}$  selected via ONS strategy (Algorithm 1). Let  $\mathcal{F}_t = \sigma(\{(Z_i, W_i)\}_{i \leq bt})$  for  $t \geq 1$ , with  $\mathcal{F}_0$  denoting a trivial sigma-algebra. We conclude with the following result, whose proof is deferred to Appendix D.5.

**Theorem 5.** *Suppose that  $H_0$  in (35a) is true. Then  $(\mathcal{K}_t^u)_{t \geq 0}$  is a nonnegative supermartingale adapted to  $(\mathcal{F}_t)_{t \geq 0}$ . Hence, the sequential 2ST based on  $(\mathcal{K}_t^u)_{t \geq 0}$  satisfies:  $\mathbb{P}_{H_0}(\tau < \infty) \leq \alpha$ .*

## C Testing under Distribution Drift

First, we define the problem of two-sample testing when at each round instances from both distributions are observed.

**Definition 5** (Sequential two-sample testing). Suppose that we observe that a stream of observations:  $((X_t, Y_t))_{t \geq 1}$ , where  $(X_t, Y_t) \stackrel{\text{iid}}{\sim} P_X \times P_Y$  for  $t \geq 1$ . The goal is to design a sequential test for

$$H_0 : (X_t, Y_t) \stackrel{\text{iid}}{\sim} P_X \times P_Y \text{ and } P_X = P_Y, \quad (40a)$$

$$H_1 : (X_t, Y_t) \stackrel{\text{iid}}{\sim} P_X \times P_Y \text{ and } P_X \neq P_Y. \quad (40b)$$

Under the two-sample testing setting (Definition 5), we label observations from  $P_Y$  as positive (+1) and observations from  $P_X$  as negative (-1). We write  $\mathcal{A}_c^{2\text{ST}} : (\cup_{t \geq 1} (\mathcal{X} \times \{-1, +1\})^t) \times \mathcal{G} \rightarrow \mathcal{G}$  to denote a chosen learning algorithm which maps a training dataset of any size and previously used predictor, to an updated predictor. We start with  $\mathcal{D}_0 = \emptyset$  and  $g_1 : g_1(x) = 0, \forall x \in \mathcal{X}$ . At round  $t$ , we bet using derandomized versions of the payoffs (22), namely

$$f_t^m(X_t, Y_t) = \frac{1}{2} (\text{sign}[g_t(Y_t)] - \text{sign}[g_t(X_t)]), \quad (41a)$$

$$f_t^s(X_t, Y_t) = \frac{1}{2} (g_t(Y_t) - g_t(X_t)). \quad (41b)$$

After  $(X_t, Y_t)$  has been used for betting, we update a training dataset and an existing predictor:

$$\mathcal{D}_t = \mathcal{D}_{t-1} \cup \{(Y_t, +1), (X_t, -1)\}, \quad g_{t+1} = \mathcal{A}_c^{2\text{ST}}(\mathcal{D}_t, g_t).$$

**Testing under Distribution Drift.** Batch two-sample and independence tests generally rely on either a cutoff computed using the asymptotic null distribution of a chosen test statistic (if tractable) or a permutation p-value. Both approaches require imposing i.i.d. (or exchangeability, for the latter option) assumption about the data distribution, and if the distribution drifts, both approaches fail to guarantee the type I error control. In contrast, Seq-C-2ST and Seq-C-IT remain valid beyond the i.i.d. setting by construction (analogous to tests developed in [Shekhar and Ramdas, 2021, Podkopaev et al., 2023]). First, we define the problems of sequential two-sample and independence testing under distribution drift.

**Definition 6** (Sequential two-sample testing under distribution drift). Suppose that we observe that a stream of independent observations:  $((X_t, Y_t))_{t \geq 1}$ , where  $(X_t, Y_t) \sim P_X^{(t)} \times P_Y^{(t)}$ ,  $t \geq 1$ . The goal is to design a sequential test for the following pair of hypotheses:

$$H_0 : P_X^{(t)} = P_Y^{(t)}, \forall t, \quad (42a)$$

$$H_1 : \exists t' : P_X^{(t')} \neq P_Y^{(t')}. \quad (42b)$$

**Definition 7** (Sequential independence testing under distribution drift). Suppose that we observe that a stream of independent observations from the joint distribution which drifts over time:  $((X_t, Y_t))_{t \geq 1}$ , where  $(X_t, Y_t) \sim P_{XY}^{(t)}$ . The goal is to design a sequential test for the following pair of hypotheses:

$$H_0 : P_{XY}^{(t)} = P_X^{(t)} \times P_Y^{(t)}, \forall t, \quad (43a)$$

$$H_1 : \exists t' : P_{XY}^{(t')} \neq P_X^{(t')} \times P_Y^{(t')}. \quad (43b)$$

The superscripts highlight that, in contrast to the standard i.i.d. setting (Definitions 5 and 2), the underlying distributions may drift over time. For independence testing, we need to impose an additional assumption that enables reasoning about the type I error control of Seq-C-IT.

**Assumption 5.** Consider the setting of independence testing under distribution drift (Definition 7). We assume that for each  $t \geq 1$ , it holds that either  $P_X^{(t-1)} = P_X^{(t)}$  or  $P_Y^{(t-1)} = P_Y^{(t)}$ , meaning that at each step either the distribution of  $X$  changes or that of  $Y$  changes, but not both simultaneously<sup>4</sup>.

We have the following result about the type I error control of our tests under distribution drift.

**Corollary 2.** *The following claims hold:*

1. Suppose that  $H_0$  in (42a) is true. Then Seq-C-2ST satisfies:  $\mathbb{P}_{H_0}(\tau < \infty) \leq \alpha$ .
2. Suppose that  $H_0$  in (43a) is true. Further, suppose that Assumption 5 is satisfied. Then Seq-C-IT satisfies:  $\mathbb{P}_{H_0}(\tau < \infty) \leq \alpha$ .

The above result follows from the fact the payoff functions underlying Seq-C-2ST (41) and Seq-C-IT (23) are valid under the more general null hypotheses (42a) and (43a) respectively. The rest of the proof of Corollary 2 follows the same steps as that of Theorem 2, and we omit the details. We conclude with an example which shows that Assumption 5 is necessary for the type I error control.

**Example 2.** Consider the following case when the null  $H_0$  in (43a) is true, but Assumption 5 is not satisfied. We show that Seq-C-IT fails to control type I error (at any prespecified level  $\alpha \in (0, 1)$ ), and for simplicity, focus on the payoff function based on the squared risk (23). Suppose that we observe a sequence of observations:  $((X_t, Y_t))_{t \geq 1}$ , where  $(X_t, Y_t) = (t + W_t, t + V_t)$  and  $W_t, V_t \stackrel{\text{iid}}{\sim} \text{Bern}(1/2)$ . It suffices to show that there exists a sequence of predictors  $(g_t)_{t \geq 1}$ , for which

$$\liminf_{t \rightarrow \infty} \frac{1}{t} \sum_{i=1}^t f_i^s((X_{2t-1}, Y_{2t-1}), (X_{2t}, Y_{2t})) \stackrel{\text{a.s.}}{>} 0. \quad (44)$$

If (44) holds, then using the same argument as in the proof of Theorem 2, one can then deduce that  $\mathbb{P}(\tau < \infty) = 1$ . Consider the following sequence of predictors  $(g_t)_{t \geq 1}$ :

$$g_t(x, y) = ((x - (2t - \frac{1}{2}))(y - (2t - \frac{1}{2})) \wedge 1) \vee -1.$$

We have:

$$\begin{aligned} g_t(X_{2t}, Y_{2t}) &= ((W_{2t} + \frac{1}{2})(V_{2t} + \frac{1}{2}) \wedge 1) \vee -1, \\ g_t(X_{2t-1}, Y_{2t-1}) &= (W_{2t-1} - \frac{1}{2})(V_{2t-1} - \frac{1}{2}), \\ g_t(X_{2t}, Y_{2t-1}) &= (W_{2t} + \frac{1}{2})(V_{2t-1} - \frac{1}{2}), \\ g_t(X_{2t-1}, Y_{2t}) &= (W_{2t-1} - \frac{1}{2})(V_{2t} + \frac{1}{2}). \end{aligned}$$

Simple calculation shows that:

$\mathbb{E}[g_t(X_{2t}, Y_{2t})] = 11/16$ ,  $\mathbb{E}[g_t(X_{2t-1}, Y_{2t-1})] = \mathbb{E}[g_t(X_{2t}, Y_{2t-1})] = \mathbb{E}[g_t(X_{2t-1}, Y_{2t})] = 0$  and hence, for all  $t \geq 1$ , it holds that  $\mathbb{E}[f_t^s((X_{2t-1}, Y_{2t-1}), (X_{2t}, Y_{2t}))] = 11/64 > 0$ . This in turn implies (44), and hence, we conclude that Seq-C-IT fails to control the type I error.

<sup>4</sup>Technically, a slightly weaker condition suffices — at odd  $t$ , the distribution can change arbitrarily, but at even  $t$ , either the distribution of  $X$  changes or that of  $Y$  changes but not both; however, this weaker condition is slightly less intuitive than the stated condition.

## 574 D Proofs

### 575 D.1 Auxiliary Results

576 **Proposition 2** (Ville's inequality [Ville, 1939]). *Suppose that  $(\mathcal{M}_t)_{t \geq 0}$  is a nonnegative supermartingale process adapted to a filtration  $(\mathcal{F}_t)_{t \geq 0}$ . Then, for any  $a > 0$  it holds that:*

$$\mathbb{P}(\exists t \geq 1 : \mathcal{M}_t \geq a) \leq \frac{\mathbb{E}[\mathcal{M}_0]}{a}.$$

### 578 D.2 Supporting Lemmas

579 **Lemma 6.** *Consider sequential two-sample testing setting (Definition 1). Suppose that a predictor*  
580  *$g \in \mathcal{G}$  satisfies  $\mathbb{E}[f(Z, W)] > 0$ , where  $f(z, w) := wg(z)$ .*

581 (a) *Consider the wealth process  $(\mathcal{K}_t)_{t \geq 0}$  based on  $f$  along with the ONS strategy for selecting*  
582 *betting fractions (Algorithm 1). Then we have the following lower bound on the growth rate*  
583 *of the wealth process:*

$$\liminf_{t \rightarrow \infty} \frac{\log \mathcal{K}_t}{t} \stackrel{\text{a.s.}}{\geq} \frac{1}{4} \left( \frac{(\mathbb{E}[f(Z, W)])^2}{\mathbb{E}[f^2(Z, W)]} \wedge \mathbb{E}[f(Z, W)] \right). \quad (45)$$

584 (b) *For  $\lambda_\star = \arg \max_{\lambda \in [-0.5, 0.5]} \mathbb{E}[\log(1 + \lambda f(Z, W))]$ , it holds that:*

$$\mathbb{E}[\log(1 + \lambda_\star f(Z, W))] \leq \frac{4}{3} \cdot \frac{(\mathbb{E}[f(Z, W)])^2}{\mathbb{E}[(f(Z, W))^2]} \wedge \frac{\mathbb{E}[f(Z, W)]}{2}. \quad (46)$$

585 *Analogous result holds when the payoff function  $f(z, w) := w \cdot \text{sign}[g(z)]$  is used instead.*

586 *Proof.* (a) Under the ONS betting strategy, for any sequence of outcomes  $(f_t)_{t \geq 1}$ ,  $f_t \in [-1, 1]$ ,  
587 it holds that (see the proof of Theorem 1 in [Cutkosky and Orabona, 2018]):

$$\log \mathcal{K}_t(\lambda_0) - \log \mathcal{K}_t = O \left( \log \left( \sum_{i=1}^t f_i^2 \right) \right), \quad (47)$$

588 where  $\mathcal{K}_t(\lambda_0)$  is the wealth of any constant betting strategy  $\lambda_0 \in [-1/2, 1/2]$  and  $\mathcal{K}_t$  is the  
589 wealth corresponding to the ONS betting strategy. Hence, it follows that

$$\frac{\log \mathcal{K}_t}{t} \geq \frac{\log \mathcal{K}_t(\lambda_0)}{t} - C \cdot \frac{\log t}{t}, \quad (48)$$

590 for some absolute constant  $C > 0$ . Next, consider

$$\lambda_0 = \frac{1}{2} \left( \left( \frac{\sum_{i=1}^t f_i}{\sum_{i=1}^t f_i^2} \wedge 1 \right) \vee 0 \right).$$

591 We obtain:

$$\begin{aligned} \frac{\log \mathcal{K}_t(\lambda_0)}{t} &= \frac{1}{t} \sum_{i=1}^t \log(1 + \lambda_0 f_i) \\ &\stackrel{(a)}{\geq} \frac{1}{t} \sum_{i=1}^t (\lambda_0 f_i - \lambda_0^2 f_i^2) \\ &= \left( \frac{\frac{1}{t} \sum_{i=1}^t f_i}{4} \vee 0 \right) \cdot \left( \frac{\frac{1}{t} \sum_{i=1}^t f_i}{\frac{1}{t} \sum_{i=1}^t f_i^2} \wedge 1 \right), \end{aligned} \quad (49)$$



where in (a) we used that  $\log(1+x) \geq x - x^2$  for  $x \in [-1/2, 1/2]$ . From (48), it then follows that:

$$\begin{aligned} \liminf_{t \rightarrow \infty} \frac{\log \mathcal{K}_t}{t} &\stackrel{\text{a.s.}}{\geq} \left( \frac{\mathbb{E}[f(Z, W)]}{4} \vee 0 \right) \cdot \left( \frac{\mathbb{E}[f(Z, W)]}{\mathbb{E}[f^2(Z, W)]} \wedge 1 \right) \\ &= \frac{1}{4} \left( \frac{(\mathbb{E}[f(Z, W)])^2}{\mathbb{E}[f^2(Z, W)]} \wedge \mathbb{E}[f(Z, W)] \right), \end{aligned}$$

which completes the proof of the first assertion of the lemma.

(b) Since  $\log(1+x) \leq x - 3x^2/8$  for any  $x \in [-0.5, 0.5]$ , we know that:

$$\begin{aligned} \mathbb{E}[\log(1 + \lambda_* f(Z, W))] &\leq \mathbb{E} \left[ \lambda_* f(Z, W) - \frac{3}{8} (\lambda_* f(Z, W))^2 \right] \\ &\leq \max_{\lambda \in [-0.5, 0.5]} \left( \lambda \cdot \mathbb{E}[f(Z, W)] - \frac{3\lambda^2}{8} \cdot \mathbb{E}[(f(Z, W))^2] \right). \end{aligned}$$

The optimizer of the above is

$$\tilde{\lambda} = \frac{4\mathbb{E}[f(Z, W)]}{3\mathbb{E}[(f(Z, W))^2]} \wedge \frac{1}{2}.$$

Hence, as long as  $\mathbb{E}[f(Z, W)] \leq (3/8) \cdot \mathbb{E}[(f(Z, W))^2]$ , we have:

$$\mathbb{E}[\log(1 + \lambda_* f(Z, W))] \leq \frac{2}{3} \frac{(\mathbb{E}[f(Z, W)])^2}{\mathbb{E}[(f(Z, W))^2]}. \quad (50)$$

If however,  $\mathbb{E}[f(Z, W)] > (3/8) \cdot \mathbb{E}[(f(Z, W))^2]$ , then we know that:

$$\mathbb{E}[\log(1 + \lambda_* f(Z, W))] \leq \frac{\mathbb{E}[f(Z, W)]}{2}.$$

To bring it to a convenient form, we multiply the upper bound in (50) by two and get the bound (46), which completes the proof of the second assertion of the lemma.

□

### D.3 Proofs for Section 2

**Proposition 1.** Fix an arbitrary predictor  $g \in \mathcal{G}$ . The following claims hold:

1. For the misclassification risk, we have that:

$$\sup_{s \in [0, 1]} \left( \frac{1}{2} - R_m(sg) \right) = \left( \frac{1}{2} - R_m(g) \right) \vee 0 = \left( \frac{1}{2} \cdot \mathbb{E}[W \cdot \text{sign}[g(Z)]] \right) \vee 0. \quad (9)$$

2. For the squared risk, we have that:

$$\sup_{s \in [0, 1]} (1 - R_s(sg)) \geq (\mathbb{E}[W \cdot g(Z)] \vee 0) \cdot \left( \frac{\mathbb{E}[W \cdot g(Z)]}{\mathbb{E}[g^2(Z)]} \wedge 1 \right) \quad (10)$$

Further,  $d_s(P, Q) > 0$  if and only if there exists  $g \in \mathcal{G}$  such that  $\mathbb{E}[W \cdot g(Z)] > 0$ .

*Proof.* 1. The first equality in (9) follows from two facts: (a) for any  $g \in \mathcal{G}$  and any  $s \in (0, 1]$ , it holds that  $R_m(sg) = R_m(g)$ , (b)  $R_m(0) = 1/2$ . The second equality easily follows from the following fact:  $\text{sign}[x]/2 = 1/2 - \mathbb{1}\{x < 0\}$ .

2. Consider an arbitrary predictor  $g \in \mathcal{G}$ . Let us consider all possible scenarios:

611 (a) If  $\mathbb{E} [W \cdot g(Z)] \leq 0$ , then the RHS of (10) is zero. For the LHS of (10), we have that:

$$\sup_{s \in [0,1]} (1 - R_s(sg)) \geq 1 - R_s(0) = 0,$$

612 so the bound (10) holds.

613 (b) Next, assume that  $\mathbb{E} [W \cdot g(Z)] > 0$ , then it is easy to derive that:

$$s_\star := \arg \max_{s \in [0,1]} (1 - R_s(sg)) = \frac{\mathbb{E} [W \cdot g(Z)]}{\mathbb{E} [g^2(Z)]} \wedge 1. \quad (51)$$

614 A simple calculation shows that:

$$1 - R_s(s_\star g) \geq \mathbb{E} [W \cdot g(Z)] \cdot \left( \frac{\mathbb{E} [W \cdot g(Z)]}{\mathbb{E} [g^2(Z)]} \wedge 1 \right),$$

615 and hence, we conclude that the bound (10) holds.

616 To establish the second part of the statement, note that  $d_s(P, Q) > 0$  iff there is a predictor  
617  $g \in \mathcal{G}$  such that  $R_s(g) < 1$ . For the squared risk, we have:

$$1 - R_s(g) = 2\mathbb{E} [W \cdot g(Z)] - \mathbb{E} [g^2(Z)], \quad (52)$$

618 and hence,  $R_s(g) < 1$  trivially implies that  $\mathbb{E} [W \cdot g(Z)] > 0$ . The converse implication  
619 trivially follows from (10). Hence, the result follows.

620 □

621 **Theorem 1.** *The following claims hold:*

- 622 1. Suppose that  $H_0$  in (1a) is true. Then the oracle sequential test based on either  $(\mathcal{K}_t^{m,\star})_{t \geq 0}$   
623 or  $(\mathcal{K}_t^{s,\star})_{t \geq 0}$  ever stops with probability at most  $\alpha$ :  $\mathbb{P}_{H_0}(\tau < \infty) \leq \alpha$ .  
624 2. Suppose that  $H_1$  in (1b) is true. Then:

625 (a) The growth rate of the oracle wealth process  $(\mathcal{K}_t^{m,\star})_{t \geq 0}$  satisfies:

$$\liminf_{t \rightarrow \infty} \left( \frac{1}{t} \log \mathcal{K}_t^{m,\star} \right) \stackrel{\text{a.s.}}{\geq} \left( \frac{1}{2} - R_m(g_\star) \right)^2. \quad (14)$$

626 If  $R_m(g_\star) < 1/2$ , then the test based on  $(\mathcal{K}_t^{m,\star})_{t \geq 0}$  is consistent:  $\mathbb{P}_{H_1}(\tau < \infty) = 1$ .  
627 Further, the optimal growth rate achieved by  $\lambda_\star^m$  in (13) satisfies:

$$\mathbb{E} [\log(1 + \lambda_\star^m f_\star^m(Z, W))] \leq \left( \frac{16}{3} \cdot \left( \frac{1}{2} - R_m(g_\star) \right)^2 \wedge \left( \frac{1}{2} - R_m(g_\star) \right) \right). \quad (15)$$

628 (b) The growth rate of the oracle wealth process  $(\mathcal{K}_t^{s,\star})_{t \geq 0}$  satisfies:

$$\liminf_{t \rightarrow \infty} \left( \frac{1}{t} \log \mathcal{K}_t^{s,\star} \right) \stackrel{\text{a.s.}}{\geq} \frac{1}{4} \cdot \mathbb{E} [W \cdot g_\star(Z)]. \quad (16)$$

629 If  $\mathbb{E} [W \cdot g_\star(Z)] > 0$ , then the test based on  $(\mathcal{K}_t^{s,\star})_{t \geq 0}$  is consistent:  $\mathbb{P}_{H_1}(\tau < \infty) = 1$ .  
630 Further, the optimal growth rate achieved by  $\lambda_\star^s$  in (13) satisfies:

$$\mathbb{E} [\log(1 + \lambda_\star^s f_\star^s(Z, W))] \leq \frac{1}{2} \cdot \mathbb{E} [W \cdot g_\star(Z)]. \quad (17)$$

631 *Proof.* 1. We trivially have that the payoff functions (11a) and (11b) are bounded:  $\forall (z, w) \in$   
632  $\mathcal{Z} \times \{-1, 1\}$ , it holds that  $f_\star^m(z, w) \in [-1, 1]$  and  $f_\star^s(z, w) \in [-1, 1]$ . Further, under the null  
633  $H_0$  in (1a), it trivially holds that  $\mathbb{E}_{H_0} [f_\star^m(Z_t, W_t) \mid \mathcal{F}_{t-1}] = \mathbb{E}_{H_0} [f_\star^s(Z_t, W_t) \mid \mathcal{F}_{t-1}] = 0$ ,  
634 where  $\mathcal{F}_{t-1} = \sigma(\{(Z_i, W_i)\}_{i \leq t-1})$ . Since ONS betting fractions  $(\lambda_t^{\text{ONS}})_{t \geq 1}$  are pre-  
635 dictable, we conclude that the resulting wealth process is a nonnegative martingale. The  
636 assertion of the Theorem then follows directly from Ville's inequality (Proposition 2) when  
637  $a = 1/\alpha$ .

638 2. Suppose that  $H_1$  in (1b) is true. First, we prove the results for the lower bounds:

- (a) Consider the wealth process based on the misclassification risk  $(\mathcal{K}_t^{\text{m},*})_{t \geq 0}$ . Note that for all  $t \geq 1$ :

$$\mathbb{E} [f_\star^{\text{m}}(Z_t, W_t)] = 2 \cdot \left( \frac{1}{2} - R_{\text{m}}(g_\star) \right), \quad (f_\star^{\text{m}}(Z_t, W_t))^2 = 1.$$

Since  $\mathbb{E} [f_\star^{\text{m}}(Z_t, W_t)] \in [0, 1]$ , we also have  $(\mathbb{E} [f_\star^{\text{m}}(Z_t, W_t)])^2 \leq \mathbb{E} [f_\star^{\text{m}}(Z_t, W_t)]$ . From the first part of Lemma 6, it follows that:

$$\liminf_{t \rightarrow \infty} \frac{\log \mathcal{K}_t^{\text{m},*}}{t} \stackrel{\text{a.s.}}{\geq} \frac{1}{4} (\mathbb{E} [f_\star^{\text{m}}(Z_t, W_t)])^2 = \left( \frac{1}{2} - R_{\text{m}}(g_\star) \right)^2.$$

From the second part of Lemma 6, and (46) in particular, it follows that:

$$\mathbb{E} [\log (1 + \lambda_\star^{\text{m}} f_\star^{\text{m}}(Z, W))] \leq \left( \frac{16}{3} \cdot \left( \frac{1}{2} - R_{\text{m}}(g_\star) \right)^2 \wedge \left( \frac{1}{2} - R_{\text{m}}(g_\star) \right) \right).$$

The first term in the above is smaller or equal than the second one whenever  $R_{\text{m}}(g_\star) \geq 5/16$ . We conclude that the assertion of the theorem is true.

- (b) Next, we consider the wealth process based on the squared error:  $(\mathcal{K}_t^{\text{s},*})_{t \geq 0}$ . Note that:

$$\begin{aligned} \mathbb{E} [f_\star^{\text{s}}(Z_t, W_t)] &= \mathbb{E} [W \cdot g_\star(Z)], \\ \mathbb{E} [(f_\star^{\text{s}}(Z_t, W_t))^2] &= \mathbb{E} [g_\star^2(Z)], \end{aligned}$$

and hence from Lemma 6, it follows that:

$$\liminf_{t \rightarrow \infty} \frac{\log \mathcal{K}_t^{\text{s},*}}{t} \stackrel{\text{a.s.}}{\geq} \frac{1}{4} \left( \frac{(\mathbb{E} [W \cdot g_\star(Z)])^2}{\mathbb{E} [g_\star^2(Z)]} \wedge \mathbb{E} [W \cdot g_\star(Z)] \right). \quad (53)$$

In the above, we assume that the following case is not possible:  $g_\star(Z) \stackrel{\text{a.s.}}{=} 0$  (for such  $g_\star$ , the corresponding expected margin and the growth rate of the resulting wealth process are clearly zero, and will still be highlighted in our resulting bound). Next, note that since  $g_\star \in \arg \min_{g \in \mathcal{G}} R_{\text{s}}(g)$ , we have that:

$$1 - R_{\text{s}}(g_\star) = \sup_{s \in [0,1]} (1 - R_{\text{s}}(s g_\star)),$$

meaning that  $g_\star$  can not be improved by scaling with  $s < 1$ . From Proposition 1, and (51) in particular, it follows that:

$$\frac{\mathbb{E} [W \cdot g_\star(Z)]}{\mathbb{E} [g_\star^2(Z)]} \geq 1, \quad (54)$$

and hence, the bound (53) reduces to

$$\liminf_{t \rightarrow \infty} \frac{\log \mathcal{K}_t^{\text{s},*}}{t} \stackrel{\text{a.s.}}{\geq} \frac{\mathbb{E} [W \cdot g_\star(Z)]}{4}.$$

From the second part of Lemma 6, it follows that:

$$\mathbb{E} [\log (1 + \lambda_\star^{\text{s}} f_\star^{\text{s}}(Z, W))] \leq \frac{4}{3} \frac{(\mathbb{E} [W \cdot g_\star(Z)])^2}{\mathbb{E} [(g_\star(Z))^2]} \wedge \frac{\mathbb{E} [W \cdot g_\star(Z)]}{2}. \quad (55)$$

Next, we use that  $g_\star$  satisfies (54), which implies that the second term in (55) is smaller, and hence,

$$\mathbb{E} [\log (1 + \lambda_\star^{\text{s}} f_\star^{\text{s}}(Z, W))] \leq \frac{\mathbb{E} [W \cdot g_\star(Z)]}{2},$$

which concludes the proof of the second part of the theorem.  $\square$

660 **Corollary 1.** Consider an arbitrary  $g \in \mathcal{G}$  with nonnegative expected margin:  $\mathbb{E}[W \cdot g(Z)] \geq 0$ .  
 661 Then the growth rate of the corresponding wealth process  $(\mathcal{K}_t^s)_{t \geq 0}$  satisfies:

$$\liminf_{t \rightarrow \infty} \left( \frac{1}{t} \log \mathcal{K}_t^s \right) \stackrel{\text{a.s.}}{\geq} \frac{1}{4} \left( \sup_{s \in [0,1]} (1 - R_s(sg)) \wedge \mathbb{E}[W \cdot g(Z)] \right) \quad (18a)$$

$$\geq \frac{1}{4} (\mathbb{E}[W \cdot g(Z)])^2, \quad (18b)$$

662 and the optimal growth rate achieved by  $\lambda_\star^s$  in (13) satisfies:

$$\mathbb{E}[\log(1 + \lambda_\star^s f^s(Z, W))] \leq \left( \frac{4}{3} \cdot \sup_{s \in [0,1]} (1 - R_s(sg)) \right) \wedge \left( \frac{1}{2} \cdot \mathbb{E}[W \cdot g(Z)] \right). \quad (19)$$

663 *Proof.* Following the same argument as that of the proof of Theorem 1, we can deduce that:

$$\liminf_{t \rightarrow \infty} \frac{\log \mathcal{K}_t^s}{t} \stackrel{\text{a.s.}}{\geq} \frac{1}{4} \left( \frac{(\mathbb{E}[W \cdot g(Z)])^2}{\mathbb{E}[g^2(Z)]} \wedge \mathbb{E}[W \cdot g(Z)] \right). \quad (56)$$

664 Hence, it suffices to argue that the lower bound (56) is equivalent to (18a). Without loss of generality,  
 665 we can assume that  $\mathbb{E}[W \cdot g(Z)] \geq 0$ , and further, the two lower bounds are equal if  $\mathbb{E}[W \cdot g(Z)] =$   
 666 0. Hence, we consider the case when  $\mathbb{E}[W \cdot g(Z)] > 0$ . First, let us consider the case when

$$\frac{\mathbb{E}[W \cdot g(Z)]}{\mathbb{E}[g^2(Z)]} < 1. \quad (57)$$

667 Using (51), we get that:

$$\sup_{s \in [0,1]} (1 - R_s(sg)) = \frac{(\mathbb{E}[W \cdot g(Z)])^2}{\mathbb{E}[g^2(Z)]}, \quad (58)$$

668 and hence, two bounds coincide. For the upper bound (19), we use Lemma 6, and the upper bound (46)  
 669 in particular. Note that the first term in (46) is less than the second term whenever

$$\frac{\mathbb{E}[W \cdot g(Z)]}{\mathbb{E}[(g(Z))^2]} \leq \frac{3}{8} < 1.$$

670 However, in this regime we also know that (58) holds, and hence the two bounds coincide. This  
 671 completes the proof. □

673 **Theorem 2.** The following claims hold for Seq-C-2ST (Algorithm 2):

- 674 1. If  $H_0$  in (1a) is true, the test ever stops with probability at most  $\alpha$ :  $\mathbb{P}_{H_0}(\tau < \infty) \leq \alpha$ .  
 675 2. Suppose that  $H_1$  in (1b) is true. Then:  
 676 (a) Under Assumption 1, the test with the payoff (22a) is consistent:  $\mathbb{P}_{H_1}(\tau < \infty) = 1$ .  
 677 (b) Under Assumption 2, the test with the payoff (22b) is consistent:  $\mathbb{P}_{H_1}(\tau < \infty) = 1$ .

678 *Proof.* 1. We trivially have that the payoff functions (22a) and (22b) are bounded:  $\forall t \geq 1$   
 679 and  $\forall (z, w) \in \mathcal{Z} \times \{-1, 1\}$ , it holds that  $f_t^m(z, w) \in [-1, 1]$  and  $f_t^s(z, w) \in [-1, 1]$ .  
 680 Further, under the null  $H_0$  in (1a), it trivially holds that  $\mathbb{E}_{H_0}[f_t^m(Z_t, W_t) | \mathcal{F}_{t-1}] =$   
 681  $\mathbb{E}_{H_0}[f_t^s(Z_t, W_t) | \mathcal{F}_{t-1}] = 0$ , where  $\mathcal{F}_{t-1} = \sigma(\{(Z_i, W_i)\}_{i \leq t-1})$ . Since ONS betting  
 682 fractions  $(\lambda_t^{\text{ONS}})_{t \geq 1}$  are predictable, we conclude that the resulting wealth process is a  
 683 nonnegative martingale. The assertion of the Theorem then follows directly from Ville's  
 684 inequality (Proposition 2) when  $a = 1/\alpha$ .

685 2. Note that if ONS strategy for selecting betting fractions is deployed, then (49) implies that  
 686 the tests will be consistent as long as

$$\liminf_{t \rightarrow \infty} \frac{1}{t} \sum_{i=1}^t f_i \stackrel{\text{a.s.}}{>} 0, \quad (59)$$

687 where for  $i \geq 1$ ,  $f_i = f_i^m(Z_i, W_i)$  and  $f_i = f_i^s(Z_i, W_i)$  for the payoffs based on the  
 688 misclassification and the squared risks respectively.

689 (a) Recall that

$$f_i^m(Z_i, W_i) = W_i \cdot \text{sign}[g_i(Z_i)],$$

690 and Assumption 1 states that:

$$\limsup_{t \rightarrow \infty} \frac{1}{t} \sum_{i=1}^t \mathbb{1}\{W_i \cdot \text{sign}[g_i(Z_i)] < 0\} \stackrel{\text{a.s.}}{<} \frac{1}{2}.$$

691 Since  $\mathbb{1}\{x < 0\} = (1 - \text{sign}[x])/2$ , we get that:

$$\limsup_{t \rightarrow \infty} \frac{1}{t} \sum_{i=1}^t \left( \frac{1}{2} - \frac{W_i \cdot \text{sign}[g_i(Z_i)]}{2} \right) \stackrel{\text{a.s.}}{<} \frac{1}{2},$$

692 which, after rearranging and multiplying by two, implies that:

$$\liminf_{t \rightarrow \infty} \frac{1}{t} \sum_{i=1}^t W_i \cdot \text{sign}[g_i(Z_i)] \stackrel{\text{a.s.}}{>} 0.$$

693 Hence, a sufficient condition for consistency (59) holds, and we conclude that the result  
694 is true.

695 (b) Recall that

$$f_i^s(Z_i, W_i) = W_i \cdot g_i(Z_i),$$

696 and Assumption 2 states that:

$$\limsup_{t \rightarrow \infty} \frac{1}{t} \sum_{i=1}^t (g_i(Z_i) - W_i)^2 \stackrel{\text{a.s.}}{<} 1,$$

697 which is equivalent to

$$\limsup_{t \rightarrow \infty} \frac{1}{t} \sum_{i=1}^t (g_i^2(Z_i) - 2W_i \cdot g_i(Z_i)) \stackrel{\text{a.s.}}{<} 0.$$

698 It is easy to see that the above, in turn, implies that:

$$\liminf_{t \rightarrow \infty} \frac{1}{t} \sum_{i=1}^t W_i \cdot g_i(Z_i) \stackrel{\text{a.s.}}{>} 0.$$

699 Hence, a sufficient condition for consistency (59) holds, and we conclude that the result  
700 is true.

701

□

## 702 D.4 Proofs for Appendix A

703 **Theorem 3.** *The following claims hold for the oracle sequential regression-based IT based on*  
704  *$(\mathcal{K}_t^{r,*})_{t \geq 0}$ .*

- 705 1. *Suppose that  $H_0$  in (26a) is true. Then the test ever stops with probability at most  $\alpha$ :*  
706  *$\mathbb{P}_{H_1}(\tau < \infty) \leq \alpha$ .*
- 707 2. *Suppose that  $H_1$  in (26b) is true. Further, suppose that:  $\mathbb{E}[W\ell(g_*(X), Y)] > 0$ . Then the*  
708 *test is consistent:  $\mathbb{P}_{H_1}(\tau < \infty) = 1$ .*

709 *Proof.* 1. We trivially have that the payoff function (27) is bounded:  $\forall(x, y, w) \in \mathcal{X} \times \mathcal{Y} \times$   
710  $\{-1, 1\}$ , it holds that  $f_*^r(x, y, w) \in [-1, 1]$ . Further, under the null  $H_0$  in (26a), it trivially  
711 holds that  $\mathbb{E}_{H_0}[f_*^r(X_t, Y_t, W_t) \mid \mathcal{F}_{t-1}] = 0$ , where  $\mathcal{F}_{t-1} = \sigma(\{(X_i, Y_i, W_i)\}_{i \leq t-1})$ . Since  
712 ONS betting fractions  $(\lambda_t^{\text{ONS}})_{t \geq 1}$  are predictable, we conclude that the resulting wealth  
713 process is a nonnegative martingale. The assertion of the Theorem then follows directly  
714 from Ville's inequality (Proposition 2) when  $a = 1/\alpha$ .

715 2. Note that if ONS strategy for selecting betting fractions is deployed, then (49) implies that  
 716 the tests will be consistent as long as

$$\liminf_{t \rightarrow \infty} \frac{1}{t} \sum_{i=1}^t f_{\star}^r(X_i, Y_i, W_i) \stackrel{\text{a.s.}}{>} 0. \quad (60)$$

717 Note that:

$$\frac{1}{t} \sum_{i=1}^t f_{\star}^r(X_i, Y_i, W_i) = \frac{1}{t} \sum_{i=1}^t \tanh(s_{\star} \cdot W_i \ell(g_{\star}(X_i), Y_i)) \xrightarrow{\text{a.s.}} \mathbb{E} [\tanh(s_{\star} \cdot W \ell(g_{\star}(X), Y))].$$

718 Note that for any  $x \in \mathbb{R} : \tanh(x) \geq x - \frac{1}{3} \cdot \max\{x^3, 0\}$ . Hence, for any  $s > 0$ , it holds  
 719 that:

$$\begin{aligned} \mathbb{E} [\tanh(s \cdot W \ell(g_{\star}(X), Y))] &\geq s \mathbb{E} [W \ell(g_{\star}(X), Y)] - \frac{1}{3} \mathbb{E} [\max\{s^3 \cdot W (\ell(g_{\star}(X), Y))^3, 0\}] \\ &= s \mathbb{E} [W \ell(g_{\star}(X), Y)] - \frac{s^3}{3} \mathbb{E} [(\ell(g_{\star}(X), Y))^3 \cdot \max\{W, 0\}] \\ &= s \mathbb{E} [W \ell(g_{\star}(X), Y)] - \frac{s^3}{6} \mathbb{E} [(1 + W) \cdot (\ell(g_{\star}(X), Y))^3], \end{aligned} \quad (61)$$

720 where we used that  $\max\{W, 0\} = (W + 1)/2$  since  $W \in \{-1, 1\}$ . Maximizing the RHS  
 721 of (61) over  $s > 0$  yields  $s_{\star}$  defined in (28a). Hence,

$$\begin{aligned} \mathbb{E} [\tanh(s_{\star} \cdot W \ell(g_{\star}(X), Y))] &\geq s_{\star} \mathbb{E} [W \ell(g_{\star}(X), Y)] - \frac{s_{\star}^3}{6} \mathbb{E} [(1 + W) \cdot (\ell(g_{\star}(X), Y))^3] \\ &= s_{\star} \left( \mathbb{E} [W \ell(g_{\star}(X), Y)] - \frac{s_{\star}^2}{6} \mathbb{E} [(1 + W) \cdot (\ell(g_{\star}(X), Y))^3] \right) \\ &= s_{\star} \left( \mathbb{E} [W \ell(g_{\star}(X), Y)] - \frac{1}{3} \mathbb{E} [W \ell(g_{\star}(X), Y)] \right) \\ &= \frac{2s_{\star}}{3} \mathbb{E} [W \ell(g_{\star}(X), Y)] > 0. \end{aligned}$$

722 Hence, we conclude that the oracle regression-based IT is consistent since the sufficient condition (62)  
 723 holds.  $\square$

724 **Theorem 4.** *The following claims hold for the proxy sequential regression-based IT (Algorithm 3):*

725 1. Suppose that  $H_0$  in (26a) is true. Then the test ever stops with probability at most  $\alpha$ :  
 726  $\mathbb{P}_{H_0}(\tau < \infty) \leq \alpha$ .

727 2. Suppose that  $H_1$  in (26b) is true. Further, suppose that Assumptions 3 and 4 are satisfied.  
 728 Then the test is consistent:  $\mathbb{P}_{H_1}(\tau < \infty) = 1$ .

729 *Proof.* 1. We trivially have that the payoff function (29) is bounded:  $\forall (x, y, w) \in \mathcal{X} \times \mathcal{Y} \times$   
 730  $\{-1, 1\}$ , it holds that  $f_t^r(x, y, w) \in [-1, 1]$ . Further, under the null  $H_0$  in (26a), it trivially  
 731 holds that  $\mathbb{E}_{H_0} [f_t^r(X_t, Y_t, W_t) \mid \mathcal{F}_{t-1}] = 0$ , where  $\mathcal{F}_{t-1} = \sigma(\{(X_i, Y_i, W_i)\}_{i \leq t-1})$ . Since  
 732 ONS betting fractions  $(\lambda_t^{\text{ONS}})_{t \geq 1}$  are predictable, we conclude that the resulting wealth  
 733 process is a nonnegative martingale. The assertion of the Theorem then follows directly  
 734 from Ville's inequality (Proposition 2) with  $a = 1/\alpha$ .

735 2. Note that if ONS strategy for selecting betting fractions is deployed, then (49) implies that  
 736 the tests will be consistent as long as

$$\liminf_{t \rightarrow \infty} \frac{1}{t} \sum_{i=1}^t f_t^r(X_i, Y_i, W_i) \stackrel{\text{a.s.}}{>} 0. \quad (62)$$

737 (a) **Step 1.** Consider a predictable sequence of scaling factors  $(s_t)_{t \geq 1}$ , defined in (30a),  
 738 and the corresponding sequences  $(\mu_t)_{t \geq 1}$  and  $(\nu_t)_{t \geq 1}$ , defined in (30b) and (30c)

739 respectively. For  $t \geq 1$ , let  $\mathcal{F}_t := \sigma(\{(X_i, Y_i, W_i)\}_{i \leq t})$ . Since the losses are bounded,  
 740 we have that:

$$(W_i \cdot \ell(g(X_i; \theta_i), Y_i) - \mathbb{E}[W_i \cdot \ell(g(X_i; \theta_i), Y_i) \mid \mathcal{F}_{i-1}])_{i \geq 1},$$

741 is a bounded martingale difference sequence (BMDS). By the Strong Law of Large  
 742 Numbers for BMDS, it follows that:

$$\frac{1}{t} \sum_{i=1}^t (W_i \cdot \ell(g(X_i; \theta_i), Y_i) - \mathbb{E}[W_i \cdot \ell(g(X_i; \theta_i), Y_i) \mid \mathcal{F}_{i-1}]) \xrightarrow{\text{a.s.}} 0.$$

743 Since  $((X_t, Y_t, W_t))_{t \geq 1}$  is a sequence of i.i.d. observations, we can write

$$\frac{1}{t} \sum_{i=1}^t \mathbb{E}[W_i \cdot \ell(g(X_i; \theta_i), Y_i) \mid \mathcal{F}_{i-1}] = \frac{1}{t} \sum_{i=1}^t \mathbb{E}[W \cdot \ell(g(X; \theta_i), Y) \mid \theta_i],$$

744 where  $(X, Y, W) \perp\!\!\!\perp (\theta_t)_{t \geq 1}, \theta_*$ . Using Assumption 3, we get that:

$$\begin{aligned} & \left| \frac{1}{t} \sum_{i=1}^t \mathbb{E}[W \cdot \ell(g(X; \theta_i), Y) \mid \theta_i] - \mathbb{E}[W \cdot \ell(g(X; \theta_*), Y) \mid \theta_*] \right| \\ & \leq \frac{1}{t} \sum_{i=1}^t \sup_{\substack{x \in \mathcal{X} \\ y \in \mathcal{Y}}} |\ell(g(x; \theta_i), y) - \ell(g(x; \theta_*), y)| \\ & \leq \frac{1}{t} \sum_{i=1}^t L_2 \sup_{x \in \mathcal{X}} |g(x; \theta_i) - g(x; \theta_*)| \\ & \leq \frac{1}{t} \sum_{i=1}^t L_2 \cdot L_1 \cdot \|\theta_i - \theta_*\| \xrightarrow{\text{a.s.}} 0, \end{aligned} \tag{63}$$

745 since  $\|\theta_i - \theta_*\| \xrightarrow{\text{a.s.}} 0$  by Assumption 4. In particular, this implies that  $\mu_t \xrightarrow{\text{a.s.}}$   
 746  $\mathbb{E}[W \ell(g(X; \theta_*), Y) \mid \theta_*]$ . Similar argument can be used to show that  $\nu_t \xrightarrow{\text{a.s.}}$   
 747  $\mathbb{E}[(1 + W) \cdot (\ell(g(X; \theta_*), Y))^3 \mid \theta_*]$ , and hence,

$$s_t \xrightarrow{\text{a.s.}} \sqrt{\frac{2 \mathbb{E}[W \ell(g(X; \theta_*), Y) \mid \theta_*]}{\mathbb{E}[(1 + W) \cdot (\ell(g(X; \theta_*) , Y))^3 \mid \theta_*]}} =: s_*. \tag{64}$$

748 Note that  $s_*$  is a random variable which is positive (almost surely) by Assumption 4.

749 (b) **Step 2.** Recall that for any  $x \in \mathbb{R}$  :  $\tanh(x) \geq x - \frac{1}{3} \cdot \max\{x^3, 0\}$  and that  
 750  $\max\{W, 0\} = (W + 1)/2$  since  $W \in \{-1, 1\}$ . We have:

$$\begin{aligned} \frac{1}{t} \sum_{i=1}^t f_i^r(X_i, Y_i, W_i) &= \frac{1}{t} \sum_{i=1}^t \tanh(s_i \cdot W_i \ell(g(X_i; \theta_i), Y_i)) \\ &\geq \frac{1}{t} \sum_{i=1}^t \left( s_i \cdot W_i \cdot \ell(g(X_i; \theta_i), Y_i) - \frac{s_i^3}{6} \cdot (1 + W_i) \cdot (\ell(g(X_i; \theta_i), Y_i))^3 \right). \end{aligned}$$

751 Note that  $\theta_i$  and  $s_i$  are  $\mathcal{F}_{i-1}$ -measurable (see Step 1 for the definition of  $\mathcal{F}_{i-1}$ ). Under  
 752 a minor technical assumption that  $(s_t)_{t \geq 1}$  is a sequence of bounded scaling factors (the  
 753 lower bound is trivially zero and the upper bound also holds if  $\nu_t$  are bounded away  
 754 from zero almost surely which is reasonable given the definition of  $\nu_t$ ), we can use  
 755 analogous argument regarding a BMDS in Step 1 to deduce that:

$$\begin{aligned} & \liminf_{t \rightarrow \infty} \frac{1}{t} \sum_{i=1}^t f_i^r(X_i, Y_i, W_i) \\ & \geq \liminf_{t \rightarrow \infty} \frac{1}{t} \sum_{i=1}^t \left( s_i \cdot \mathbb{E}[W \cdot \ell(g(X; \theta_i), Y) \mid \theta_i] - \frac{s_i^3}{6} \mathbb{E}[(1 + W) \cdot (\ell(g(X; \theta_i), Y))^3 \mid \theta_i] \right). \end{aligned} \tag{65}$$

756

Using argument analogous to (63), we can show that:

$$\frac{1}{t} \sum_{i=1}^t \mathbb{E} [(1+W) \cdot (\ell(g(X; \theta_i), Y))^3 \mid \theta_i] \xrightarrow{\text{a.s.}} \mathbb{E} [(1+W) \cdot (\ell(g(X; \theta_\star), Y))^3 \mid \theta_\star]. \quad (66)$$

757

Combining (63), (64) and (66), we deduce that

$$\begin{aligned} & \frac{1}{t} \sum_{i=1}^t \left( s_i \cdot \mathbb{E} [W \cdot \ell(g(X; \theta_i), Y) \mid \theta_i] - \frac{s_i^3}{6} \mathbb{E} [(1+W) \cdot (\ell(g(X; \theta_i), Y))^3 \mid \theta_i] \right) \\ & \xrightarrow{\text{a.s.}} s_\star \cdot \mathbb{E} [W \cdot \ell(g(X; \theta_\star), Y) \mid \theta_\star] - \frac{s_\star^3}{6} \mathbb{E} [(1+W) \cdot (\ell(g(X; \theta_\star), Y))^3 \mid \theta_\star] \\ & = \frac{2s_\star}{3} \cdot \mathbb{E} [W \cdot \ell(g(X; \theta_\star), Y) \mid \theta_\star]. \end{aligned}$$

758

Hence, from (65) it follows that:

$$\liminf_{t \rightarrow \infty} \frac{1}{t} \sum_{i=1}^t f_i^f(X_i, Y_i, W_i) \geq \frac{2s_\star}{3} \cdot \mathbb{E} [W \cdot \ell(g(X; \theta_\star), Y) \mid \theta_\star],$$

759

where the RHS is a random variable which is positive almost surely. Hence, a sufficient condition for consistency (62) holds which concludes the proof.

760

761

□

## 762 D.5 Proofs for Appendix B

763 **Two-Sample Testing with Unbalanced Classes.** Note that  $(g(z) = 2\eta(z) - 1)$ :

$$\begin{aligned} & (1 - \lambda_t) \cdot 1 + \lambda_t \cdot \frac{(\eta(Z_t))^{\mathbb{1}\{W_t=1\}} (1 - \eta(Z_t))^{1-\mathbb{1}\{W_t=1\}}}{(\pi)^{\mathbb{1}\{W_t=1\}} (1 - \pi)^{1-\mathbb{1}\{W_t=1\}}} \\ & = (1 - \lambda_t) \cdot 1 + \lambda_t \cdot \frac{\left(\frac{1+g(Z_t)}{2}\right)^{\mathbb{1}\{W_t=1\}} \left(\frac{1-g(Z_t)}{2}\right)^{1-\mathbb{1}\{W_t=1\}}}{(\pi)^{\mathbb{1}\{W_t=1\}} (1 - \pi)^{1-\mathbb{1}\{W_t=1\}}} \\ & = (1 - \lambda_t) \cdot 1 + \frac{\lambda_t}{2} \cdot \frac{(1 + g(Z_t))^{\mathbb{1}\{W_t=1\}} (1 - g(Z_t))^{1-\mathbb{1}\{W_t=1\}}}{(\pi)^{\mathbb{1}\{W_t=1\}} (1 - \pi)^{1-\mathbb{1}\{W_t=1\}}} \\ & = (1 - \lambda_t) \cdot 1 + \frac{\lambda_t}{2} \cdot \frac{1 + W_t g(Z_t)}{(\pi)^{\mathbb{1}\{W_t=1\}} (1 - \pi)^{1-\mathbb{1}\{W_t=1\}}} \\ & = (1 - \lambda_t) \cdot 1 + \frac{\lambda_t}{2} \cdot \frac{2}{1 + W_t(2\pi - 1)} \cdot (1 + W_t g(Z_t)) \\ & = (1 - \lambda_t) \cdot 1 + \frac{\lambda_t}{1 + W_t(2\pi - 1)} \cdot (1 + W_t g(Z_t)) \\ & = 1 + \lambda_t \cdot \frac{W_t (g(Z_t) - (2\pi - 1))}{1 + W_t(2\pi - 1)}. \end{aligned}$$

764

**Payoff for the Case of Unbalanced Classes (known  $\pi$ ).** To see that the payoff function (37) is

765

lower bounded by negative one, note that:

$$\begin{aligned} f_t^u(z, 1) &= \frac{g_t(z) - (2\pi - 1)}{2\pi} \geq \frac{-1 - (2\pi - 1)}{2\pi} = -1, \\ f_t^u(z, -1) &= \frac{-g_t(z) + (2\pi - 1)}{2(1 - \pi)} \geq \frac{-1 + (2\pi - 1)}{2(1 - \pi)} = -1. \end{aligned}$$

766

To see that such payoff is fair, note that:

$$\mathbb{E}_{H_0} [f_t^u(Z_t, W_t) \mid \mathcal{F}_{t-1}] = \mathbb{E}_P \left[ \pi \cdot \frac{g_t(Z_t) - (2\pi - 1)}{2\pi} \right] - \mathbb{E}_Q \left[ (1 - \pi) \cdot \frac{g_t(Z_t) - (2\pi - 1)}{2(1 - \pi)} \mid \mathcal{F}_{t-1} \right] = 0,$$

767

where  $\mathcal{F}_{t-1} = \sigma(\{(Z_i, W_i)\}_{i \leq t-1})$ .



768 **Theorem 5.** Suppose that  $H_0$  in (35a) is true. Then  $(\mathcal{K}_t^u)_{t \geq 0}$  is a nonnegative supermartingale  
 769 adapted to  $(\mathcal{F}_t)_{t \geq 0}$ . Hence, the sequential 2ST based on  $(\mathcal{K}_t^u)_{t \geq 0}$  satisfies:  $\mathbb{P}_{H_0}(\tau < \infty) \leq \alpha$ .

770 *Proof.* First, we show that  $(\mathcal{K}_t^u)_{t \geq 0}$  is a nonnegative supermartingale. For any  $t \geq 1$ , the wealth  
 771  $\mathcal{K}_{t-1}$  is multiplied at round  $t$  by

$$1 + \lambda_t f_t^u \left( \{ (Z_{b(t-1)+i}, W_{b(t-1)+i}) \}_{i \in \{1, \dots, b\}} \right) = (1 - \lambda_t) \cdot 1 + \lambda_t \cdot \frac{\prod_{i=b(t-1)+1}^{bt} (1 + W_i g_t(Z_i))}{\prod_{i=1}^b (1 + W_i (2\hat{\pi}_t - 1))}.$$

772 Since  $\lambda_t \in [0, 0.5]$ , we conclude that the process  $(\mathcal{K}_t^u)_{t \geq 0}$  is nonnegative. Next, note that since  $\hat{\pi}_t$  is  
 773 the MLE of  $\pi$  computed from a  $t$ -th minibatch, it follows that:

$$\begin{aligned} 1 + \lambda_t f_t^u \left( \{ (Z_{b(t-1)+i}, W_{b(t-1)+i}) \}_{i \in \{1, \dots, b\}} \right) &\leq (1 - \lambda_t) \cdot 1 + \lambda_t \cdot \frac{\prod_{i=b(t-1)+1}^{bt} (1 + W_i g_t(Z_i))}{\prod_{i=b(t-1)+1}^{bt} (1 + W_i (2\pi - 1))} \\ &= (1 - \lambda_t) \cdot 1 + \lambda_t \cdot \prod_{i=b(t-1)+1}^{bt} \left( \frac{1 + W_i g_t(Z_i)}{1 + W_i (2\pi - 1)} \right). \end{aligned}$$

774 Recall that  $\mathcal{F}_{t-1} = \sigma(\{Z_i, W_i\}_{i \leq b(t-1)})$ . It suffices to show that if  $H_0$  is true, then

$$\mathbb{E}_{H_0} \left[ \prod_{i=b(t-1)+1}^{bt} \left( \frac{1 + W_i g_t(Z_i)}{1 + W_i (2\pi - 1)} \right) \mid \mathcal{F}_{t-1} \right] = 1.$$

775 Note that the individual terms in the above product are independent conditional on  $\mathcal{F}_{t-1}$ . Hence,

$$\mathbb{E}_{H_0} \left[ \prod_{i=b(t-1)+1}^{bt} \left( \frac{1 + W_i g_t(Z_i)}{1 + W_i (2\pi - 1)} \right) \mid \mathcal{F}_{t-1} \right] = \prod_{i=b(t-1)+1}^{bt} \mathbb{E}_{H_0} \left[ \frac{1 + W_i g_t(Z_i)}{1 + W_i (2\pi - 1)} \mid \mathcal{F}_{t-1} \right].$$

776 For any  $i \in \{b(t-1)+1, \dots, bt\}$ , it holds that:

$$\begin{aligned} \mathbb{E}_{H_0} \left[ \frac{1 + W_i g_t(Z_i)}{1 + W_i (2\pi - 1)} \mid \mathcal{F}_{t-1} \right] &= \mathbb{E}_{H_0} \left[ \pi \cdot \frac{1 + g_t(Z_i)}{1 + (2\pi - 1)} + (1 - \pi) \cdot \frac{1 - g_t(Z_i)}{1 - (2\pi - 1)} \mid \mathcal{F}_{t-1} \right] \\ &= \mathbb{E}_{H_0} \left[ \frac{1 + g_t(Z_i)}{2} + \frac{1 - g_t(Z_i)}{2} \mid \mathcal{F}_{t-1} \right] \\ &= 1. \end{aligned}$$

777 Hence, we conclude that  $(\mathcal{K}_t^u)_{t \geq 0}$  is a nonnegative supermartingale adapted to  $(\mathcal{F}_t)_{t \geq 0}$ . The time-  
 778 uniform type I error control of the resulting test then follows from Ville's inequality (Proposition 2).  
 779  $\square$

## 780 E Additional Experiments and Details

### 781 E.1 Modeling Details

782 **CNN Architecture and Training.** We use CNN with 4 convolutional layers (kernel size is taken  
 783 to be  $3 \times 3$ ) and 16, 32, 32, 64 filters respectively. Further, each convolutional layer is followed by  
 784 max-pooling layer ( $2 \times 2$ ). After flattening, those layers are followed by 1 fully connected layer  
 785 with 128 neurons. Dropout ( $p = 0.5$ ) and early stopping (with patience equal to ten epochs and 20%  
 786 of data used in the validation set) is used for regularization. ReLU activation functions are used  
 787 in each layer. Adam optimizer is used for training the network. We start training after processing  
 788 twenty observations, and update the model parameters after processing every next ten observations.  
 789 Maximum number of epochs is set to 25 for each training iteration. The batch size is set to 32.

790 **Single-stream Sequential Kernelized 2ST.** The construction of this test is the extension of 2ST  
 791 of Shekhar and Ramdas [2021] to the case when at each round an observation only from a single  
 792 distribution ( $P$  or  $Q$ ) is revealed. Let  $\mathcal{G}$  denote an RKHS with positive-definite kernel  $k$  and canonical  
 793 feature map  $\varphi(\cdot)$  defined on  $\mathcal{Z}$ . Recall that instances from  $P$  are labeled as  $+1$  and instances from  $Q$   
 794 are labeled as  $-1$  (characterized by  $W$ ). The mean embeddings of  $P$  and  $Q$  are then defined as

$$\hat{\mu}_P^{(t)} = \frac{1}{N_+(t)} \sum_{i=1}^t \varphi(Z_i) \cdot \mathbb{1}\{W_i = +1\},$$

$$\hat{\mu}_Q^{(t)} = \frac{1}{N_-(t)} \sum_{i=1}^t \varphi(Z_i) \cdot \mathbb{1}\{W_i = -1\},$$

795 where  $N_+(t) = |\{i \leq t : W_i = +1\}|$  and  $N_-(t) = |\{i \leq t : W_i = -1\}|$ . The corresponding payoff  
 796 function is

$$f_t^k(Z_{t+1}, W_{t+1}) = W_{t+1} \cdot \hat{g}_t(Z_{t+1}),$$

$$\text{where } \hat{g}_t = \frac{\hat{\mu}_P^{(t)} - \hat{\mu}_Q^{(t)}}{\|\hat{\mu}_P^{(t)} - \hat{\mu}_Q^{(t)}\|_{\mathcal{G}}}.$$

797 To make the test computationally efficient, it is critical to update the normalization constant efficiently.  
 798 Suppose that at round  $t + 1$ , an instance from  $P$  is observed. In this case,  $\hat{\mu}_Q^{(t+1)} = \hat{\mu}_Q^{(t)}$ . Note that:

$$\begin{aligned} \hat{\mu}_P^{(t+1)} &= \frac{1}{N_+(t+1)} \sum_{i=1}^{t+1} \varphi(Z_i) \cdot \mathbb{1}\{W_i = +1\} \\ &= \frac{1}{N_+(t) + 1} \sum_{i=1}^{t+1} \varphi(Z_i) \cdot \mathbb{1}\{W_i = +1\} \\ &= \frac{1}{N_+(t) + 1} \varphi(Z_{t+1}) + \frac{1}{N_+(t) + 1} \sum_{i=1}^t \varphi(Z_i) \cdot \mathbb{1}\{W_i = +1\} \\ &= \frac{1}{N_+(t) + 1} \varphi(Z_{t+1}) + \frac{N_+(t)}{N_+(t) + 1} \hat{\mu}_P^{(t)}. \end{aligned}$$

799 Hence, we have:

$$\begin{aligned} \|\hat{\mu}_P^{(t+1)} - \hat{\mu}_Q^{(t+1)}\|_{\mathcal{G}}^2 &= \|\hat{\mu}_P^{(t+1)} - \hat{\mu}_Q^{(t)}\|_{\mathcal{G}}^2 \\ &= \|\hat{\mu}_P^{(t+1)}\|_{\mathcal{G}}^2 - 2 \langle \hat{\mu}_P^{(t+1)}, \hat{\mu}_Q^{(t)} \rangle_{\mathcal{G}} + \|\hat{\mu}_Q^{(t)}\|_{\mathcal{G}}^2. \end{aligned}$$

800 In particular,

$$\begin{aligned} \langle \hat{\mu}_P^{(t+1)}, \hat{\mu}_Q^{(t)} \rangle_{\mathcal{G}} &= \left\langle \frac{1}{N_+(t) + 1} \varphi(Z_{t+1}) + \frac{N_+(t)}{N_+(t) + 1} \hat{\mu}_P^{(t)}, \hat{\mu}_Q^{(t)} \right\rangle_{\mathcal{G}} \\ &= \frac{1}{N_+(t) + 1} \langle \varphi(Z_{t+1}), \hat{\mu}_Q^{(t)} \rangle_{\mathcal{G}} + \frac{N_+(t)}{N_+(t) + 1} \langle \hat{\mu}_P^{(t)}, \hat{\mu}_Q^{(t)} \rangle_{\mathcal{G}}. \end{aligned}$$

801 Note that:

$$\langle \varphi(Z_{t+1}), \hat{\mu}_Q^{(t)} \rangle_{\mathcal{G}} = \frac{1}{N_-(t)} \sum_{i=1}^t k(Z_{t+1}, Z_i) \cdot \mathbb{1}\{W_i = -1\}.$$

802 Next, we assume for simplicity that  $k(x, x) = 1, \forall x$  which holds for RBF kernel. Observe that:

$$\begin{aligned} \|\hat{\mu}_P^{(t+1)}\|_{\mathcal{G}}^2 &= \langle \hat{\mu}_P^{(t+1)}, \hat{\mu}_P^{(t+1)} \rangle_{\mathcal{G}} \\ &= \frac{1}{(N_+(t) + 1)^2} + \frac{2N_+(t)}{(N_+(t) + 1)^2} \langle \varphi(Z_{t+1}), \hat{\mu}_P^{(t)} \rangle_{\mathcal{G}} + \frac{(N_+(t))^2}{(N_+(t) + 1)^2} \|\hat{\mu}_P^{(t)}\|_{\mathcal{G}}^2. \end{aligned}$$

803 By caching intermediate results, we can compute the normalization constant using linear in  $t$  number  
 804 of kernel evaluations. We start betting once at least one instance is observed from both  $P$  and  $Q$ .  
 805 For simulations, we use RBF kernel and the median heuristic with first 20 instances to compute the  
 806 kernel hyperparameter.

807 **MLP Training Scheme** We begin training after processing twenty datapoints from  $P_{XY}$  which  
 808 gives a training dataset with 40 datapoints (due to randomization). When updating a model, we  
 809 use previous parameters as initialization. We use the following update scheme: we start after next  
 810  $n_0 = 10$  datapoints from  $P_{XY}$  are observed. Once  $n_0$  becomes less than 1% of the size of the  
 811 existing training dataset, we increase it by ten, that is,  $n_t = n_{t-1} + 10$ . When we fit the model, we  
 812 set the maximum number of epochs to be 25 and use early stopping with patience of 3 epochs.

813 **Kernel Hyperparameters for Synthetic Experiments.** For SKIT, we use RBF kernels:

$$k(x, x') = \exp\left(-\lambda_X \|x - x'\|_2^2\right), \quad l(y, y') = \exp\left(-\lambda_Y \|y - y'\|_2^2\right).$$

814 For simulations on synthetic data, we take kernel hyperparameters to be inversely proportional to the  
 815 second moment of the underlying variables (the median heuristic yields similar results):

$$\lambda_X = \frac{1}{2\mathbb{E}[\|X - X'\|_2^2]}, \quad \lambda_Y = \frac{1}{2\mathbb{E}[\|Y - Y'\|_2^2]}.$$

816 1. *Spherical model.* By symmetry, we have:  $P_X = P_Y$ , and hence we take  $\lambda_X = \lambda_Y$ . We have

$$\mathbb{E}[(X - X')^2] = 2\mathbb{E}[X^2] = \frac{2}{d}.$$

817 2. *HTDD model.* By symmetry, we have:  $P_X = P_Y$ , and hence we take  $\lambda_X = \lambda_Y$ . We have

$$\mathbb{E}[(X - X')^2] = 2\mathbb{E}[X^2] = \frac{2\pi^2}{3}.$$

818 3. *Sparse signal model.* We have

$$\begin{aligned} \mathbb{E}[\|X - X'\|_2^2] &= 2\mathbb{E}[\|X\|_2^2] = 4d, \\ \mathbb{E}[\|Y - Y'\|_2^2] &= 2\mathbb{E}[\|Y\|_2^2] = 2\text{tr}(B_s B_s^\top + I_d) = 2(d + \sum_{i=1}^d \beta_i^2). \end{aligned}$$

819 4. *Gaussian model.* We have

$$\begin{aligned} \mathbb{E}[(X - X')^2] &= 2\mathbb{E}[X^2] = 2, \\ \mathbb{E}[(Y - Y')^2] &= 2\mathbb{E}[Y^2] = 2(1 + \beta^2). \end{aligned}$$

820 **Ridge Regression.** We use ridge regression as an underlying predictive model:  $\hat{g}_t(x) = \beta_0^{(t)} + x\beta_1^{(t)}$ ,  
 821 where the coefficients are obtained by solving:

$$(\beta_0^{(t)}, \beta_1^{(t)}) = \arg \min_{\beta_0, \beta_1} \sum_{i=1}^{2(t-1)} (Y_i - X_i \beta_1 - \beta_0)^2 + \lambda \beta_1^2.$$

822 Let  $\Gamma = \text{diag}(0, 1)$ . Let  $\mathbf{X}_{t-1} \in \mathbb{R}^{2(t-1) \times 2}$  be such that  $(\mathbf{X}_{t-1})_i = (1, X_i)$ ,  $i \in [1, 2(t-1)]$ .  
 823 Finally, let  $\mathbf{Y}_{t-1}$  be a vector of responses:  $(\mathbf{Y}_{t-1})_i = Y_i$ ,  $i \in [1, 2(t-1)]$ . Then:

$$\beta^{(t)} = \arg \min_{\beta} \|\mathbf{Y}_{t-1} - \mathbf{X}_{t-1} \beta\|^2 + \lambda \beta^\top \Gamma \beta = (\mathbf{X}_{t-1}^\top \mathbf{X}_{t-1} + \lambda \Gamma)^{-1} (\mathbf{X}_{t-1}^\top \mathbf{Y}_{t-1}).$$

## 824 E.2 Additional Experiments for Seq-C-IT

825 In Figure 6, we present average stopping times for ITs under the synthetic settings from Section 3.  
 826 We confirm that all tests adapt to the complexity of a problem at hand, stopping earlier on easy  
 827 tasks and later on harder ones. We also consider two additional synthetic examples where Seq-C-IT  
 828 outperforms a kernelized approach:

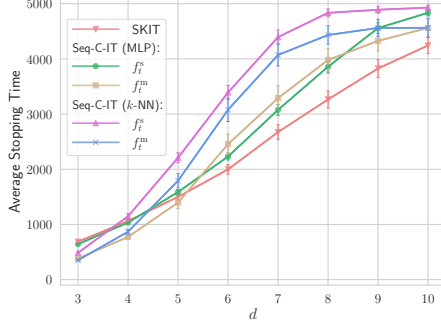

(a) Spherical model.

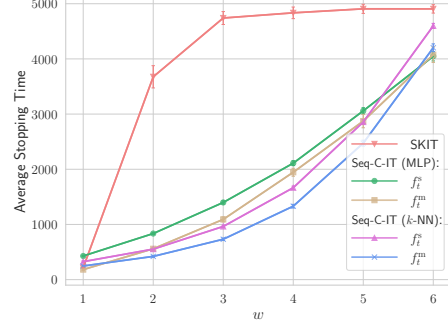

(b) HTDD model.

Figure 6: Stopping times of ITs on synthetic data from Section 3. Subplot (a) shows that SKIT is only marginally better than Seq-C-IT (MLP) due to slightly better sample efficiency under the spherical model (no localized dependence). Under the structured HTDD model, SKIT is inferior to Seq-C-ITs.

829 1. *Sparse signal model.* Let  $(X_t)_{t \geq 1}$  and  $(\varepsilon_t)_{t \geq 1}$  be two independent sequences of standard  
830 Gaussian random vectors in  $\mathbb{R}^d$ :  $X_t, \varepsilon_t \stackrel{\text{iid}}{\sim} \mathcal{N}(0, \mathbf{I}_d)$ ,  $t \geq 1$ . We take

$$(X_t, Y_t) = (X_t, B_s X_t + \varepsilon_t),$$

831 where  $B_s = \text{diag}(\beta_1, \dots, \beta_d)$  and only  $s = 5$  of  $\{\beta_i\}_{i=1}^d$  are nonzero being sampled from  
832  $\text{Unif}([-0.5, 0.5])$ . We consider  $d \in \{5, \dots, 50\}$ .

833 2. *Nested circles model.* Let  $(L_t)_{t \geq 1}$ ,  $(\Theta_t)_{t \geq 1}$ ,  $(\varepsilon_t^{(1)})_{t \geq 1}$ ,  $(\varepsilon_t^{(2)})_{t \geq 1}$  denote sequences of ran-  
834 dom variables where  $L \stackrel{\text{iid}}{\sim} \text{Unif}(1, \dots, l)$  for some prespecified  $l \in \mathbb{N}$ ,  $\Theta_t \stackrel{\text{iid}}{\sim} \text{Unif}([0, 2\pi])$ ,  
835 and  $\varepsilon_t^{(1)}, \varepsilon_t^{(2)} \stackrel{\text{iid}}{\sim} \mathcal{N}(0, (1/4)^2)$ . For  $t \geq 1$ , we take

$$(X_t, Y_t) = (L_t \cos(\Theta_t) + \varepsilon_t^{(1)}, L_t \sin(\Theta_t) + \varepsilon_t^{(2)}). \quad (67)$$

836 We consider  $l \in \{1, \dots, 10\}$ .

837 In Figure 7, we show that Seq-C-ITs significantly outperform SKIT under these models. We note that  
838 the degrading performance of kernel-based tests under the nested circles model (67) has been also  
839 observed in earlier works [Berrett and Samworth, 2019, Podkopaev et al., 2023].

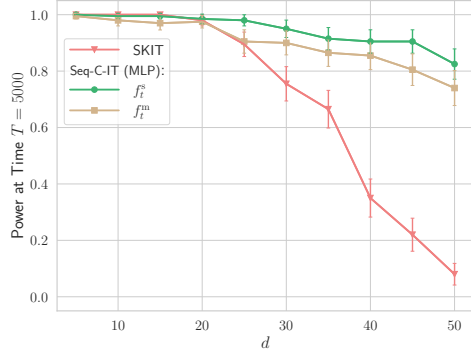

(a) Sparse signal model.

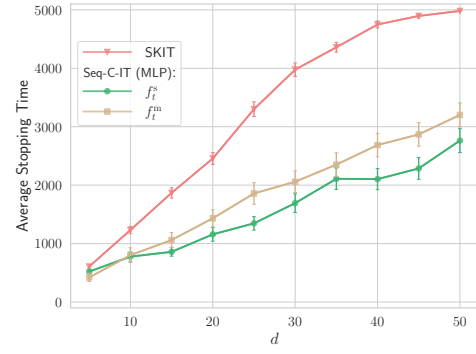

(b) Sparse signal model.

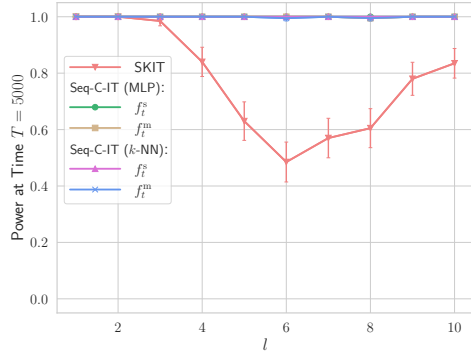

(c) Nested circles model.

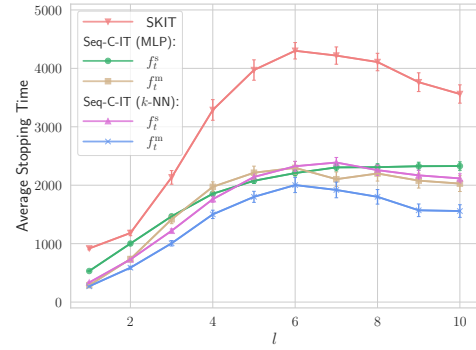

(d) Nested circles model.

Figure 7: Rejection rates (left column) and average stopping times (right column) of sequential ITs for synthetic datasets from Appendix E.2. In both cases, SKIT is inferior to Seq-C-ITs.
