# Supplementary material
Source: ML conference proceedings conference paper supplement (https://openreview.net/forum?id=bN1ZBSOV2f)
Supplement: supplementary_material [file attachment]

---

# Sequential Predictive Two-Sample and Independence Testing

---

Anonymous Author(s)

Affiliation

Address

email

## Abstract

1 We study the problems of sequential nonparametric two-sample and independence  
2 testing. Sequential tests process data online and allow using observed data to  
3 decide whether to stop and reject the null hypothesis or to collect more data, while  
4 maintaining type I error control. We build upon the principle of (nonparametric)  
5 testing by betting, where a gambler places bets on future observations and their  
6 wealth measures evidence against the null hypothesis. While recently developed  
7 kernel-based betting strategies often work well on simple distributions, selecting a  
8 suitable kernel for high-dimensional or structured data, such as images, is often  
9 nontrivial. To address this drawback, we design prediction-based betting strategies  
10 that rely on the following fact: if a sequentially updated predictor starts to consistently  
11 determine (a) which distribution an instance is drawn from, or (b) whether an  
12 instance is drawn from the joint distribution or the product of the marginal distributions  
13 (the latter produced by external randomization), it provides evidence against  
14 the two-sample or independence nulls respectively. We empirically demonstrate the  
15 superiority of our tests over kernel-based approaches under structured settings. Our  
16 tests can be applied beyond the case of independent and identically distributed data,  
17 remaining valid and powerful even when the data distribution drifts over time.

## 18 1 Introduction

19 We consider two closely-related problems of nonparametric two-sample and independence testing. In  
20 the former, given observations from two distributions  $P$  and  $Q$ , the goal is to test the null hypothesis  
21 that the distributions are the same:  $H_0 : P = Q$ , against the alternative that they are not:  $H_1 : P \neq Q$ .  
22 In the latter, given observations from some joint distribution  $P_{XY}$ , the goal is to test the null hypothesis  
23 that the random variables are independent:  $H_0 : P_{XY} = P_X \times P_Y$ , against the alternative that they are  
24 not:  $H_1 : P_{XY} \neq P_X \times P_Y$ . Kernel tests, such as kernel-MMD [Gretton et al., 2012] for two-sample  
25 and HSIC [Gretton et al., 2005] for independence testing, are amongst the most popular methods for  
26 solving these tasks which work well on data from simple distributions. However, their performance is  
27 sensitive to the choice of a kernel and respective parameters, like bandwidth, and applying such tests  
28 requires additional effort. Further, selecting kernels for structured data, like images, is a nontrivial  
29 task. Lastly, kernel tests suffer from decaying power in high dimensions [Ramdas et al., 2015].

30 Predictive two-sample and independence tests (2STs and ITs respectively) aim to address such  
31 limitations of kernelized approaches. The idea of using classifiers for two-sample testing dates back  
32 to Friedman [2004] who proposed using the output scores as a dimension reduction method. More  
33 recent works focused on the direct evaluation of a learned model for testing. In an initial arXiv  
34 2016 preprint, Kim et al. [2021] proposed and analyzed predictive 2STs based on sample-splitting,  
35 namely testing whether the accuracy of a model trained on the first split of data and estimated  
36 on the second split is significantly better than chance. The authors established the consistency of

asymptotic and exact tests in high-dimensional settings and provided rates for the case of Gaussian distributions. Inspired by this work, Lopez-Paz and Oquab [2017] soon after demonstrated that empirically predictive 2STs often outperform state-of-the-art 2STs, such as kernel-MMD. Recently, Hediger et al. [2022] proposed a related test that utilizes out-of-bag predictions for bagging-based classifiers, such as random forests. To incorporate measures of model confidence, many authors have also explored using test statistics that are based on the output scores instead of the binary class predictions [Kim et al., 2019, Liu et al., 2020, Cheng and Cloninger, 2022, Kübler et al., 2022].

The focus of the above works is on *batch* tests which are calibrated to have a fixed false positive rate (say, 5%) if the sample size is specified in advance. In contrast, we focus on the setting of sequentially released data. Our tests allow on-the-fly decision-making: an analyst can use observed data to decide whether to stop and reject the null or to collect more data, without inflating the false alarm rate.

**Problem Setup.** First, we define the problems of sequential two-sample and independence testing.

**Definition 1** (Sequential two-sample testing). Suppose that we observe a stream of i.i.d. observations  $((Z_t, W_t))_{t \geq 1}$ , where  $W_t \sim \text{Rademacher}(1/2)$ , the distribution of  $Z_t \mid W_t = +1$  is denoted  $P$ , and that of  $Z_t \mid W_t = -1$  is denoted  $Q$ . The goal is to design a sequential test for

$$H_0 : P = Q, \quad (1a)$$

$$H_1 : P \neq Q. \quad (1b)$$

**Definition 2** (Sequential independence testing). Suppose that we observe a stream of observations:  $((X_t, Y_t))_{t \geq 1}$ , where  $(X_t, Y_t) \sim P_{XY}$  for  $t \geq 1$ . The goal is to design a sequential test for

$$H_0 : (X_t, Y_t) \sim P_{XY} \text{ and } P_{XY} = P_X \times P_Y, \quad (2a)$$

$$H_1 : (X_t, Y_t) \sim P_{XY} \text{ and } P_{XY} \neq P_X \times P_Y. \quad (2b)$$

We operate in the framework of “power-one tests” [Darling and Robbins, 1968] and define a level- $\alpha$  sequential test as a mapping  $\Phi : \cup_{t=1}^{\infty} \mathcal{Z}^t \rightarrow \{0, 1\}$  that satisfies:  $\mathbb{P}_{H_0}(\exists t \geq 1 : \Phi(Z_1, \dots, Z_t) = 1) \leq \alpha$ . We refer to such notion of type I error control as *time-uniform*. Here, 0 stands for “do not reject the null yet” and 1 stands for “reject the null and stop”. Defining the stopping time as the first time that the test outputs 1:  $\tau := \inf\{t \geq 1 : \Phi(Z_1, \dots, Z_t) = 1\}$ , a sequential test must satisfy

$$\mathbb{P}_{H_0}(\tau < \infty) \leq \alpha. \quad (3)$$

We aim to design *consistent* tests which are guaranteed to stop if the alternative happens to be true:

$$\mathbb{P}_{H_1}(\tau < \infty) = 1. \quad (4)$$

Our construction follows the principle of testing by betting [Shafer, 2021]. The most closely related work is that of “nonparametric 2ST by betting” of Shekhar and Ramdas [2021], which later inspired several follow-up works, including sequential (marginal) kernelized independence tests of Podkopaev et al. [2023], and the sequential conditional independence tests under the model-X assumption of Grünwald et al. [2023] and Shaer et al. [2023]. We extend the line of work of Shekhar and Ramdas [2021] and of Podkopaev et al. [2023], studying predictive approaches in detail.

Sequential predictive 2STs have been studied by Lhéritier and Cazals [2018, 2019], but in practice, those tests were found to be inferior to the ones developed by Shekhar and Ramdas [2021]. Recently, Pandeva et al. [2022] proposed a related test that handles the case of the unknown class proportions using ideas from [Wasserman et al., 2020]. As we shall see, our tests are closely related to [Lhéritier and Cazals, 2018, 2019, Pandeva et al., 2022], but are consistent under much milder assumptions.

**Sequential Nonparametric Two-Sample and Independence Testing by Betting.** Suppose that one observes a sequence of random variables  $(Z_t)_{t \geq 1}$ , where  $Z_t \in \mathcal{Z}$ . The principle of testing by betting [Shafer and Vovk, 2019, Shafer, 2021] can be described as follows. A player starts the game with initial capital  $\mathcal{K}_0 = 1$ . At round  $t$ , she selects a payoff function  $f_t : \mathcal{Z} \rightarrow [-1, \infty)$  that satisfies  $\mathbb{E}_{Z \sim P_Z}[f_t(Z) \mid \mathcal{F}_{t-1}] = 0$  for all  $P_Z \in H_0$ , where  $\mathcal{F}_{t-1} = \sigma(Z_1, \dots, Z_{t-1})$ , and bets a fraction of her wealth  $\lambda_t \mathcal{K}_{t-1}$  for an  $\mathcal{F}_{t-1}$ -measurable  $\lambda_t \in [0, 1]$ . Once  $Z_t$  is revealed, her wealth is updated as

$$\mathcal{K}_t = \mathcal{K}_{t-1} + \lambda_t \mathcal{K}_{t-1} f_t(Z_t) = \mathcal{K}_{t-1} (1 + \lambda_t f_t(Z_t)). \quad (5)$$

The wealth of a player measures evidence against the null hypothesis, and if a player can make money in such game, we reject the null. For testing  $H_0$  at level  $\alpha \in (0, 1)$ , we use the stopping rule:

$$\tau = \inf\{t \geq 1 : \mathcal{K}_t \geq 1/\alpha\}. \quad (6)$$

The validity of the test follows from Ville’s inequality [Ville, 1939], a time-uniform generalization of Markov’s inequality, since  $(\mathcal{K}_t)_{t \geq 0}$  is a nonnegative martingale under any  $P_Z \in H_0$ . To ensure high power, one has to choose  $(f_t)_{t \geq 1}$  and  $(\lambda_t)_{t \geq 1}$  to guarantee the growth of the wealth if the alternative is true. In the context of two-sample and independence testing, Shekhar and Ramdas [2021] and Podkopaev et al. [2023] recently proposed effective betting strategies based on kernelized measures of statistical distance and dependence respectively which admit a variational representation. In a nutshell, datapoints observed prior to a given round are used to estimate the *witness* function — one that best highlights the discrepancy between  $P$  and  $Q$  for two-sample (or between  $P_{XY}$  and  $P_X \times P_Y$  for independence) testing — and a bet is formed as an estimator of a chosen measure of distance (or dependence). In contrast, our bets are based on evaluating the performance of a sequentially learned predictor that distinguishes between instances from distributions of interest.

*Remark 1.* In practical settings, an analyst may not be able to continue collecting data forever and may adaptively stop the experiment before the wealth exceeds  $1/\alpha$ . In such case, one may use a different threshold for rejecting the null at a stopping time  $\tau$ , namely  $U/\alpha$ , where  $U$  is a (stochastically larger than) uniform random variable on  $[0, 1]$  drawn independently from  $(\mathcal{F}_t)_{t \geq 0}$ . This choice strictly improves the power of the test without violating the validity; see [Ramdas and Manole, 2023].

**Contributions.** We develop sequential predictive two-sample (Section 2) and independence (Section 3) tests. We establish sufficient conditions for consistency of our tests and relate those to evaluation metrics of the underlying models. We conduct an extensive empirical study on synthetic and real data, justifying the superiority of our tests over the kernelized ones on structured data.

## 2 Classification-based Two-Sample Testing

Let  $\mathcal{G} : \mathcal{Z} \rightarrow [-1, 1]$  denote a class of predictors used to distinguish between instances from  $P$  (labeled as  $+1$ ) and  $Q$  (labeled as  $-1$ )<sup>1</sup>. We assume that: (a) if  $g \in \mathcal{G}$ , then  $-g \in \mathcal{G}$ , (b) if  $g \in \mathcal{G}$  and  $s \in [0, 1]$ , then  $sg \in \mathcal{G}$ , and (c) predictions are based on  $\text{sign}[g(\cdot)]$ , and if  $g(z) = 0$ , then  $z$  is assigned to the positive class. Two natural evaluation metrics of a predictor  $g \in \mathcal{G}$  include the misclassification and the squared risks:

$$R_m(g) := \mathbb{P}(W \cdot \text{sign}[g(Z)] < 0), \quad R_s(g) := \mathbb{E}[(g(Z) - W)^2], \quad (7)$$

which give rise to the following measures of distance between  $P$  and  $Q$ , namely

$$d_m(P, Q) := \sup_{g \in \mathcal{G}} \left( \frac{1}{2} - R_m(g) \right), \quad d_s(P, Q) := \sup_{g \in \mathcal{G}} (1 - R_s(g)). \quad (8)$$

It is easy to check that  $d_m(P, Q) \in [0, 1/2]$  and  $d_s(P, Q) \in [0, 1]$ . The upper bounds hold due to the non-negativity of the risks and the lower bounds follow by considering  $g : g(z) = 0, \forall z \in \mathcal{Z}$ . Note that the misclassification risk is invariant to rescaling ( $R_m(sg) = R_m(g), \forall s \in (0, 1]$ ), whereas the squared risk is not, and rescaling any  $g$  to optimize the squared risk provides better contrast between  $P$  and  $Q$ . In the next result, whose proof is deferred to Appendix D.3, we present an important relationship between the squared risk of a rescaled predictor and its expected margin:  $\mathbb{E}[W \cdot g(Z)]$ .

**Proposition 1.** Fix an arbitrary predictor  $g \in \mathcal{G}$ . The following claims hold:

1. For the misclassification risk, we have that:

$$\sup_{s \in [0, 1]} \left( \frac{1}{2} - R_m(sg) \right) = \left( \frac{1}{2} - R_m(g) \right) \vee 0 = \left( \frac{1}{2} \cdot \mathbb{E}[W \cdot \text{sign}[g(Z)]] \right) \vee 0. \quad (9)$$

2. For the squared risk, we have that:

$$\sup_{s \in [0, 1]} (1 - R_s(sg)) \geq (\mathbb{E}[W \cdot g(Z)] \vee 0) \cdot \left( \frac{\mathbb{E}[W \cdot g(Z)]}{\mathbb{E}[g^2(Z)]} \wedge 1 \right) \quad (10)$$

Further,  $d_s(P, Q) > 0$  if and only if there exists  $g \in \mathcal{G}$  such that  $\mathbb{E}[W \cdot g(Z)] > 0$ .

Consider an arbitrary predictor  $g \in \mathcal{G}$ . Note that under the null  $H_0$  in (1a), the misclassification risk  $R_m(g)$  does not depend on  $g$ , being equal to  $1/2$ , whereas the squared risk  $R_s(g)$  does. In contrast, the lower bound (10) no longer depends on  $g$  under the null  $H_0$ , being equal to 0.

<sup>1</sup>Similar argument can be applied to general scoring-based classifiers:  $g : \mathcal{Z} \rightarrow \mathbb{R}$ , e.g., SVMs, by considering  $\tilde{g} = \{\tilde{g} : \tilde{g}(z) = \tanh(s \cdot g(z)), g \in \mathcal{G}, s > 0\}$ , where the constant  $s > 0$  corrects the scale of the scores.

119 **Oracle Test.** It is a known fact that the minimizer of either the misclassification or the squared risk is  
 120  $g^{\text{Bayes}}(z) = 2\eta(z) - 1$ , where  $\eta(z) = \mathbb{P}(W = +1 \mid Z = z)$ . Since  $g^{\text{Bayes}}$  may not belong to  $\mathcal{G}$ , we  
 121 consider  $g_\star \in \mathcal{G}$ , which minimizes either the misclassification or the squared risk over predictors in  $\mathcal{G}$ ,  
 122 and omit superscripts for brevity. To design payoff functions, we follow Proposition 1 and consider

$$f_\star^{\text{m}}(Z_t, W_t) = W_t \cdot \text{sign}[g_\star(Z_t)] \in \{-1, 1\}, \quad (11a)$$

$$f_\star^{\text{s}}(Z_t, W_t) = W_t \cdot g_\star(Z_t) \in [-1, 1]. \quad (11b)$$

123 Let the *oracle* wealth processes based on misclassification and squared risks  $(\mathcal{K}_t^{\text{m},\star})_{t \geq 0}$  and  $(\mathcal{K}_t^{\text{s},\star})_{t \geq 0}$   
 124 be defined by using the payoff functions (11a) and (11b) respectively, along with a predictable  
 125 sequence of betting fractions  $(\lambda_t)_{t \geq 1}$  selected via online Newton step (ONS) strategy [Hazan et al.,  
 126 2007] (Algorithm 1), which has been studied in the context of coin-betting by Cutkosky and Orabona  
 127 [2018]. If a constant betting fraction is used throughout:  $\lambda_t = \lambda, \forall t$ , then

$$\mathbb{E} \left[ \frac{1}{t} \log \mathcal{K}_t^{i,\star} \right] = \mathbb{E} [\log(1 + \lambda f_\star^i(Z, W))] , \quad i \in \{\text{m}, \text{s}\}. \quad (12)$$

128 To illustrate the tightness of our results, we consider the optimal constant betting fractions which  
 129 maximize the log-wealth (12) and are constrained to lie in  $[-0.5, 0.5]$ , like ONS bets:

$$\lambda_\star^i = \arg \max_{\lambda \in [-0.5, 0.5]} \mathbb{E} [\log(1 + \lambda f_\star^i(Z, W))] , \quad i \in \{\text{m}, \text{s}\}. \quad (13)$$

---

**Algorithm 1** Online Newton step (ONS) strategy for selecting betting fractions

---

**Input:** sequence of payoffs  $(f_t)_{t \geq 1}$ ,  $\lambda_1^{\text{ONS}} = 0$ ,  $a_0 = 1$ .

**for**  $t = 1, 2, \dots$  **do**

    Observe  $f_t \in [-1, 1]$ ;

    Set  $z_t := f_t / (1 - \lambda_t^{\text{ONS}})$ ;

    Set  $a_t := a_{t-1} + z_t^2$ ;

    Set  $\lambda_{t+1}^{\text{ONS}} := \frac{1}{2} \wedge \left( 0 \vee \left( \lambda_t^{\text{ONS}} - \frac{2}{2 - \log 3} \cdot \frac{z_t}{a_t} \right) \right)$ ;

---

130 We have the following result for the oracle tests, whose proof is deferred to Appendix D.3.

131 **Theorem 1.** *The following claims hold:*

132 1. *Suppose that  $H_0$  in (1a) is true. Then the oracle sequential test based on either  $(\mathcal{K}_t^{\text{m},\star})_{t \geq 0}$*   
 133 *or  $(\mathcal{K}_t^{\text{s},\star})_{t \geq 0}$  ever stops with probability at most  $\alpha$ :  $\mathbb{P}_{H_0}(\tau < \infty) \leq \alpha$ .*

134 2. *Suppose that  $H_1$  in (1b) is true. Then:*

135 (a) *The growth rate of the oracle wealth process  $(\mathcal{K}_t^{\text{m},\star})_{t \geq 0}$  satisfies:*

$$\liminf_{t \rightarrow \infty} \left( \frac{1}{t} \log \mathcal{K}_t^{\text{m},\star} \right) \stackrel{\text{a.s.}}{\geq} \left( \frac{1}{2} - R_{\text{m}}(g_\star) \right)^2. \quad (14)$$

136 *If  $R_{\text{m}}(g_\star) < 1/2$ , then the test based on  $(\mathcal{K}_t^{\text{m},\star})_{t \geq 0}$  is consistent:  $\mathbb{P}_{H_1}(\tau < \infty) = 1$ .*  
 137 *Further, the optimal growth rate achieved by  $\lambda_\star^{\text{m}}$  in (13) satisfies:*

$$\mathbb{E} [\log(1 + \lambda_\star^{\text{m}} f_\star^{\text{m}}(Z, W))] \leq \left( \frac{16}{3} \cdot \left( \frac{1}{2} - R_{\text{m}}(g_\star) \right)^2 \wedge \left( \frac{1}{2} - R_{\text{m}}(g_\star) \right) \right). \quad (15)$$

138 (b) *The growth rate of the oracle wealth process  $(\mathcal{K}_t^{\text{s},\star})_{t \geq 0}$  satisfies:*

$$\liminf_{t \rightarrow \infty} \left( \frac{1}{t} \log \mathcal{K}_t^{\text{s},\star} \right) \stackrel{\text{a.s.}}{\geq} \frac{1}{4} \cdot \mathbb{E} [W \cdot g_\star(Z)]. \quad (16)$$

139 *If  $\mathbb{E} [W \cdot g_\star(Z)] > 0$ , then the test based on  $(\mathcal{K}_t^{\text{s},\star})_{t \geq 0}$  is consistent:  $\mathbb{P}_{H_1}(\tau < \infty) = 1$ .*  
 140 *1. Further, the optimal growth rate achieved by  $\lambda_\star^{\text{s}}$  in (13) satisfies:*

$$\mathbb{E} [\log(1 + \lambda_\star^{\text{s}} f_\star^{\text{s}}(Z, W))] \leq \frac{1}{2} \cdot \mathbb{E} [W \cdot g_\star(Z)]. \quad (17)$$

141 Theorem 1 precisely characterizes the properties of the oracle wealth processes and relates those to  
 142 interpretable metrics of predictive performance. Further, the proof of Theorem 1 highlights a direct

143 impact of the variance of the payoffs on the wealth growth rate, and hence the power of the resulting  
 144 sequential tests (as the null is rejected once the wealth exceeds  $1/\alpha$ ).

145 The second moment of the payoffs based on the misclassification risk (11a) is equal to one, resulting  
 146 in a *slow* growth: the bound (14) is proportional to *squared* deviation of the misclassification risk  
 147 from one half. The bound (15) shows that the growth rate with the ONS strategy matches, up to  
 148 constants, that of the oracle betting fraction. Note that the second term in (15) characterizes the  
 149 growth rate if  $R_m(g_*) < 5/16$  (low Bayes risk). In this regime, the growth rate of our test is at least  
 150  $(3/16) \cdot (1/2 - R_m(g_*))$  which is close to the optimal rate. The second moment of the payoffs based  
 151 on the squared risk is more insightful. First, we present a result for the case when the oracle predictor  
 152  $g_*$  in (11b) is replaced by an arbitrary  $g \in \mathcal{G}$ . The proof is deferred to Appendix D.3.

153 **Corollary 1.** Consider an arbitrary  $g \in \mathcal{G}$  with nonnegative expected margin:  $\mathbb{E}[W \cdot g(Z)] \geq 0$ .  
 154 Then the growth rate of the corresponding wealth process  $(\mathcal{K}_t^s)_{t \geq 0}$  satisfies:

$$\liminf_{t \rightarrow \infty} \left( \frac{1}{t} \log \mathcal{K}_t^s \right) \stackrel{\text{a.s.}}{\geq} \frac{1}{4} \left( \sup_{s \in [0,1]} (1 - R_s(sg)) \wedge \mathbb{E}[W \cdot g(Z)] \right) \quad (18a)$$

$$\geq \frac{1}{4} (\mathbb{E}[W \cdot g(Z)])^2, \quad (18b)$$

155 and the optimal growth rate achieved by  $\lambda_*^s$  in (13) satisfies:

$$\mathbb{E}[\log(1 + \lambda_*^s f^s(Z, W))] \leq \left( \frac{4}{3} \cdot \sup_{s \in [0,1]} (1 - R_s(sg)) \right) \wedge \left( \frac{1}{2} \cdot \mathbb{E}[W \cdot g(Z)] \right). \quad (19)$$

156 Corollary 1 states that for an arbitrary  $g \in \mathcal{G}$ , the growth rate is lower bounded by the minimum  
 157 of the expected margin and the (optimized) squared risk of such predictor. While the latter term is  
 158 always smaller for the optimal  $g_*$ , this may not hold for an arbitrary  $g \in \mathcal{G}$ . The lower bound (18b),  
 159 which follows from Proposition 1, is always worse than that for  $g_*$  (the expected margin is squared).  
 160 The upper bound (19) shows that the growth rate with the ONS strategy matches, up to constants,  
 161 that of the optimal constant betting fraction. Before presenting a practical sequential 2ST, we provide  
 162 two important remarks that further contextualize the current work in the literature.

163 **Remark 2.** In practice, we learn a predictor sequentially and have to choose a learning algorithm.  
 164 Note that (18a) suggests that direct margin maximization may hurt the power of the resulting 2ST:  
 165 the squared risk is sensitive to miscalibrated and overconfident predictors. Kübler et al. [2022] made  
 166 a similar conjecture in the context of batch two-sample testing. To optimize the power, the authors  
 167 suggested minimizing the cross-entropy or the squared loss and related such approach to maximizing  
 168 the signal-to-noise ratio, a heuristic approach that was proposed earlier by Sutherland et al. [2017]<sup>2</sup>.

169 **Remark 3.** Suppose that  $g^{\text{Bayes}} \in \mathcal{G}$  and consider the payoff function based on the squared risk (11b).  
 170 At round  $t$ , the wealth of a player  $\mathcal{K}_{t-1}$  is multiplied by

$$\begin{aligned} 1 + \lambda_t \cdot W_t \cdot g^{\text{Bayes}}(Z_t) &= (1 - \lambda_t) \cdot 1 + \lambda_t \cdot (1 + W_t \cdot g^{\text{Bayes}}(Z_t)) \\ &= (1 - \lambda_t) \cdot 1 + \lambda_t \cdot \frac{(\eta(Z_t))^{\mathbb{1}\{W_t=1\}} (1 - \eta(Z_t))^{\mathbb{1}\{W_t=-1\}}}{\left(\frac{1}{2}\right)^{\mathbb{1}\{W_t=1\}} \left(\frac{1}{2}\right)^{\mathbb{1}\{W_t=-1\}}}, \end{aligned} \quad (20)$$

171 and hence, the betting fractions interpolate between the regimes of not betting and betting using a  
 172 likelihood ratio. From this standpoint, 2STs of Lhéritier and Cazals [2018, 2019], Pandeva et al.  
 173 [2022] set  $\lambda_t = 1, \forall t$ , and use only the second term for updating the wealth despite the fact that the  
 174 true likelihood ratio is unknown. An argument about the consistency of such test hence requires  
 175 imposing strong assumptions about a sequence of predictors  $(g_t)_{t \geq 1}$  [Lhéritier and Cazals, 2018,  
 176 2019]. Our test differs in a critical way: we use a sequence of betting fractions,  $(\lambda_t)_{t \geq 1}$ , which adapts  
 177 to the quality of the underlying predictors, yielding a consistent test under much weaker assumptions.

178 **Example 1.** Consider  $P = \mathcal{N}(0, 1)$  and  $Q = \mathcal{N}(\delta, 1)$  for 20 values of  $\delta$ , equally spaced in  $[0, 0.5]$ .  
 179 For a given  $\delta$ , the Bayes-optimal predictor is

$$g^{\text{Bayes}}(z) = \frac{\varphi(z; 0, 1) - \varphi(z; \delta, 1)}{\varphi(z; 0, 1) + \varphi(z; \delta, 1)} \in [-1, 1], \quad (21)$$

180 where  $\varphi(z; \mu, \sigma^2)$  denotes the density of  $\mathcal{N}(\mu, \sigma^2)$  evaluated at  $z$ . In Figure 1a, we compare tests  
 181 that use (a) the Bayes-optimal predictor, (b) a predictor constructed with the plug-in estimates of  
 182 the means and variances. While in the former case betting using a likelihood ratio ( $\lambda_t = 1, \forall t$ ) is

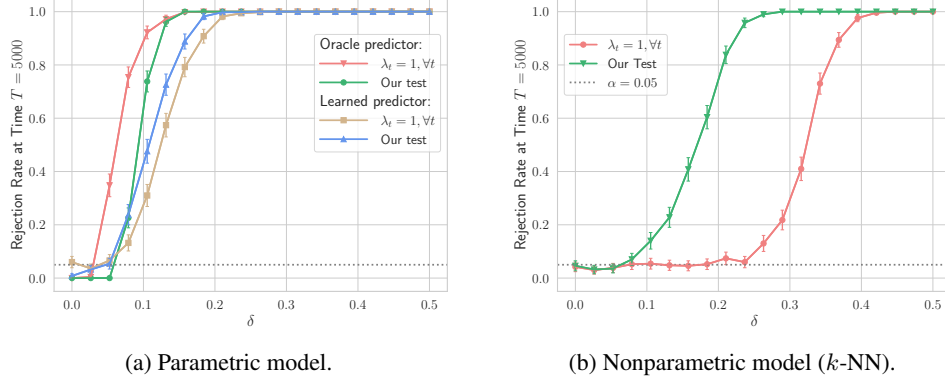

Figure 1: Comparison between our 2ST with adaptive betting fractions and the likelihood ratio test for Example 1. While the likelihood ratio test is better if the Bayes-optimal predictor is used, our test is superior if a predictor is learned. The results are aggregated over 500 runs for each value of  $\delta$ .

indeed optimal, our test with an adaptive sequence  $(\lambda_t)_{t \geq 1}$  is superior when a predictor is learned. The difference becomes even more drastic in Figure 1b where a (regularized)  $k$ -NN predictor is used.

**Practical Test.** Let  $\mathcal{A}_c : (\cup_{t \geq 1} (\mathcal{Z} \times \{-1, +1\}))^t \times \mathcal{G} \rightarrow \mathcal{G}$  denote a learning algorithm which maps a training dataset of any size and previously used classifier, to an updated predictor. For example,  $\mathcal{A}_c$  may apply a single gradient descent step using the most recent observation to update a model. We start with  $\mathcal{D}_0 = \emptyset$  and  $g_1 \in \mathcal{G} : g_1(z) = 0$ , for any  $z \in \mathcal{Z}$ . At round  $t$ , we use one of the payoffs:

$$f_t^m(Z_t, W_t) = W_t \cdot \text{sign}[g_t(Z_t)] \in \{-1, 1\}, \quad (22a)$$

$$f_t^s(Z_t, W_t) = W_t \cdot g_t(Z_t) \in [-1, 1]. \quad (22b)$$

After  $(Z_t, W_t)$  is used for betting, we update a training dataset:  $\mathcal{D}_t = \mathcal{D}_{t-1} \cup \{(Z_t, W_t)\}$ , and an existing predictor:  $g_{t+1} = \mathcal{A}_c(\mathcal{D}_t, g_t)$ . We summarize our sequential classification-based 2ST (Seq-C-2ST) in Algorithm 2. While we do not need any assumptions to confirm the type I error control, we place some mild assumptions on the learning algorithm  $\mathcal{A}_c$  to argue about the consistency.

---

**Algorithm 2** Sequential classification-based 2ST (Seq-C-2ST)

---

**Input:** level  $\alpha \in (0, 1)$ , data stream  $((Z_t, W_t))_{t \geq 1}$ ,  $g_1(z) \equiv 0$ ,  $\mathcal{A}_c$ ,  $\mathcal{D}_0 = \emptyset$ ,  $\lambda_1^{\text{ONS}} = 0$ .

**for**  $t = 1, 2, \dots$  **do**

    Evaluate the payoff  $f_t^s(Z_t, W_t)$  as in (22a);

    Using  $\lambda_t^{\text{ONS}}$ , update the wealth process  $\mathcal{K}_t^s$  as per (5);

**if**  $\mathcal{K}_t^s \geq 1/\alpha$  **then**

        Reject  $H_0$  and stop;

**else**

        Update the training dataset:  $\mathcal{D}_t := \mathcal{D}_{t-1} \cup \{(Z_t, W_t)\}$ ;

        Update predictor:  $g_{t+1} = \mathcal{A}_c(\mathcal{D}_t, g_t)$ ;

        Compute  $\lambda_{t+1}^{\text{ONS}}$  (Algorithm 1) using  $f_t^s(Z_t, W_t)$ ;

**Assumption 1** ( $R_m$ -learnability). Suppose that  $H_1$  in (1b) is true. An algorithm  $\mathcal{A}_c$  is such that the resulting sequence  $(g_t)_{t \geq 1}$  satisfies:  $\limsup_{t \rightarrow \infty} \frac{1}{t} \sum_{i=1}^t \mathbb{1}\{W_i \cdot \text{sign}[g_i(Z_i)] < 0\} \stackrel{\text{a.s.}}{<} 1/2$ .

**Assumption 2** ( $R_s$ -learnability). Suppose that  $H_1$  in (1b) is true. An algorithm  $\mathcal{A}_c$  is such that the resulting sequence  $(g_t)_{t \geq 1}$  satisfies:  $\limsup_{t \rightarrow \infty} \frac{1}{t} \sum_{i=1}^t (g_i(Z_i) - W_i)^2 \stackrel{\text{a.s.}}{<} 1$ .

In words, the above assumptions state that a sequence of predictors  $(g_t)_{t \geq 1}$  is better than a chance predictor on average. We conclude with the following result, whose proof is deferred to Appendix D.3.

**Theorem 2.** The following claims hold for Seq-C-2ST (Algorithm 2):

1. If  $H_0$  in (1a) is true, the test ever stops with probability at most  $\alpha$ :  $\mathbb{P}_{H_0}(\tau < \infty) \leq \alpha$ .

---

<sup>2</sup>Standard CLT does not apply directly when the conditioning set grows; see [Kim and Ramdas, 2020].

2. Suppose that  $H_1$  in (1b) is true. Then:

- (a) Under Assumption 1, the test with the payoff (22a) is consistent:  $\mathbb{P}_{H_1}(\tau < \infty) = 1$ .
- (b) Under Assumption 2, the test with the payoff (22b) is consistent:  $\mathbb{P}_{H_1}(\tau < \infty) = 1$ .

**Real Data Experiment.** To compare sequential classification-based and kernelized 2STs, we consider Karolinska Directed Emotional Faces dataset (KDEF) [Lundqvist et al., 1998] that contains images of actors and actresses expressing different emotions: afraid (AF), angry (AN), disgusted (DI), happy (HA), neutral (HE), sad (SA), and surprised (SU). Following earlier works [Lopez-Paz and Oquab, 2017, Jitkrittum et al., 2016], we focus on straight profile only and assign HA, NE, SU emotions to the positive class (instances from  $P$ ), and AF, AN, DI emotions to the negative class (instances from  $Q$ ); see Figure 2a. We remove corrupted images and obtain a dataset containing 802 images with six different emotions. The original images ( $562 \times 762$  pixels) are cropped to exclude the background, resized to  $64 \times 64$  pixels and converted to grayscale.

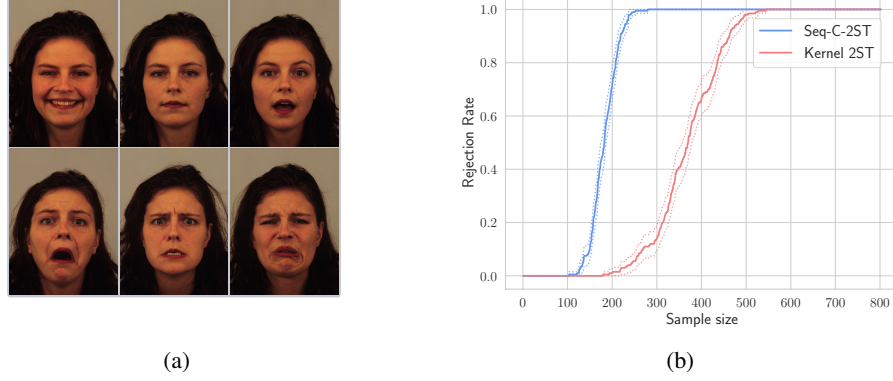

Figure 2: (a) Examples of instances from  $P$  (top row) and  $Q$  (bottom row) for KDEF dataset. (b) Rejection rates for our test (Seq-C-2ST) and the sequential kernelized 2ST. While both tests achieve perfect power with enough data, our test is superior to the kernelized approach, requiring fewer observations to do so. The results are averaged over 200 random orderings of the data.

For Seq-C-2ST, we use a small CNN as an underlying model and defer details about the architecture and training to Appendix E.1. As a reference kernel-based 2ST, we use the sequential MMD test of Shekhar and Ramdas [2021] and adapt it to the setting where at each round either an observation from  $P$  or that from  $Q$  is revealed; see Appendix E.1 for details. In Figure 2b, we illustrate that while both tests achieve perfect power after processing sufficiently many observations, our Seq-C-2ST requires fewer observations to do so.

### 3 Classification-based Independence Testing

**Sequential Classification-based Independence Test (Seq-C-IT).** Under the setting of Definition 2, a single point from  $P_{XY}$  is revealed at each round. Following [Podkopaev et al., 2023], we bet on two points from  $P_{XY}$  (labeled as  $+1$ ) and utilize external randomization to produce instances from  $P_X \times P_Y$  (labeled as  $-1$ ). Let  $\mathcal{A}_c^{\text{IT}} : (\cup_{t \geq 1} ((\mathcal{X} \times \mathcal{Y}) \times \{-1, +1\})^t) \times \mathcal{G} \rightarrow \mathcal{G}$  denote a learning algorithm which maps a training dataset of any size and previously used classifier, to an updated predictor. We start with  $\mathcal{D}_0 = \emptyset$  and  $g_1 : g_1(x, y) = 0, \forall (x, y) \in \mathcal{X} \times \mathcal{Y}$ . We use derandomized versions of the payoffs (22), e.g., instead of (22b), we use

$$f_t^s((X_{2t-1}, Y_{2t-1}), (X_{2t}, Y_{2t})) = \frac{1}{4} (g_t(X_{2t-1}, Y_{2t-1}) + g_t(X_{2t}, Y_{2t})) - \frac{1}{4} (g_t(X_{2t-1}, Y_{2t}) + g_t(X_{2t}, Y_{2t-1})). \quad (23)$$

After  $(X_{2t-1}, Y_{2t-1}), (X_{2t}, Y_{2t})$  have been used for betting, we update a training dataset:

$$\mathcal{D}_t = \mathcal{D}_{t-1} \cup \{((X_{2t-1}, Y_{2t-1}), +1), ((X_{2t}, Y_{2t}), +1), ((X_{2t-1}, Y_{2t}), -1), ((X_{2t}, Y_{2t-1}), -1)\},$$

and an existing predictor:  $g_{t+1} = \mathcal{A}_c^{\text{IT}}(\mathcal{D}_t, g_t)$ . Seq-C-IT inherits the time-uniform type I error control and the consistency guarantees of Theorem 2, and we omit details for brevity.

**Synthetic Experiments.** In our evaluation, we first consider synthetic datasets where the complexity of the independence testing setup is characterized by a single univariate parameter. We set the monitoring horizon to  $T = 5000$  points from  $P_{XY}$ , and for each parameter value, we aggregate the results over 200 runs. In particular, we use the following synthetic settings:

1. *Spherical model.* Let  $(U_t)_{t \geq 1}$  be a sequence of random vectors on a unit sphere in  $\mathbb{R}^d$ :  $U_t \stackrel{\text{iid}}{\sim} \text{Unif}(\mathbb{S}^d)$ , and let  $u_{(i)}$  denote the  $i$ -th coordinate of  $u$ . For  $t \geq 1$ , we take

$$(X_t, Y_t) = ((U_t)_{(1)}, (U_t)_{(2)}).$$

We consider  $d \in \{3, \dots, 10\}$ , where larger  $d$  defines a harder setup.

2. *Hard-to-detect-dependence (HTDD) model.* We sample  $((X_t, Y_t))_{t \geq 1}$  from

$$p(x, y) = \frac{1}{4\pi^2} (1 + \sin(wx) \sin(wy)) \cdot \mathbb{1}\{(x, y) \in [-\pi, \pi]^2\}. \quad (24)$$

We consider  $w \in \{0, \dots, 6\}$ , where  $H_0$  is true (random variables are independent) if and only if  $w = 0$ . For  $w > 0$ ,  $\text{Corr}(X, Y) \approx 1/w^2$ , and the setup is harder for larger  $w$ .

For the comparison, we use two predictive models to construct Seq-C-ITs:

1. Let  $\mathcal{N}_t(z) := \mathcal{N}(z, \mathcal{D}_{t-1}, k_t)$  define the set of  $k_t$  closest points in  $\mathcal{D}_{t-1}$  to a query point  $z := (x, y)$ . We consider a *regularized*  $k$ -NN predictor:  $\hat{g}_t(z) = \frac{1}{k_t+1} \sum_{(Z, W) \in \mathcal{N}_t(z)} W$ . We select the number of neighbors using the square-root rule:  $k_t = \sqrt{|\mathcal{D}_{t-1}|} = \sqrt{4(t-1)}$ .
2. We use a multilayer perceptron (MLP) with three hidden layers and 128, 64 and 32 neurons respectively and the parameters learned using an incremental training scheme.

We use the HSIC-based sequential kernelized independence test (SKIT) [Podkopaev et al., 2023] as a reference test and defer details, such as MLP training scheme and SKIT hyperparameters, to Appendix E.1. In Figure 3, we observe that SKIT outperforms Seq-C-ITs under the spherical model (with no localized dependence structure), whereas, under the structured HTDD model, Seq-C-ITs is superior. Further, inspecting Figure 3b at  $w = 0$  confirms that all tests control the type I error. We refer the reader to Appendix E.2 for additional experiments on synthetic data with localized dependence where Seq-C-ITs are superior. In Appendix E.2, we also provide the results for the average *stopping times* of our tests: we empirically confirm that our tests are adaptive to the complexity of a problem at hand: they stop earlier on easy tasks and later on harder ones.

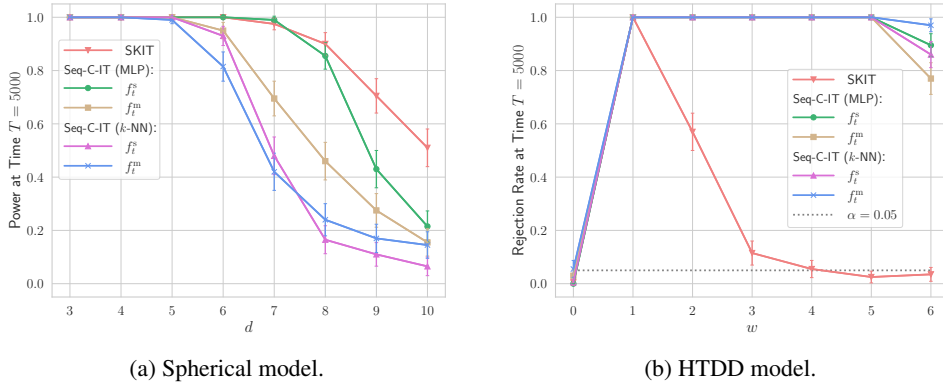

Figure 3: Power of different sequential independence tests on synthetic data from Section 3. Under the spherical model (no localized dependence), SKIT is better than Seq-C-ITs. Under the (structured) HTDD model, SKIT is inferior to sequential predictive independence tests.

**Real Data Experiment.** We compare two independence tests on MNIST image dataset [LeCun et al., 1998]. To simulate the null setting, we sample pairs of random images from the entire dataset, and to simulate the alternative, we sample pairs of random images depicting the same digit (Figure 4a). For Seq-C-IT, we use MLP with the same architecture as for simulations on synthetic data. For SKIT, we use the median heuristic with 20 points from  $P_{XY}$  to compute kernel hyperparameters. In Figure 4b, we show that while both tests control the type I error under  $H_0$ , SKIT is inferior to Seq-C-IT under  $H_1$ , requiring twice as much data to achieve perfect power.



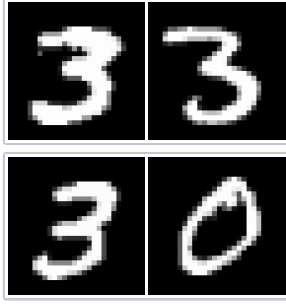

(a)

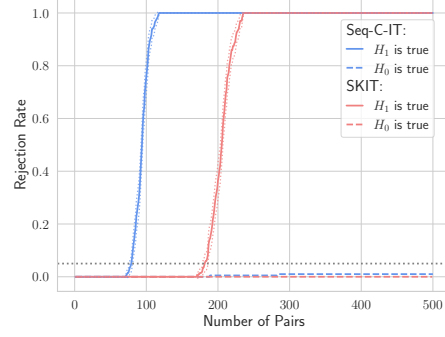

(b)

Figure 4: (a) Instances from the  $P_{XY}$  (top row) and  $P_X \times P_Y$  (bottom row) for MNIST dataset. (b) While both independence tests control the type I error under  $H_0$ , Seq-C-IT outperforms SKIT under  $H_1$ , rejecting the null much sooner. The results are aggregated over 200 runs.

## 4 Conclusion

While kernel methods are state-of-the-art for nonparametric two-sample and independence testing, their performance often deteriorates on complex data, e.g., high-dimensional data with localized dependence. In such settings, prediction-based tests are often much more effective. In this work, we developed sequential predictive two-sample and independence tests following the principle of testing by betting. Our tests control the type I error despite continuously monitoring the data and are consistent under weak and tractable assumptions. Further, our tests provably adapt to the complexity of a problem at hand: they stop earlier on easy tasks and later on harder ones. An additional advantage of our tests is that an analyst may modify the design choices, e.g., model architecture, on-the-fly. Through experiments on synthetic and real data, we confirm that our tests are competitive to kernel-based ones overall and outperform those under structured settings.

We refer the reader to the Appendix for additional results that were not included in the main paper:

1. In Appendix A, we complement classification-based ITs with a regression-based approach. Regression-based ITs represent an alternative to the classification-based approach in settings where a data stream  $((X_t, Y_t))_{t \geq 1}$  may be processed directly as feature-response pairs.
2. In Section 2, we considered the case of balanced classes, meaning that at each round, an instance from either  $P$  or  $Q$  is observed with equal chance. In Appendix B, we extend the methodology to a more general case of two-sample testing with unknown class proportions.
3. Batch two-sample and independence tests rely on either a cutoff computed using the asymptotic null distribution of a chosen test statistic (when it is tractable) or a permutation p-value, and if the distribution drifts, both approaches fail to provide the type I error control. In contrast, Seq-C-2ST and Seq-C-IT remain valid beyond the i.i.d. setting by construction (analogous to tests developed by Shekhar and Ramdas [2021], Podkopaev et al. [2023]), and we refer the reader to Appendix C for more details.

## References

- Thomas B. Berrett and Richard J. Samworth. Nonparametric independence testing via mutual information. *Biometrika*, 2019.
- Xiuyuan Cheng and Alexander Cloninger. Classification logit two-sample testing by neural networks for differentiating near manifold densities. *IEEE Transactions on Information Theory*, 2022.
- Ashok Cutkosky and Francesco Orabona. Black-box reductions for parameter-free online learning in banach spaces. In *Conference on Learning Theory*, 2018.
- Donald A. Darling and Herbert E. Robbins. Some nonparametric sequential tests with power one. *Proceedings of the National Academy of Sciences*, 1968.

295 Jerome H. Friedman. On multivariate goodness-of-fit and two-sample testing. Technical report,  
296 Stanford University, 2004.

297 Arthur Gretton, Olivier Bousquet, Alex Smola, and Bernhard Schölkopf. Measuring statistical  
298 dependence with Hilbert-Schmidt norms. In *Algorithmic Learning Theory*, 2005.

299 Arthur Gretton, Karsten M. Borgwardt, Malte J. Rasch, Bernhard Schölkopf, and Alexander Smola.  
300 A kernel two-sample test. *Journal of Machine Learning Research*, 2012.

301 Peter Grünwald, Alexander Henzi, and Tyron Lardy. Anytime-valid tests of conditional independence  
302 under model-X. *Journal of the American Statistical Association*, 2023.

303 Elad Hazan, Amit Agarwal, and Satyen Kale. Logarithmic regret algorithms for online convex  
304 optimization. *Machine Learning*, 2007.

305 Simon Hediger, Loris Michel, and Jeffrey Näf. On the use of random forest for two-sample testing.  
306 *Computational Statistics & Data Analysis*, 2022.

307 Wittawat Jitkrittum, Zoltán Szabó, Kacper P Chwialkowski, and Arthur Gretton. Interpretable  
308 distribution features with maximum testing power. In *Advances in Neural Information Processing*  
309 *Systems*, 2016.

310 Ilmun Kim and Aaditya Ramdas. Dimension-agnostic inference using cross U-statistics. *Bernoulli*,  
311 2020.

312 Ilmun Kim, Ann B. Lee, and Jing Lei. Global and local two-sample tests via regression. *Electronic*  
313 *Journal of Statistics*, 2019.

314 Ilmun Kim, Aaditya Ramdas, Aarti Singh, and Larry Wasserman. Classification accuracy as a proxy  
315 for two-sample testing. *The Annals of Statistics*, 2021.

316 Jonas M. Kübler, Vincent Stimper, Simon Buchholz, Krikamol Muandet, and Bernhard Schölkopf.  
317 AutoML two-sample test. In *Advances in Neural Information Processing Systems*, 2022.

318 Yann LeCun, Léon Bottou, Yoshua Bengio, and Patrick Haffner. Gradient-based learning applied to  
319 document recognition. *Proceedings of the IEEE*, 1998.

320 Alix Lhéritier and Frédéric Cazals. A sequential non-parametric multivariate two-sample test. *IEEE*  
321 *Transactions on Information Theory*, 2018.

322 Alix Lhéritier and Frédéric Cazals. Low-complexity nonparametric bayesian online prediction with  
323 universal guarantees. In *Advances in Neural Information Processing Systems*, 2019.

324 Feng Liu, Wenkai Xu, Jie Lu, Guangquan Zhang, Arthur Gretton, and Danica J. Sutherland. Learning  
325 deep kernels for non-parametric two-sample tests. In *International Conference on Machine*  
326 *Learning*, 2020.

327 David Lopez-Paz and Maxime Oquab. Revisiting classifier two-sample tests. In *International*  
328 *Conference on Learning Representations*, 2017.

329 Daniel Lundqvist, Anders Flykt, and Arne Öhman. The karolinska directed emotional faces - KDEF.  
330 Technical report, Karolinska Institutet, 1998.

331 Teodora Pandevara, Tim Bakker, Christian A Naesseth, and Patrick Forré. E-evaluating classifier  
332 two-sample tests. *arXiv preprint: 2210.13027*, 2022.

333 Aleksandr Podkopaev, Patrick Blöbaum, Shiva Prasad Kasiviswanathan, and Aaditya Ramdas. Se-  
334 quential kernelized independence testing. In *International Conference on Machine Learning*,  
335 2023.

336 Aaditya Ramdas and Tudor Manole. Randomized and exchangeable improvements of Markov’s,  
337 Chebyshev’s and Chernoff’s inequalities. *arXiv preprint: 2304.02611*, 2023.

338 Aaditya Ramdas, Sashank Jakkam Reddi, Barnabas Poczos, Aarti Singh, and Larry Wasserman.  
339 On the decreasing power of kernel and distance based nonparametric hypothesis tests in high  
340 dimensions. *AAAI Conference on Artificial Intelligence*, 2015.

- 341 Aaditya Ramdas, Johannes Ruf, Martin Larsson, and Wouter Koolen. Admissible anytime-valid  
342 sequential inference must rely on nonnegative martingales. *arXiv preprint: 2009.03167*, 2020.
- 343 Shalev Shaer, Gal Maman, and Yaniv Romano. Model-free sequential testing for conditional  
344 independence via testing by betting. In *Conference on Artificial Intelligence and Statistics*, 2023.
- 345 Glenn Shafer. Testing by betting: a strategy for statistical and scientific communication. *Journal of*  
346 *the Royal Statistical Society: Series A (Statistics in Society)*, 2021.
- 347 Glenn Shafer and Vladimir Vovk. *Game-Theoretic Foundations for Probability and Finance*. Wiley  
348 Series in Probability and Statistics. Wiley, 2019.
- 349 Shubhanshu Shekhar and Aaditya Ramdas. Nonparametric two-sample testing by betting. *arXiv*  
350 *preprint: 2112.09162*, 2021.
- 351 Danica J. Sutherland, Hsiao-Yu Tung, Heiko Strathmann, Soumyajit De, Aaditya Ramdas, Alex  
352 Smola, and Arthur Gretton. Generative models and model criticism via optimized maximum mean  
353 discrepancy. In *International Conference on Learning Representations*, 2017.
- 354 Jean Ville. *Étude critique de la notion de collectif*. Thèses de l’entre-deux-guerres. Gauthier-Villars,  
355 1939.
- 356 Larry Wasserman, Aaditya Ramdas, and Sivaraman Balakrishnan. Universal inference. *Proceedings*  
357 *of the National Academy of Sciences*, 2020.

## Appendix

### A Regression-based Independence Testing

Regression-based independence tests represent an alternative to classification-based approaches in settings where a data stream  $((X_t, Y_t))_{t \geq 1}$  may be processed directly as feature-response pairs. Suppose that one selects a functional class  $\mathcal{G} : \mathcal{X} \rightarrow \mathcal{Y}$  for performing such prediction task, and let  $\ell$  denote a loss function that evaluates the quality of predictions. For example, if  $(Y_t)_{t \geq 1}$  is a sequence of univariate random variables, one can use the squared loss:  $\ell(g(x), y) = (g(x) - y)^2$ , or the absolute loss:  $\ell(g(x), y) = |g(x) - y|$ .

Such tests rely on the following idea: if the alternative  $H_1$  in (2b) is true and a sequence of sequentially updated predictors  $(g_t)_{t \geq 1}$  has nontrivial predictive power, then the losses on random instances drawn from the joint distribution  $P_{XY}$  are expected to be less on average than the losses on random instances from  $P_X \times P_Y$ . For the  $t$ -th pair of points from  $P_{XY}$ , we can label the losses of  $g_t$  on all possible  $(X, Y)$ -pairs as

$$\begin{aligned} L_{2t-1} &= \ell(g_t(\mathbf{X}_{2t-1}, \mathbf{Y}_{2t-1})), & L_{2t} &= \ell(g_t(\mathbf{X}_{2t}, \mathbf{Y}_{2t})), \\ L'_{2t-1} &= \ell(g_t(\mathbf{X}_{2t-1}, \mathbf{Y}_{2t})), & L'_{2t} &= \ell(g_t(\mathbf{X}_{2t}, \mathbf{Y}_{2t-1})). \end{aligned} \quad (25)$$

One can view this problem as sequential two-sample testing under distribution drift (due to incremental learning of  $(g_t)_{t \geq 1}$ ). Hence, one may use either Seq-C-2ST from Section 2 or sequential kernelized 2ST of Shekhar and Ramdas [2021] on the resulting sequence of the losses on observations from  $P_{XY}$  and  $P_X \times P_Y$ . In what follows, we analyze a direct approach where testing is performed by comparing the losses on instances drawn from the two distributions. A critical difference with a construction of Seq-C-2ST is that to design a valid betting strategy one has to ensure that the payoff functions are lower bounded by negative one.

#### A.1 Proxy Regression-based Independence Test

To avoid cases when some expected values are not well-defined, we assume for simplicity that  $\mathcal{X}$  is a bounded subset of  $\mathbb{R}^d$  for some  $d \geq 1$ :  $\mathcal{X} = \{x \in \mathbb{R}^d : \|x\|_2 \leq B_1\}$  for some  $B_1 > 0$ . Similarly, we assume that  $\mathcal{Y}$  is a bounded subset of  $\mathbb{R}$ :  $\mathcal{Y} = \{y \in \mathbb{R} : |y| \leq B_2\}$  for some  $B_2 > 0$ . We note that the construction of the regression-based IT will not require explicit knowledge of constants  $B_1$  and  $B_2$ . First, we consider a setting where an instance either from the joint distribution or an instance from the product of the marginal distributions is observed at each round.

**Definition 3** (Proxy Setting). Suppose that we observe a stream of i.i.d. observations  $((X_t, Y_t, W_t))_{t \geq 1}$ , where  $W_t \sim \text{Rademacher}(1/2)$ , the distribution of  $(X_t, Y_t) \mid W_t = +1$  is  $P_X \times P_Y$ , and that of  $(X_t, Y_t) \mid W_t = -1$  is  $P_{XY}$ . The goal is to design a test for the following pair of hypotheses:

$$H_0 : P_{XY} = P_X \times P_Y, \quad (26a)$$

$$H_1 : P_{XY} \neq P_X \times P_Y. \quad (26b)$$

**Oracle Proxy Sequential Regression-based IT.** To construct an oracle test, we assume having access to the oracle predictor  $g_* : \mathcal{X} \rightarrow \mathcal{Y}$ , e.g., the minimizer of the squared risk is  $g_*(x) = \mathbb{E}[Y \mid X = x]$ . Formalizing the above intuition, we use  $\mathbb{E}[W\ell(g_*(X), Y)]$  as a natural way for measuring dependence between  $X$  and  $Y$ . To enforce boundedness of the payoff functions, we use ideas of the tests for symmetry from [Ramdas et al., 2020, Shekhar and Ramdas, 2021, Podkopaev et al., 2023, Shaer et al., 2023], namely we use a composition with an odd function:

$$f_*^r(X_t, Y_t, W_t) = \tanh(s_* \cdot W_t \cdot \ell(g_*(X_t), Y_t)) \in [-1, 1], \quad (27)$$

where  $s_* > 0$  is an appropriately selected scaling factor<sup>3</sup>. Since under  $H_0$  in (26a),  $s_* \cdot W_t \cdot \ell(g_*(X_t), Y_t)$  is a random variable that is symmetric around zero, it follows that  $\mathbb{E}[f_*^r(X_t, Y_t, W_t)] =$

<sup>3</sup>We note that rescaling is important for arguing about consistency and not the type I error control.

0, and, using the argument analogous to the proof of Theorem 1, we can easily deduce that a sequential IT based on  $f_\star^r$  controls the type I error control. The scaling factor  $s_\star$  is selected in a way that guarantees that, if  $H_1$  in (26b) is true and if  $\mathbb{E}[W\ell(g_\star(X), Y)] > 0$ , then  $\mathbb{E}[f_\star^r(X, Y, W)] > 0$ , which is a sufficient condition for consistency of the oracle test. In particular, we show that it suffices to consider:

$$s_\star = \sqrt{\frac{2\mu_\star}{\nu_\star}}, \quad (28a)$$

$$\text{where } \mu_\star = \mathbb{E}[W\ell(g_\star(X), Y)], \quad (28b)$$

$$\nu_\star = \mathbb{E}\left[(1 + W)(\ell(g_\star(X), Y))^3\right]. \quad (28c)$$

Without loss of generality, we assume that  $\nu_\star$  is bounded away from zero (which is a very mild assumption since  $\nu_\star$  essentially corresponds to a cubic risk of  $g_\star$  on data drawn from the product of the marginal distributions  $P_X \times P_Y$ ). Let the *oracle* regression-based wealth process  $(\mathcal{K}_t^{r,\star})_{t \geq 0}$  be defined by using the payoff function (27) with a scaling factor defined in (28a), along with a predictable sequence of betting fractions  $(\lambda_t)_{t \geq 1}$  selected via the ONS strategy (Algorithm 1). We have the following result about the oracle regression-based IT, whose proof is deferred to Appendix D.4.

**Theorem 3.** *The following claims hold for the oracle sequential regression-based IT based on  $(\mathcal{K}_t^{r,\star})_{t \geq 0}$ :*

1. Suppose that  $H_0$  in (26a) is true. Then the test ever stops with probability at most  $\alpha$ :  $\mathbb{P}_{H_1}(\tau < \infty) \leq \alpha$ .
2. Suppose that  $H_1$  in (26b) is true. Further, suppose that:  $\mathbb{E}[W\ell(g_\star(X), Y)] > 0$ . Then the test is consistent:  $\mathbb{P}_{H_1}(\tau < \infty) = 1$ .

**Practical Proxy Sequential Regression-based IT.** To construct a practical test, we use a sequence of predictors  $(g_t)_{t \geq 1}$  that are updated sequentially as more data are observed. We write  $\mathcal{A}_r : (\cup_{t \geq 1} (\mathcal{X} \times \mathcal{Y})^t) \times \mathcal{G} \rightarrow \mathcal{G}$  to denote a chosen regressor learning algorithm which maps a training dataset of any size and previously used predictor, to an updated predictor. We start with  $\mathcal{D}_0 = \emptyset$  and some initial guess  $g_1 \in \mathcal{G}$ . At round  $t$ , we use the payoff function:

$$f_t^r(X_t, Y_t, W_t) = \tanh(s_t \cdot W_t \cdot \ell(g_t(X_t), Y_t)). \quad (29)$$

where a sequence of predictable scaling factors  $(s_t)_{t \geq 1}$  is defined as follows: we set  $s_0 = 0$  and define:

$$s_t = \sqrt{\frac{2\mu_t}{\nu_t}}, \quad (30a)$$

$$\text{where } \mu_t = \left( \frac{1}{t-1} \sum_{i=1}^{t-1} W_i \cdot \ell(g_i(X_i), Y_i) \right) \vee 0, \quad (30b)$$

$$\nu_t = \frac{1}{t-1} \sum_{i=1}^{t-1} (1 + W_i) \cdot (\ell(g_i(X_i), Y_i))^3. \quad (30c)$$

After  $(X_t, Y_t, W_t)$  has been used for betting, we update a training dataset:  $\mathcal{D}_t = \mathcal{D}_{t-1} \cup \{(X_t, Y_t, W_t)\}$ , and an existing predictor:  $g_{t+1} = \mathcal{A}_r(\mathcal{D}_t, g_t)$ . We summarize this practical sequential 2ST in Algorithm 3.

For simplicity, we consider a class of functions  $\mathcal{G} := \{g_\theta : \mathcal{X} \rightarrow \mathcal{Y}, \theta \in \Theta\}$  for some parameter set  $\Theta$  which we assume to be a subset of a metric space. In this case, a sequence of predictors  $(g_t)_{t \geq 1}$  is associated with the corresponding sequence of parameters  $(\theta_t)_{t \geq 1}$ : for  $t \geq 1$ ,  $g_t(\cdot) = g(\cdot; \theta_t)$  for some  $\theta_t \in \Theta$ . To argue about the consistency of the resulting test, we make two assumptions.

**Assumption 3 (Smoothness).** We assume that:

- Predictors in  $\mathcal{G}$  are  $L_1$ -Lipschitz smooth:

$$\sup_{x \in \mathcal{X}} |g(x; \theta) - g(x; \theta')| \leq L_1 \|\theta - \theta'\|, \quad \forall \theta, \theta' \in \Theta. \quad (31)$$

---

**Algorithm 3** Proxy Sequential Regression-based IT

---

**Input:** significance level  $\alpha \in (0, 1)$ , data stream  $((X_t, Y_t, W_t))_{t \geq 1}$ ,  $g_1(z) \equiv 0$ ,  $\mathcal{A}_r$ ,  $\mathcal{D}_0 = \emptyset$ ,  $\lambda_1^{\text{ONS}} = 0$ ,  $s_1 = 0$ .  
**for**  $t = 1, 2, \dots$  **do**  
    Evaluate the payoff  $f_t^r(X_t, Y_t, W_t)$  as in (29);  
    Using  $\lambda_t^{\text{ONS}}$ , update the wealth process  $\mathcal{K}_t^r$  as in (5);  
    **if**  $\mathcal{K}_t^r \geq 1/\alpha$  **then**  
        Reject  $H_0$  and stop;  
    **else**  
        Update the training dataset:  $\mathcal{D}_t := \mathcal{D}_{t-1} \cup \{(X_t, Y_t)\}$ ;  
        Update predictor:  $g_{t+1} = \mathcal{A}_r(\mathcal{D}_t, g_t)$ ;  
        Compute  $s_{t+1}$  as in (30a);  
        Compute  $\lambda_{t+1}^{\text{ONS}}$  (Algorithm 1) using  $f_t^r(X_t, Y_t, W_t)$ ;

---

- 432 • The loss function  $\ell$  is  $L_2$ -Lipschitz smooth:

$$\sup_{\substack{x \in \mathcal{X} \\ y \in \mathcal{Y}}} |\ell(g(x; \theta), y) - \ell(g(x; \theta'), y)| \leq L_2 \sup_{x \in \mathcal{X}} |g(x; \theta) - g(x; \theta')|, \quad \forall \theta, \theta' \in \Theta. \quad (32)$$

433 In words, Assumption (31) states that the outputs of predictors, whose parameters are close, will  
434 also be close. Assumption (32) states that the losses of two predictors, whose outputs are close,  
435 will also be close. For example, if  $\mathcal{G}$  is a class of linear predictors:  $g_\theta(x) = \theta^\top x$ ,  $x \in \mathcal{X}$ , then  
436 Assumption 3 will be trivially satisfied for the squared and the absolute losses if  $\mathcal{X}$  and  $\mathcal{Y}$  are bounded.  
437 Note that we do not need an explicit knowledge of  $L_1$  or  $L_2$  for designing a test. Second, we make a  
438 *learnability* assumption about algorithm  $\mathcal{A}_r$ .

439 **Assumption 4** (Learnability). Suppose that  $H_1$  in (26b) is true. We assume that the regressor  
440 learning algorithm  $\mathcal{A}_r$  is such that for the resulting sequence of parameters  $(\theta_t)_{t \geq 1}$ , it holds that  
441  $\theta_t \xrightarrow{\text{a.s.}} \theta_*$ , where  $\theta_*$  is a random variable taking values in  $\Theta$  and  $\mathbb{E}[W\ell(g(X; \theta_*), Y) \mid \theta_*] \stackrel{\text{a.s.}}{>} 0$ ,  
442 where  $(X, Y, W) \perp\!\!\!\perp \theta_*$ .

443 We conclude with the following result for the practical proxy sequential regression-based IT, whose  
444 proof is deferred to Appendix D.4.

445 **Theorem 4.** *The following claims hold for the proxy sequential regression-based IT (Algorithm 3):*

- 446 1. Suppose that  $H_0$  in (26a) is true. Then the test ever stops with probability at most  $\alpha$ :  
447  $\mathbb{P}_{H_0}(\tau < \infty) \leq \alpha$ .  
448 2. Suppose that  $H_1$  in (26b) is true. Further, suppose that Assumptions 3 and 4 are satisfied.  
449 Then the test is consistent:  $\mathbb{P}_{H_1}(\tau < \infty) = 1$ .

450 **Sequential Regression-based Independence Test (Seq-R-IT).** Next, we instantiate this test  
451 for the sequential independence testing setting (as per Definition 2) where we observe sequence  
452  $((X_t, Y_t))_{t \geq 1}$ , where  $(X_t, Y_t) \stackrel{\text{iid}}{\sim} P_{XY}$ ,  $t \geq 1$ . Analogous to Section 3, we bet on the outcome of  
453 two observations drawn from the joint distribution  $P_{XY}$ . To proceed, we derandomize the payoff  
454 function (29) and consider

$$\begin{aligned} f_t^r((X_{2t-1}, Y_{2t-1}), (X_{2t}, Y_{2t})) &= \frac{1}{4} (\tanh(s_t \cdot \ell(g_t(X_{2t-1}), Y_{2t})) + \tanh(s_t \cdot \ell(g_t(X_{2t}), Y_{2t-1}))) \\ &\quad - \frac{1}{4} (\tanh(s_t \cdot \ell(g_t(X_{2t}), Y_{2t})) - \tanh(s_t \cdot \ell(g_t(X_{2t-1}), Y_{2t-1}))). \end{aligned} \quad (33)$$

455 After betting on the outcome of the  $t$ -th pair of observations from  $P_{XY}$ , we update a training dataset:

$$\mathcal{D}_t = \mathcal{D}_{t-1} \cup \{(X_{2t-1}, Y_{2t-1}), (X_{2t}, Y_{2t})\},$$

456 and a predictive model:  $\hat{g}_{t+1} = \mathcal{A}_r(\mathcal{D}_t, \hat{g}_t)$ .

## 457 A.2 Synthetic Experiments

458 To evaluate the performance of Seq-R-IT, we consider the *Gaussian linear model*. Let  $(X_t)_{t \geq 1}$  and  
 459  $(\varepsilon_t)_{t \geq 1}$  denote two independent sequences of i.i.d. standard Gaussian random variables. For  $t \geq 1$ ,  
 460 we take

$$(X_t, Y_t) = (X_t, X_t\beta + \varepsilon_t),$$

461 where  $\beta \neq 0$  implies nonzero linear correlation (hence dependence). We consider 20 values of  $\beta$   
 462 equally spaced in  $[0, 1/2]$ . For the comparison, we use:

- 463 1. *Seq-R-IT with ridge regression*. We use ridge regression as an underlying model:  $\hat{g}_t(x) =$   
 464  $\beta_0^{(t)} + x\beta_1^{(t)}$ , where

$$(\beta_0^{(t)}, \beta_1^{(t)}) = \arg \min_{\beta_0, \beta_1} \sum_{i=1}^{2(t-1)} (Y_i - X_i\beta_1 - \beta_0)^2 + \lambda\beta_1^2.$$

- 465 2. *Seq-C-IT with QDA*. Note that  $P_{XY} = \mathcal{N}(\mu, \Sigma^+)$  and  $P_X \times P_Y = \mathcal{N}(\mu, \Sigma^-)$ , where

$$\mu = \begin{pmatrix} 0 \\ 0 \end{pmatrix}, \quad \Sigma^+ = \begin{pmatrix} 1 & \beta \\ \beta & 1 + \beta^2 \end{pmatrix}, \quad \Sigma^- = \begin{pmatrix} 1 & 0 \\ 0 & 1 + \beta^2 \end{pmatrix}.$$

466 For this problem, an oracle predictor which minimizes the misclassification risk is

$$g^*(x, y) = \frac{\varphi((x, y); \mu^+, \Sigma^+) - \varphi((x, y); \mu^-, \Sigma^-)}{\varphi((x, y); \mu^-, \Sigma^-) + \varphi((x, y); \mu^+, \Sigma^+)} \in [-1, 1], \quad (34)$$

467 where  $\varphi((x, y); \mu, \Sigma)$  denotes the density of the Gaussian distribution  $\mathcal{N}(\mu, \Sigma)$  evaluated at  
 468  $(x, y)$ . Recall that  $\mathcal{D}_{t-1} = \{(Z_i, +1)\}_{i \leq 2(t-1)} \cup \{(Z'_i, -1)\}_{i \leq 2(t-1)}$  denotes the training  
 469 dataset that is available at round  $t$  for training a predictor  $\hat{g}_t : \mathcal{X} \times \mathcal{Y} \rightarrow [-1, 1]$ . We  
 470 deploy Seq-C-IT with an estimator  $\hat{g}_t$  of (34), obtained by using plug-in estimates of  
 471  $\mu^+, \Sigma^+, \mu^-, \Sigma^-$ , computed from  $\mathcal{D}_{t-1}$ :

$$\hat{\mu}_t^+ = \frac{1}{2(t-1)} \sum_{Z \in \mathcal{D}_{t-1}^+} Z, \quad \hat{\Sigma}_t^+ = \left( \frac{1}{2(t-1)} \sum_{Z \in \mathcal{D}_{t-1}^+} ZZ^\top \right) - (\hat{\mu}_t^+)(\hat{\mu}_t^+)^\top,$$

472 and  $\hat{\mu}_t^-, \hat{\Sigma}_t^-$  are computed similarly from  $\mathcal{D}_{t-1}^-$ .

473 In addition, we also include HSIC-based SKIT to the comparison and defer the details regarding  
 474 kernel hyperparameters to Appendix E.1. We set the monitoring horizon to  $T = 5000$  points from  
 475  $P_{XY}$  and aggregate the results over 200 sequences of observations for each value of  $\beta$ . We illustrate  
 476 the result in Figure 5: while Seq-R-IT has high power for large values of  $\beta$ , we observe its inferior  
 477 performance against Seq-C-IT (and SKIT) under the harder settings. Improving regression-based  
 478 betting strategies, e.g., designing better scaling factors that still yield a provably consistent test, is an  
 479 open question for future research.

## 480 B Two-sample Testing with Unbalanced Classes

481 In Section 2, we developed a sequential 2ST under the assumption at each round, an instance from  
 482 either  $P$  or  $Q$  is revealed with equal probability. Such assumption was reasonable for designing  
 483 Seq-C-IT, where external randomization produced two instances from  $P_{XY}$  and  $P_X \times P_Y$  at each  
 484 round. Next, we generalize our sequential 2ST to a more general setting of unbalanced classes.

485 **Definition 4** (Sequential two-sample testing with unbalanced classes). Let  $\pi \in (0, 1)$ . Suppose  
 486 that we observe a stream of i.i.d. observations  $((Z_t, W_t))_{t \geq 1}$ , where  $W_t \sim \text{Rademacher}(\pi)$ , the  
 487 distribution of  $Z_t \mid W_t = +1$  is denoted  $P$ , and that of  $Z_t \mid W_t = -1$  is denoted  $Q$ . We set the goal  
 488 of designing a sequential test for the following pair of hypotheses:

$$H_0 : P = Q, \quad (35a)$$

$$H_1 : P \neq Q. \quad (35b)$$

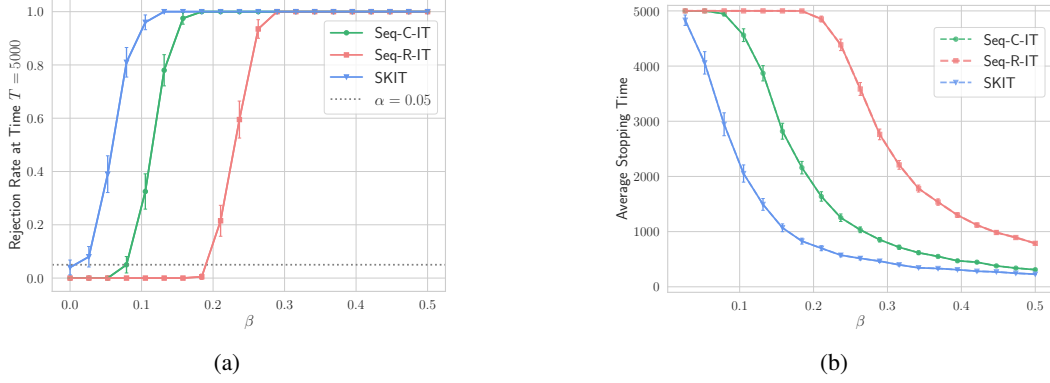

Figure 5: Comparison between Seq-R-IT, Seq-C-IT and HSIC-based SKIT under the Gaussian linear model. Inspecting Figure 5a at  $\beta = 0$  confirms that all tests control the type I error. Non-surprisingly, kernel-based SKIT performs better than predictive tests under this model (no localized dependence). We also observe that Seq-C-IT performs better than Seq-R-IT.

For what follows, we will focus on the payoff based on the squared risk due to its relationship to the likelihood-ratio-based test (Remark 3). In particular, after correcting the likelihood under the null in (20) to account for a general positive class proportion  $\pi$ , we can deduce that (see Appendix D.5):

$$(1 - \lambda_t) \cdot 1 + \lambda_t \cdot \frac{(\eta_t(Z_t))^{\mathbb{1}\{W_t=1\}} (1 - \eta_t(Z_t))^{\mathbb{1}\{W_t=0\}}}{(\pi)^{\mathbb{1}\{W_t=1\}} (1 - \pi)^{\mathbb{1}\{W_t=0\}}} = 1 + \lambda_t \cdot \frac{W_t (g_t(Z_t) - (2\pi - 1))}{1 + W_t(2\pi - 1)}, \quad (36)$$

where  $\eta_t(z) = (g_t(z) + 1)/2$ , and hence, a natural payoff function for the case with unbalanced classes is

$$f_t^u(Z_t, W_t) = \frac{W_t (g_t(Z_t) - (2\pi - 1))}{1 + W_t(2\pi - 1)}. \quad (37)$$

Note that the payoff for the balanced case (22b) is recovered by setting  $\pi = 1/2$ . It is easy to check that (see Appendix D.5): (a)  $f_t^u(z, w) \geq -1$  for any  $(z, w) \in \mathcal{Z} \times \{-1, 1\}$ , and (b) if  $H_0$  in (35a) is true, then  $\mathbb{E}_{H_0} [f_t^u(Z_t, W_t) | \mathcal{F}_{t-1}] = 0$ , where  $\mathcal{F}_{t-1} = \sigma(\{(Z_i, W_i)\}_{i \leq t-1})$ . This in turn implies that a wealth process that relies on the payoff function  $f_t^u$  in (37) is a nonnegative martingale, and hence, the corresponding sequential 2ST is valid. However, the positive class proportion  $\pi$ , needed to use the payoff function (37), is generally unknown beforehand. First, let us consider the case when  $\lambda_t = 1$ ,  $t \geq 1$ . In this case, the wealth of a gambler that uses the payoff function (37) after round  $t$  is

$$\mathcal{K}_t = \frac{\prod_{i=1}^t (\eta_i(Z_i))^{\mathbb{1}\{W_i=1\}} (1 - \eta_i(Z_i))^{\mathbb{1}\{W_i=0\}}}{\prod_{i=1}^t \pi^{\mathbb{1}\{W_i=1\}} (1 - \pi)^{\mathbb{1}\{W_i=0\}}}. \quad (38)$$

Note that:

$$\hat{\pi}_t := \frac{1}{t} \sum_{i=1}^t \mathbb{1}\{W_i = 1\} = \arg \max_{\pi \in [0,1]} \left( \prod_{i=1}^t \pi^{\mathbb{1}\{W_i=1\}} (1 - \pi)^{\mathbb{1}\{W_i=0\}} \right),$$

is the MLE for  $\pi$  computed from  $\{W_i\}_{i \leq t}$ . In particular, if we consider a process  $(\tilde{\mathcal{K}}_t)_{t \geq 0}$ , where

$$\tilde{\mathcal{K}}_t := \frac{\prod_{i=1}^t (\eta_i(Z_i))^{\mathbb{1}\{W_i=1\}} (1 - \eta_i(Z_i))^{\mathbb{1}\{W_i=0\}}}{\prod_{i=1}^t (\hat{\pi}_t)^{\mathbb{1}\{W_i=1\}} (1 - \hat{\pi}_t)^{\mathbb{1}\{W_i=0\}}}, \quad t \geq 1,$$

it follows that  $\tilde{\mathcal{K}}_t \leq \mathcal{K}_t$ ,  $\forall t \geq 1$ , meaning that  $(\tilde{\mathcal{K}}_t)_{t \geq 0}$  is a process that is upper bounded by a nonnegative martingale with initial value one. This in turn implies that a test based on  $(\tilde{\mathcal{K}}_t)_{t \geq 0}$  is a valid level- $\alpha$  sequential 2ST for the case of unknown class proportions. This idea underlies the running MLE sequential likelihood ratio test of Wasserman et al. [2020] and has been recently considered in the context of two-sample testing by Pandeva et al. [2022]. In case of nontrivial betting fractions:  $(\lambda_t)_{t \geq 1}$ , representation of the wealth process (38) no longer holds, and to proceed, we modify the rules of the game and use minibatching. A bet is placed on every  $b$  (say, 5 or 10) observations, meaning



that for a given minibatch size  $b \geq 1$ , at round  $t$  we bet on  $\{(Z_{b(t-1)+i}, W_{b(t-1)+i})\}_{i \in \{1, \dots, b\}}$ . The MLE of  $\pi$  computed from the  $t$ -th minibatch is

$$\hat{\pi}_t = \frac{1}{b} \sum_{i=b(t-1)+1}^{bt} \mathbb{1}\{W_i = +1\}.$$

We consider a payoff function of the following form:

$$f_t^u \left( \{(Z_{b(t-1)+i}, W_{b(t-1)+i})\}_{i \in \{1, \dots, b\}} \right) = \prod_{i=b(t-1)+1}^{bt} \left( \frac{1 + W_i g_t(Z_i)}{1 + W_i (2\hat{\pi}_t - 1)} \right) - 1. \quad (39)$$

In words, the above payoff essentially compares the performance of a predictor  $g_t$ , trained on  $\{(Z_i, W_i)\}_{i \leq b(t-1)}$  and evaluated on the  $t$ -th minibatch, to that of a trivial baseline predictor to form a bet. In particular, setting  $b = 1$  yields a valid, yet a powerless test. Indeed, we have  $\hat{\pi}_t = \mathbb{1}\{W_t = 1\} = (W_t + 1)/2$ . In this case, the payoff (39) reduces to

$$\frac{W_t (g_t(Z_t) - (2\hat{\pi}_t - 1))}{1 + W_t (2\hat{\pi}_t - 1)} = \frac{W_t g_t(Z_t) - 1}{2} \stackrel{\text{a.s.}}{\in} [-1, 0],$$

implying that the wealth can not grow even if the null is false. Define a wealth processes  $(\mathcal{K}_t^u)_{t \geq 0}$  based on the payoff functions (39) along with a predictable sequence of betting fractions  $(\lambda_t)_{t \geq 1}$  selected via ONS strategy (Algorithm 1). Let  $\mathcal{F}_t = \sigma(\{(Z_i, W_i)\}_{i \leq bt})$  for  $t \geq 1$ , with  $\mathcal{F}_0$  denoting a trivial sigma-algebra. We conclude with the following result, whose proof is deferred to Appendix D.5.

**Theorem 5.** *Suppose that  $H_0$  in (35a) is true. Then  $(\mathcal{K}_t^u)_{t \geq 0}$  is a nonnegative supermartingale adapted to  $(\mathcal{F}_t)_{t \geq 0}$ . Hence, the sequential 2ST based on  $(\mathcal{K}_t^u)_{t \geq 0}$  satisfies:  $\mathbb{P}_{H_0}(\tau < \infty) \leq \alpha$ .*

## C Testing under Distribution Drift

First, we define the problem of two-sample testing when at each round instances from both distributions are observed.

**Definition 5** (Sequential two-sample testing). Suppose that we observe that a stream of observations:  $((X_t, Y_t))_{t \geq 1}$ , where  $(X_t, Y_t) \stackrel{\text{iid}}{\sim} P_X \times P_Y$  for  $t \geq 1$ . The goal is to design a sequential test for

$$H_0 : (X_t, Y_t) \stackrel{\text{iid}}{\sim} P_X \times P_Y \text{ and } P_X = P_Y, \quad (40a)$$

$$H_1 : (X_t, Y_t) \stackrel{\text{iid}}{\sim} P_X \times P_Y \text{ and } P_X \neq P_Y. \quad (40b)$$

Under the two-sample testing setting (Definition 5), we label observations from  $P_Y$  as positive (+1) and observations from  $P_X$  as negative (-1). We write  $\mathcal{A}_c^{2\text{ST}} : (\cup_{t \geq 1} (\mathcal{X} \times \{-1, +1\})^t) \times \mathcal{G} \rightarrow \mathcal{G}$  to denote a chosen learning algorithm which maps a training dataset of any size and previously used predictor, to an updated predictor. We start with  $\mathcal{D}_0 = \emptyset$  and  $g_1 : g_1(x) = 0, \forall x \in \mathcal{X}$ . At round  $t$ , we bet using derandomized versions of the payoffs (22), namely

$$f_t^m(X_t, Y_t) = \frac{1}{2} (\text{sign}[g_t(Y_t)] - \text{sign}[g_t(X_t)]), \quad (41a)$$

$$f_t^s(X_t, Y_t) = \frac{1}{2} (g_t(Y_t) - g_t(X_t)). \quad (41b)$$

After  $(X_t, Y_t)$  has been used for betting, we update a training dataset and an existing predictor:

$$\mathcal{D}_t = \mathcal{D}_{t-1} \cup \{(Y_t, +1), (X_t, -1)\}, \quad g_{t+1} = \mathcal{A}_c^{2\text{ST}}(\mathcal{D}_t, g_t).$$

**Testing under Distribution Drift.** Batch two-sample and independence tests generally rely on either a cutoff computed using the asymptotic null distribution of a chosen test statistic (if tractable) or a permutation p-value. Both approaches require imposing i.i.d. (or exchangeability, for the latter option) assumption about the data distribution, and if the distribution drifts, both approaches fail to guarantee the type I error control. In contrast, Seq-C-2ST and Seq-C-IT remain valid beyond the i.i.d. setting by construction (analogous to tests developed in [Shekhar and Ramdas, 2021, Podkopaev et al., 2023]). First, we define the problems of sequential two-sample and independence testing under distribution drift.

**Definition 6** (Sequential two-sample testing under distribution drift). Suppose that we observe that a stream of independent observations:  $((X_t, Y_t))_{t \geq 1}$ , where  $(X_t, Y_t) \sim P_X^{(t)} \times P_Y^{(t)}$ ,  $t \geq 1$ . The goal is to design a sequential test for the following pair of hypotheses:

$$H_0 : P_X^{(t)} = P_Y^{(t)}, \forall t, \quad (42a)$$

$$H_1 : \exists t' : P_X^{(t')} \neq P_Y^{(t')}. \quad (42b)$$

**Definition 7** (Sequential independence testing under distribution drift). Suppose that we observe that a stream of independent observations from the joint distribution which drifts over time:  $((X_t, Y_t))_{t \geq 1}$ , where  $(X_t, Y_t) \sim P_{XY}^{(t)}$ . The goal is to design a sequential test for the following pair of hypotheses:

$$H_0 : P_{XY}^{(t)} = P_X^{(t)} \times P_Y^{(t)}, \forall t, \quad (43a)$$

$$H_1 : \exists t' : P_{XY}^{(t')} \neq P_X^{(t')} \times P_Y^{(t')}. \quad (43b)$$

The superscripts highlight that, in contrast to the standard i.i.d. setting (Definitions 5 and 2), the underlying distributions may drift over time. For independence testing, we need to impose an additional assumption that enables reasoning about the type I error control of Seq-C-IT.

**Assumption 5.** Consider the setting of independence testing under distribution drift (Definition 7). We assume that for each  $t \geq 1$ , it holds that either  $P_X^{(t-1)} = P_X^{(t)}$  or  $P_Y^{(t-1)} = P_Y^{(t)}$ , meaning that at each step either the distribution of  $X$  changes or that of  $Y$  changes, but not both simultaneously<sup>4</sup>.

We have the following result about the type I error control of our tests under distribution drift.

**Corollary 2.** *The following claims hold:*

1. Suppose that  $H_0$  in (42a) is true. Then Seq-C-2ST satisfies:  $\mathbb{P}_{H_0}(\tau < \infty) \leq \alpha$ .
2. Suppose that  $H_0$  in (43a) is true. Further, suppose that Assumption 5 is satisfied. Then Seq-C-IT satisfies:  $\mathbb{P}_{H_0}(\tau < \infty) \leq \alpha$ .

The above result follows from the fact the payoff functions underlying Seq-C-2ST (41) and Seq-C-IT (23) are valid under the more general null hypotheses (42a) and (43a) respectively. The rest of the proof of Corollary 2 follows the same steps as that of Theorem 2, and we omit the details. We conclude with an example which shows that Assumption 5 is necessary for the type I error control.

**Example 2.** Consider the following case when the null  $H_0$  in (43a) is true, but Assumption 5 is not satisfied. We show that Seq-C-IT fails to control type I error (at any prespecified level  $\alpha \in (0, 1)$ ), and for simplicity, focus on the payoff function based on the squared risk (23). Suppose that we observe a sequence of observations:  $((X_t, Y_t))_{t \geq 1}$ , where  $(X_t, Y_t) = (t + W_t, t + V_t)$  and  $W_t, V_t \stackrel{\text{iid}}{\sim} \text{Bern}(1/2)$ . It suffices to show that there exists a sequence of predictors  $(g_t)_{t \geq 1}$ , for which

$$\liminf_{t \rightarrow \infty} \frac{1}{t} \sum_{i=1}^t f_i^s((X_{2t-1}, Y_{2t-1}), (X_{2t}, Y_{2t})) \stackrel{\text{a.s.}}{>} 0. \quad (44)$$

If (44) holds, then using the same argument as in the proof of Theorem 2, one can then deduce that  $\mathbb{P}(\tau < \infty) = 1$ . Consider the following sequence of predictors  $(g_t)_{t \geq 1}$ :

$$g_t(x, y) = ((x - (2t - \frac{1}{2}))(y - (2t - \frac{1}{2})) \wedge 1) \vee -1.$$

We have:

$$\begin{aligned} g_t(X_{2t}, Y_{2t}) &= ((W_{2t} + \frac{1}{2})(V_{2t} + \frac{1}{2}) \wedge 1) \vee -1, \\ g_t(X_{2t-1}, Y_{2t-1}) &= (W_{2t-1} - \frac{1}{2})(V_{2t-1} - \frac{1}{2}), \\ g_t(X_{2t}, Y_{2t-1}) &= (W_{2t} + \frac{1}{2})(V_{2t-1} - \frac{1}{2}), \\ g_t(X_{2t-1}, Y_{2t}) &= (W_{2t-1} - \frac{1}{2})(V_{2t} + \frac{1}{2}). \end{aligned}$$

Simple calculation shows that:

$\mathbb{E}[g_t(X_{2t}, Y_{2t})] = 11/16$ ,  $\mathbb{E}[g_t(X_{2t-1}, Y_{2t-1})] = \mathbb{E}[g_t(X_{2t}, Y_{2t-1})] = \mathbb{E}[g_t(X_{2t-1}, Y_{2t})] = 0$  and hence, for all  $t \geq 1$ , it holds that  $\mathbb{E}[f_t^s((X_{2t-1}, Y_{2t-1}), (X_{2t}, Y_{2t}))] = 11/64 > 0$ . This in turn implies (44), and hence, we conclude that Seq-C-IT fails to control the type I error.

<sup>4</sup>Technically, a slightly weaker condition suffices — at odd  $t$ , the distribution can change arbitrarily, but at even  $t$ , either the distribution of  $X$  changes or that of  $Y$  changes but not both; however, this weaker condition is slightly less intuitive than the stated condition.

## 574 D Proofs

### 575 D.1 Auxiliary Results

576 **Proposition 2** (Ville's inequality [Ville, 1939]). *Suppose that  $(\mathcal{M}_t)_{t \geq 0}$  is a nonnegative supermartingale process adapted to a filtration  $(\mathcal{F}_t)_{t \geq 0}$ . Then, for any  $a > 0$  it holds that:*

$$\mathbb{P}(\exists t \geq 1 : \mathcal{M}_t \geq a) \leq \frac{\mathbb{E}[\mathcal{M}_0]}{a}.$$

### 578 D.2 Supporting Lemmas

579 **Lemma 6.** *Consider sequential two-sample testing setting (Definition 1). Suppose that a predictor*  
580  *$g \in \mathcal{G}$  satisfies  $\mathbb{E}[f(Z, W)] > 0$ , where  $f(z, w) := wg(z)$ .*

581 (a) *Consider the wealth process  $(\mathcal{K}_t)_{t \geq 0}$  based on  $f$  along with the ONS strategy for selecting*  
582 *betting fractions (Algorithm 1). Then we have the following lower bound on the growth rate*  
583 *of the wealth process:*

$$\liminf_{t \rightarrow \infty} \frac{\log \mathcal{K}_t}{t} \stackrel{\text{a.s.}}{\geq} \frac{1}{4} \left( \frac{(\mathbb{E}[f(Z, W)])^2}{\mathbb{E}[f^2(Z, W)]} \wedge \mathbb{E}[f(Z, W)] \right). \quad (45)$$

584 (b) *For  $\lambda_\star = \arg \max_{\lambda \in [-0.5, 0.5]} \mathbb{E}[\log(1 + \lambda f(Z, W))]$ , it holds that:*

$$\mathbb{E}[\log(1 + \lambda_\star f(Z, W))] \leq \frac{4}{3} \cdot \frac{(\mathbb{E}[f(Z, W)])^2}{\mathbb{E}[(f(Z, W))^2]} \wedge \frac{\mathbb{E}[f(Z, W)]}{2}. \quad (46)$$

585 *Analogous result holds when the payoff function  $f(z, w) := w \cdot \text{sign}[g(z)]$  is used instead.*

586 *Proof.* (a) Under the ONS betting strategy, for any sequence of outcomes  $(f_t)_{t \geq 1}$ ,  $f_t \in [-1, 1]$ ,  
587 it holds that (see the proof of Theorem 1 in [Cutkosky and Orabona, 2018]):

$$\log \mathcal{K}_t(\lambda_0) - \log \mathcal{K}_t = O \left( \log \left( \sum_{i=1}^t f_i^2 \right) \right), \quad (47)$$

588 where  $\mathcal{K}_t(\lambda_0)$  is the wealth of any constant betting strategy  $\lambda_0 \in [-1/2, 1/2]$  and  $\mathcal{K}_t$  is the  
589 wealth corresponding to the ONS betting strategy. Hence, it follows that

$$\frac{\log \mathcal{K}_t}{t} \geq \frac{\log \mathcal{K}_t(\lambda_0)}{t} - C \cdot \frac{\log t}{t}, \quad (48)$$

590 for some absolute constant  $C > 0$ . Next, consider

$$\lambda_0 = \frac{1}{2} \left( \left( \frac{\sum_{i=1}^t f_i}{\sum_{i=1}^t f_i^2} \wedge 1 \right) \vee 0 \right).$$

591 We obtain:

$$\begin{aligned} \frac{\log \mathcal{K}_t(\lambda_0)}{t} &= \frac{1}{t} \sum_{i=1}^t \log(1 + \lambda_0 f_i) \\ &\stackrel{(a)}{\geq} \frac{1}{t} \sum_{i=1}^t (\lambda_0 f_i - \lambda_0^2 f_i^2) \\ &= \left( \frac{\frac{1}{t} \sum_{i=1}^t f_i}{4} \vee 0 \right) \cdot \left( \frac{\frac{1}{t} \sum_{i=1}^t f_i}{\frac{1}{t} \sum_{i=1}^t f_i^2} \wedge 1 \right), \end{aligned} \quad (49)$$

where in (a) we used that  $\log(1+x) \geq x - x^2$  for  $x \in [-1/2, 1/2]$ . From (48), it then follows that:

$$\begin{aligned} \liminf_{t \rightarrow \infty} \frac{\log \mathcal{K}_t}{t} &\stackrel{\text{a.s.}}{\geq} \left( \frac{\mathbb{E}[f(Z, W)]}{4} \vee 0 \right) \cdot \left( \frac{\mathbb{E}[f(Z, W)]}{\mathbb{E}[f^2(Z, W)]} \wedge 1 \right) \\ &= \frac{1}{4} \left( \frac{(\mathbb{E}[f(Z, W)])^2}{\mathbb{E}[f^2(Z, W)]} \wedge \mathbb{E}[f(Z, W)] \right), \end{aligned}$$

which completes the proof of the first assertion of the lemma.

(b) Since  $\log(1+x) \leq x - 3x^2/8$  for any  $x \in [-0.5, 0.5]$ , we know that:

$$\begin{aligned} \mathbb{E}[\log(1 + \lambda_* f(Z, W))] &\leq \mathbb{E} \left[ \lambda_* f(Z, W) - \frac{3}{8} (\lambda_* f(Z, W))^2 \right] \\ &\leq \max_{\lambda \in [-0.5, 0.5]} \left( \lambda \cdot \mathbb{E}[f(Z, W)] - \frac{3\lambda^2}{8} \cdot \mathbb{E}[(f(Z, W))^2] \right). \end{aligned}$$

The optimizer of the above is

$$\tilde{\lambda} = \frac{4\mathbb{E}[f(Z, W)]}{3\mathbb{E}[(f(Z, W))^2]} \wedge \frac{1}{2}.$$

Hence, as long as  $\mathbb{E}[f(Z, W)] \leq (3/8) \cdot \mathbb{E}[(f(Z, W))^2]$ , we have:

$$\mathbb{E}[\log(1 + \lambda_* f(Z, W))] \leq \frac{2}{3} \frac{(\mathbb{E}[f(Z, W)])^2}{\mathbb{E}[(f(Z, W))^2]}. \quad (50)$$

If however,  $\mathbb{E}[f(Z, W)] > (3/8) \cdot \mathbb{E}[(f(Z, W))^2]$ , then we know that:

$$\mathbb{E}[\log(1 + \lambda_* f(Z, W))] \leq \frac{\mathbb{E}[f(Z, W)]}{2}.$$

To bring it to a convenient form, we multiply the upper bound in (50) by two and get the bound (46), which completes the proof of the second assertion of the lemma.

□

### D.3 Proofs for Section 2

**Proposition 1.** Fix an arbitrary predictor  $g \in \mathcal{G}$ . The following claims hold:

1. For the misclassification risk, we have that:

$$\sup_{s \in [0, 1]} \left( \frac{1}{2} - R_m(sg) \right) = \left( \frac{1}{2} - R_m(g) \right) \vee 0 = \left( \frac{1}{2} \cdot \mathbb{E}[W \cdot \text{sign}[g(Z)]] \right) \vee 0. \quad (9)$$

2. For the squared risk, we have that:

$$\sup_{s \in [0, 1]} (1 - R_s(sg)) \geq (\mathbb{E}[W \cdot g(Z)] \vee 0) \cdot \left( \frac{\mathbb{E}[W \cdot g(Z)]}{\mathbb{E}[g^2(Z)]} \wedge 1 \right) \quad (10)$$

Further,  $d_s(P, Q) > 0$  if and only if there exists  $g \in \mathcal{G}$  such that  $\mathbb{E}[W \cdot g(Z)] > 0$ .

*Proof.* 1. The first equality in (9) follows from two facts: (a) for any  $g \in \mathcal{G}$  and any  $s \in (0, 1]$ , it holds that  $R_m(sg) = R_m(g)$ , (b)  $R_m(0) = 1/2$ . The second equality easily follows from the following fact:  $\text{sign}[x]/2 = 1/2 - \mathbb{1}\{x < 0\}$ .

2. Consider an arbitrary predictor  $g \in \mathcal{G}$ . Let us consider all possible scenarios:

611 (a) If  $\mathbb{E} [W \cdot g(Z)] \leq 0$ , then the RHS of (10) is zero. For the LHS of (10), we have that:

$$\sup_{s \in [0,1]} (1 - R_s(sg)) \geq 1 - R_s(0) = 0,$$

612 so the bound (10) holds.

613 (b) Next, assume that  $\mathbb{E} [W \cdot g(Z)] > 0$ , then it is easy to derive that:

$$s_\star := \arg \max_{s \in [0,1]} (1 - R_s(sg)) = \frac{\mathbb{E} [W \cdot g(Z)]}{\mathbb{E} [g^2(Z)]} \wedge 1. \quad (51)$$

614 A simple calculation shows that:

$$1 - R_s(s_\star g) \geq \mathbb{E} [W \cdot g(Z)] \cdot \left( \frac{\mathbb{E} [W \cdot g(Z)]}{\mathbb{E} [g^2(Z)]} \wedge 1 \right),$$

615 and hence, we conclude that the bound (10) holds.

616 To establish the second part of the statement, note that  $d_s(P, Q) > 0$  iff there is a predictor  
617  $g \in \mathcal{G}$  such that  $R_s(g) < 1$ . For the squared risk, we have:

$$1 - R_s(g) = 2\mathbb{E} [W \cdot g(Z)] - \mathbb{E} [g^2(Z)], \quad (52)$$

618 and hence,  $R_s(g) < 1$  trivially implies that  $\mathbb{E} [W \cdot g(Z)] > 0$ . The converse implication  
619 trivially follows from (10). Hence, the result follows.

620 □

621 **Theorem 1.** *The following claims hold:*

- 622 1. Suppose that  $H_0$  in (1a) is true. Then the oracle sequential test based on either  $(\mathcal{K}_t^{m,\star})_{t \geq 0}$   
623 or  $(\mathcal{K}_t^{s,\star})_{t \geq 0}$  ever stops with probability at most  $\alpha$ :  $\mathbb{P}_{H_0}(\tau < \infty) \leq \alpha$ .  
624 2. Suppose that  $H_1$  in (1b) is true. Then:

625 (a) The growth rate of the oracle wealth process  $(\mathcal{K}_t^{m,\star})_{t \geq 0}$  satisfies:

$$\liminf_{t \rightarrow \infty} \left( \frac{1}{t} \log \mathcal{K}_t^{m,\star} \right) \stackrel{\text{a.s.}}{\geq} \left( \frac{1}{2} - R_m(g_\star) \right)^2. \quad (14)$$

626 If  $R_m(g_\star) < 1/2$ , then the test based on  $(\mathcal{K}_t^{m,\star})_{t \geq 0}$  is consistent:  $\mathbb{P}_{H_1}(\tau < \infty) = 1$ .  
627 Further, the optimal growth rate achieved by  $\lambda_\star^m$  in (13) satisfies:

$$\mathbb{E} [\log(1 + \lambda_\star^m f_\star^m(Z, W))] \leq \left( \frac{16}{3} \cdot \left( \frac{1}{2} - R_m(g_\star) \right)^2 \wedge \left( \frac{1}{2} - R_m(g_\star) \right) \right). \quad (15)$$

628 (b) The growth rate of the oracle wealth process  $(\mathcal{K}_t^{s,\star})_{t \geq 0}$  satisfies:

$$\liminf_{t \rightarrow \infty} \left( \frac{1}{t} \log \mathcal{K}_t^{s,\star} \right) \stackrel{\text{a.s.}}{\geq} \frac{1}{4} \cdot \mathbb{E} [W \cdot g_\star(Z)]. \quad (16)$$

629 If  $\mathbb{E} [W \cdot g_\star(Z)] > 0$ , then the test based on  $(\mathcal{K}_t^{s,\star})_{t \geq 0}$  is consistent:  $\mathbb{P}_{H_1}(\tau < \infty) = 1$ .  
630 Further, the optimal growth rate achieved by  $\lambda_\star^s$  in (13) satisfies:

$$\mathbb{E} [\log(1 + \lambda_\star^s f_\star^s(Z, W))] \leq \frac{1}{2} \cdot \mathbb{E} [W \cdot g_\star(Z)]. \quad (17)$$

631 *Proof.* 1. We trivially have that the payoff functions (11a) and (11b) are bounded:  $\forall (z, w) \in$   
632  $\mathcal{Z} \times \{-1, 1\}$ , it holds that  $f_\star^m(z, w) \in [-1, 1]$  and  $f_\star^s(z, w) \in [-1, 1]$ . Further, under the null  
633  $H_0$  in (1a), it trivially holds that  $\mathbb{E}_{H_0} [f_\star^m(Z_t, W_t) \mid \mathcal{F}_{t-1}] = \mathbb{E}_{H_0} [f_\star^s(Z_t, W_t) \mid \mathcal{F}_{t-1}] = 0$ ,  
634 where  $\mathcal{F}_{t-1} = \sigma(\{(Z_i, W_i)\}_{i \leq t-1})$ . Since ONS betting fractions  $(\lambda_t^{\text{ONS}})_{t \geq 1}$  are pre-  
635 dictable, we conclude that the resulting wealth process is a nonnegative martingale. The  
636 assertion of the Theorem then follows directly from Ville's inequality (Proposition 2) when  
637  $a = 1/\alpha$ .

638 2. Suppose that  $H_1$  in (1b) is true. First, we prove the results for the lower bounds:

- (a) Consider the wealth process based on the misclassification risk  $(\mathcal{K}_t^{\text{m},*})_{t \geq 0}$ . Note that for all  $t \geq 1$ :

$$\mathbb{E} [f_\star^{\text{m}}(Z_t, W_t)] = 2 \cdot \left( \frac{1}{2} - R_{\text{m}}(g_\star) \right), \quad (f_\star^{\text{m}}(Z_t, W_t))^2 = 1.$$

Since  $\mathbb{E} [f_\star^{\text{m}}(Z_t, W_t)] \in [0, 1]$ , we also have  $(\mathbb{E} [f_\star^{\text{m}}(Z_t, W_t)])^2 \leq \mathbb{E} [f_\star^{\text{m}}(Z_t, W_t)]$ . From the first part of Lemma 6, it follows that:

$$\liminf_{t \rightarrow \infty} \frac{\log \mathcal{K}_t^{\text{m},*}}{t} \stackrel{\text{a.s.}}{\geq} \frac{1}{4} (\mathbb{E} [f_\star^{\text{m}}(Z_t, W_t)])^2 = \left( \frac{1}{2} - R_{\text{m}}(g_\star) \right)^2.$$

From the second part of Lemma 6, and (46) in particular, it follows that:

$$\mathbb{E} [\log (1 + \lambda_\star^{\text{m}} f_\star^{\text{m}}(Z, W))] \leq \left( \frac{16}{3} \cdot \left( \frac{1}{2} - R_{\text{m}}(g_\star) \right)^2 \wedge \left( \frac{1}{2} - R_{\text{m}}(g_\star) \right) \right).$$

The first term in the above is smaller or equal than the second one whenever  $R_{\text{m}}(g_\star) \geq 5/16$ . We conclude that the assertion of the theorem is true.

- (b) Next, we consider the wealth process based on the squared error:  $(\mathcal{K}_t^{\text{s},*})_{t \geq 0}$ . Note that:

$$\begin{aligned} \mathbb{E} [f_\star^{\text{s}}(Z_t, W_t)] &= \mathbb{E} [W \cdot g_\star(Z)], \\ \mathbb{E} [(f_\star^{\text{s}}(Z_t, W_t))^2] &= \mathbb{E} [g_\star^2(Z)], \end{aligned}$$

and hence from Lemma 6, it follows that:

$$\liminf_{t \rightarrow \infty} \frac{\log \mathcal{K}_t^{\text{s},*}}{t} \stackrel{\text{a.s.}}{\geq} \frac{1}{4} \left( \frac{(\mathbb{E} [W \cdot g_\star(Z)])^2}{\mathbb{E} [g_\star^2(Z)]} \wedge \mathbb{E} [W \cdot g_\star(Z)] \right). \quad (53)$$

In the above, we assume that the following case is not possible:  $g_\star(Z) \stackrel{\text{a.s.}}{=} 0$  (for such  $g_\star$ , the corresponding expected margin and the growth rate of the resulting wealth process are clearly zero, and will still be highlighted in our resulting bound). Next, note that since  $g_\star \in \arg \min_{g \in \mathcal{G}} R_{\text{s}}(g)$ , we have that:

$$1 - R_{\text{s}}(g_\star) = \sup_{s \in [0,1]} (1 - R_{\text{s}}(s g_\star)),$$

meaning that  $g_\star$  can not be improved by scaling with  $s < 1$ . From Proposition 1, and (51) in particular, it follows that:

$$\frac{\mathbb{E} [W \cdot g_\star(Z)]}{\mathbb{E} [g_\star^2(Z)]} \geq 1, \quad (54)$$

and hence, the bound (53) reduces to

$$\liminf_{t \rightarrow \infty} \frac{\log \mathcal{K}_t^{\text{s},*}}{t} \stackrel{\text{a.s.}}{\geq} \frac{\mathbb{E} [W \cdot g_\star(Z)]}{4}.$$

From the second part of Lemma 6, it follows that:

$$\mathbb{E} [\log (1 + \lambda_\star^{\text{s}} f_\star^{\text{s}}(Z, W))] \leq \frac{4}{3} \frac{(\mathbb{E} [W \cdot g_\star(Z)])^2}{\mathbb{E} [(g_\star(Z))^2]} \wedge \frac{\mathbb{E} [W \cdot g_\star(Z)]}{2}. \quad (55)$$

Next, we use that  $g_\star$  satisfies (54), which implies that the second term in (55) is smaller, and hence,

$$\mathbb{E} [\log (1 + \lambda_\star^{\text{s}} f_\star^{\text{s}}(Z, W))] \leq \frac{\mathbb{E} [W \cdot g_\star(Z)]}{2},$$

which concludes the proof of the second part of the theorem.  $\square$

660 **Corollary 1.** Consider an arbitrary  $g \in \mathcal{G}$  with nonnegative expected margin:  $\mathbb{E}[W \cdot g(Z)] \geq 0$ .  
 661 Then the growth rate of the corresponding wealth process  $(\mathcal{K}_t^s)_{t \geq 0}$  satisfies:

$$\liminf_{t \rightarrow \infty} \left( \frac{1}{t} \log \mathcal{K}_t^s \right) \stackrel{\text{a.s.}}{\geq} \frac{1}{4} \left( \sup_{s \in [0,1]} (1 - R_s(sg)) \wedge \mathbb{E}[W \cdot g(Z)] \right) \quad (18a)$$

$$\geq \frac{1}{4} (\mathbb{E}[W \cdot g(Z)])^2, \quad (18b)$$

662 and the optimal growth rate achieved by  $\lambda_\star^s$  in (13) satisfies:

$$\mathbb{E}[\log(1 + \lambda_\star^s f^s(Z, W))] \leq \left( \frac{4}{3} \cdot \sup_{s \in [0,1]} (1 - R_s(sg)) \right) \wedge \left( \frac{1}{2} \cdot \mathbb{E}[W \cdot g(Z)] \right). \quad (19)$$

663 *Proof.* Following the same argument as that of the proof of Theorem 1, we can deduce that:

$$\liminf_{t \rightarrow \infty} \frac{\log \mathcal{K}_t^s}{t} \stackrel{\text{a.s.}}{\geq} \frac{1}{4} \left( \frac{(\mathbb{E}[W \cdot g(Z)])^2}{\mathbb{E}[g^2(Z)]} \wedge \mathbb{E}[W \cdot g(Z)] \right). \quad (56)$$

664 Hence, it suffices to argue that the lower bound (56) is equivalent to (18a). Without loss of generality,  
 665 we can assume that  $\mathbb{E}[W \cdot g(Z)] \geq 0$ , and further, the two lower bounds are equal if  $\mathbb{E}[W \cdot g(Z)] =$   
 666 0. Hence, we consider the case when  $\mathbb{E}[W \cdot g(Z)] > 0$ . First, let us consider the case when

$$\frac{\mathbb{E}[W \cdot g(Z)]}{\mathbb{E}[g^2(Z)]} < 1. \quad (57)$$

667 Using (51), we get that:

$$\sup_{s \in [0,1]} (1 - R_s(sg)) = \frac{(\mathbb{E}[W \cdot g(Z)])^2}{\mathbb{E}[g^2(Z)]}, \quad (58)$$

668 and hence, two bounds coincide. For the upper bound (19), we use Lemma 6, and the upper bound (46)  
 669 in particular. Note that the first term in (46) is less than the second term whenever

$$\frac{\mathbb{E}[W \cdot g(Z)]}{\mathbb{E}[(g(Z))^2]} \leq \frac{3}{8} < 1.$$

670 However, in this regime we also know that (58) holds, and hence the two bounds coincide. This  
 671 completes the proof. □

673 **Theorem 2.** The following claims hold for Seq-C-2ST (Algorithm 2):

- 674 1. If  $H_0$  in (1a) is true, the test ever stops with probability at most  $\alpha$ :  $\mathbb{P}_{H_0}(\tau < \infty) \leq \alpha$ .
- 675 2. Suppose that  $H_1$  in (1b) is true. Then:
  - 676 (a) Under Assumption 1, the test with the payoff (22a) is consistent:  $\mathbb{P}_{H_1}(\tau < \infty) = 1$ .
  - 677 (b) Under Assumption 2, the test with the payoff (22b) is consistent:  $\mathbb{P}_{H_1}(\tau < \infty) = 1$ .

678 *Proof.* 1. We trivially have that the payoff functions (22a) and (22b) are bounded:  $\forall t \geq 1$   
 679 and  $\forall (z, w) \in \mathcal{Z} \times \{-1, 1\}$ , it holds that  $f_t^m(z, w) \in [-1, 1]$  and  $f_t^s(z, w) \in [-1, 1]$ .  
 680 Further, under the null  $H_0$  in (1a), it trivially holds that  $\mathbb{E}_{H_0}[f_t^m(Z_t, W_t) | \mathcal{F}_{t-1}] =$   
 681  $\mathbb{E}_{H_0}[f_t^s(Z_t, W_t) | \mathcal{F}_{t-1}] = 0$ , where  $\mathcal{F}_{t-1} = \sigma(\{(Z_i, W_i)\}_{i \leq t-1})$ . Since ONS betting  
 682 fractions  $(\lambda_t^{\text{ONS}})_{t \geq 1}$  are predictable, we conclude that the resulting wealth process is a  
 683 nonnegative martingale. The assertion of the Theorem then follows directly from Ville's  
 684 inequality (Proposition 2) when  $a = 1/\alpha$ .

685 2. Note that if ONS strategy for selecting betting fractions is deployed, then (49) implies that  
 686 the tests will be consistent as long as

$$\liminf_{t \rightarrow \infty} \frac{1}{t} \sum_{i=1}^t f_i \stackrel{\text{a.s.}}{>} 0, \quad (59)$$

687 where for  $i \geq 1$ ,  $f_i = f_i^m(Z_i, W_i)$  and  $f_i = f_i^s(Z_i, W_i)$  for the payoffs based on the  
 688 misclassification and the squared risks respectively.

689 (a) Recall that

$$f_i^m(Z_i, W_i) = W_i \cdot \text{sign}[g_i(Z_i)],$$

690 and Assumption 1 states that:

$$\limsup_{t \rightarrow \infty} \frac{1}{t} \sum_{i=1}^t \mathbb{1}\{W_i \cdot \text{sign}[g_i(Z_i)] < 0\} \stackrel{\text{a.s.}}{<} \frac{1}{2}.$$

691 Since  $\mathbb{1}\{x < 0\} = (1 - \text{sign}[x])/2$ , we get that:

$$\limsup_{t \rightarrow \infty} \frac{1}{t} \sum_{i=1}^t \left( \frac{1}{2} - \frac{W_i \cdot \text{sign}[g_i(Z_i)]}{2} \right) \stackrel{\text{a.s.}}{<} \frac{1}{2},$$

692 which, after rearranging and multiplying by two, implies that:

$$\liminf_{t \rightarrow \infty} \frac{1}{t} \sum_{i=1}^t W_i \cdot \text{sign}[g_i(Z_i)] \stackrel{\text{a.s.}}{>} 0.$$

693 Hence, a sufficient condition for consistency (59) holds, and we conclude that the result  
694 is true.

695 (b) Recall that

$$f_i^s(Z_i, W_i) = W_i \cdot g_i(Z_i),$$

696 and Assumption 2 states that:

$$\limsup_{t \rightarrow \infty} \frac{1}{t} \sum_{i=1}^t (g_i(Z_i) - W_i)^2 \stackrel{\text{a.s.}}{<} 1,$$

697 which is equivalent to

$$\limsup_{t \rightarrow \infty} \frac{1}{t} \sum_{i=1}^t (g_i^2(Z_i) - 2W_i \cdot g_i(Z_i)) \stackrel{\text{a.s.}}{<} 0.$$

698 It is easy to see that the above, in turn, implies that:

$$\liminf_{t \rightarrow \infty} \frac{1}{t} \sum_{i=1}^t W_i \cdot g_i(Z_i) \stackrel{\text{a.s.}}{>} 0.$$

699 Hence, a sufficient condition for consistency (59) holds, and we conclude that the result  
700 is true.

701

□

## 702 D.4 Proofs for Appendix A

703 **Theorem 3.** *The following claims hold for the oracle sequential regression-based IT based on*  
704  *$(\mathcal{K}_t^{r,*})_{t \geq 0}$ .*

- 705 1. *Suppose that  $H_0$  in (26a) is true. Then the test ever stops with probability at most  $\alpha$ :*  
706  $\mathbb{P}_{H_1}(\tau < \infty) \leq \alpha.$
- 707 2. *Suppose that  $H_1$  in (26b) is true. Further, suppose that:  $\mathbb{E}[W\ell(g_*(X), Y)] > 0$ . Then the*  
708 *test is consistent:  $\mathbb{P}_{H_1}(\tau < \infty) = 1$ .*

709 *Proof.* 1. We trivially have that the payoff function (27) is bounded:  $\forall(x, y, w) \in \mathcal{X} \times \mathcal{Y} \times$   
710  $\{-1, 1\}$ , it holds that  $f_*^r(x, y, w) \in [-1, 1]$ . Further, under the null  $H_0$  in (26a), it trivially  
711 holds that  $\mathbb{E}_{H_0}[f_*^r(X_t, Y_t, W_t) \mid \mathcal{F}_{t-1}] = 0$ , where  $\mathcal{F}_{t-1} = \sigma(\{(X_i, Y_i, W_i)\}_{i \leq t-1})$ . Since  
712 ONS betting fractions  $(\lambda_t^{\text{ONS}})_{t \geq 1}$  are predictable, we conclude that the resulting wealth  
713 process is a nonnegative martingale. The assertion of the Theorem then follows directly  
714 from Ville's inequality (Proposition 2) when  $a = 1/\alpha$ .



715 2. Note that if ONS strategy for selecting betting fractions is deployed, then (49) implies that  
 716 the tests will be consistent as long as

$$\liminf_{t \rightarrow \infty} \frac{1}{t} \sum_{i=1}^t f_{\star}^r(X_i, Y_i, W_i) \stackrel{\text{a.s.}}{>} 0. \quad (60)$$

717 Note that:

$$\frac{1}{t} \sum_{i=1}^t f_{\star}^r(X_i, Y_i, W_i) = \frac{1}{t} \sum_{i=1}^t \tanh(s_{\star} \cdot W_i \ell(g_{\star}(X_i), Y_i)) \xrightarrow{\text{a.s.}} \mathbb{E} [\tanh(s_{\star} \cdot W \ell(g_{\star}(X), Y))].$$

718 Note that for any  $x \in \mathbb{R} : \tanh(x) \geq x - \frac{1}{3} \cdot \max\{x^3, 0\}$ . Hence, for any  $s > 0$ , it holds  
 719 that:

$$\begin{aligned} \mathbb{E} [\tanh(s \cdot W \ell(g_{\star}(X), Y))] &\geq s \mathbb{E} [W \ell(g_{\star}(X), Y)] - \frac{1}{3} \mathbb{E} [\max\{s^3 \cdot W (\ell(g_{\star}(X), Y))^3, 0\}] \\ &= s \mathbb{E} [W \ell(g_{\star}(X), Y)] - \frac{s^3}{3} \mathbb{E} [(\ell(g_{\star}(X), Y))^3 \cdot \max\{W, 0\}] \\ &= s \mathbb{E} [W \ell(g_{\star}(X), Y)] - \frac{s^3}{6} \mathbb{E} [(1 + W) \cdot (\ell(g_{\star}(X), Y))^3], \end{aligned} \quad (61)$$

720 where we used that  $\max\{W, 0\} = (W + 1)/2$  since  $W \in \{-1, 1\}$ . Maximizing the RHS  
 721 of (61) over  $s > 0$  yields  $s_{\star}$  defined in (28a). Hence,

$$\begin{aligned} \mathbb{E} [\tanh(s_{\star} \cdot W \ell(g_{\star}(X), Y))] &\geq s_{\star} \mathbb{E} [W \ell(g_{\star}(X), Y)] - \frac{s_{\star}^3}{6} \mathbb{E} [(1 + W) \cdot (\ell(g_{\star}(X), Y))^3] \\ &= s_{\star} \left( \mathbb{E} [W \ell(g_{\star}(X), Y)] - \frac{s_{\star}^2}{6} \mathbb{E} [(1 + W) \cdot (\ell(g_{\star}(X), Y))^3] \right) \\ &= s_{\star} \left( \mathbb{E} [W \ell(g_{\star}(X), Y)] - \frac{1}{3} \mathbb{E} [W \ell(g_{\star}(X), Y)] \right) \\ &= \frac{2s_{\star}}{3} \mathbb{E} [W \ell(g_{\star}(X), Y)] > 0. \end{aligned}$$

722 Hence, we conclude that the oracle regression-based IT is consistent since the sufficient condition (62)  
 723 holds.  $\square$

724 **Theorem 4.** *The following claims hold for the proxy sequential regression-based IT (Algorithm 3):*

725 1. Suppose that  $H_0$  in (26a) is true. Then the test ever stops with probability at most  $\alpha$ :  
 726  $\mathbb{P}_{H_0}(\tau < \infty) \leq \alpha$ .

727 2. Suppose that  $H_1$  in (26b) is true. Further, suppose that Assumptions 3 and 4 are satisfied.  
 728 Then the test is consistent:  $\mathbb{P}_{H_1}(\tau < \infty) = 1$ .

729 *Proof.* 1. We trivially have that the payoff function (29) is bounded:  $\forall (x, y, w) \in \mathcal{X} \times \mathcal{Y} \times$   
 730  $\{-1, 1\}$ , it holds that  $f_t^r(x, y, w) \in [-1, 1]$ . Further, under the null  $H_0$  in (26a), it trivially  
 731 holds that  $\mathbb{E}_{H_0} [f_t^r(X_t, Y_t, W_t) \mid \mathcal{F}_{t-1}] = 0$ , where  $\mathcal{F}_{t-1} = \sigma(\{(X_i, Y_i, W_i)\}_{i \leq t-1})$ . Since  
 732 ONS betting fractions  $(\lambda_t^{\text{ONS}})_{t \geq 1}$  are predictable, we conclude that the resulting wealth  
 733 process is a nonnegative martingale. The assertion of the Theorem then follows directly  
 734 from Ville's inequality (Proposition 2) with  $a = 1/\alpha$ .

735 2. Note that if ONS strategy for selecting betting fractions is deployed, then (49) implies that  
 736 the tests will be consistent as long as

$$\liminf_{t \rightarrow \infty} \frac{1}{t} \sum_{i=1}^t f_t^r(X_i, Y_i, W_i) \stackrel{\text{a.s.}}{>} 0. \quad (62)$$

737 (a) **Step 1.** Consider a predictable sequence of scaling factors  $(s_t)_{t \geq 1}$ , defined in (30a),  
 738 and the corresponding sequences  $(\mu_t)_{t \geq 1}$  and  $(\nu_t)_{t \geq 1}$ , defined in (30b) and (30c)

respectively. For  $t \geq 1$ , let  $\mathcal{F}_t := \sigma(\{(X_i, Y_i, W_i)\}_{i \leq t})$ . Since the losses are bounded, we have that:

$$(W_i \cdot \ell(g(X_i; \theta_i), Y_i) - \mathbb{E}[W_i \cdot \ell(g(X_i; \theta_i), Y_i) \mid \mathcal{F}_{i-1}])_{i \geq 1},$$

is a bounded martingale difference sequence (BMDS). By the Strong Law of Large Numbers for BMDS, it follows that:

$$\frac{1}{t} \sum_{i=1}^t (W_i \cdot \ell(g(X_i; \theta_i), Y_i) - \mathbb{E}[W_i \cdot \ell(g(X_i; \theta_i), Y_i) \mid \mathcal{F}_{i-1}]) \xrightarrow{\text{a.s.}} 0.$$

Since  $((X_t, Y_t, W_t))_{t \geq 1}$  is a sequence of i.i.d. observations, we can write

$$\frac{1}{t} \sum_{i=1}^t \mathbb{E}[W_i \cdot \ell(g(X_i; \theta_i), Y_i) \mid \mathcal{F}_{i-1}] = \frac{1}{t} \sum_{i=1}^t \mathbb{E}[W \cdot \ell(g(X; \theta_i), Y) \mid \theta_i],$$

where  $(X, Y, W) \perp\!\!\!\perp (\theta_t)_{t \geq 1}, \theta_*$ . Using Assumption 3, we get that:

$$\begin{aligned} & \left| \frac{1}{t} \sum_{i=1}^t \mathbb{E}[W \cdot \ell(g(X; \theta_i), Y) \mid \theta_i] - \mathbb{E}[W \cdot \ell(g(X; \theta_*), Y) \mid \theta_*] \right| \\ & \leq \frac{1}{t} \sum_{i=1}^t \sup_{\substack{x \in \mathcal{X} \\ y \in \mathcal{Y}}} |\ell(g(x; \theta_i), y) - \ell(g(x; \theta_*), y)| \\ & \leq \frac{1}{t} \sum_{i=1}^t L_2 \sup_{x \in \mathcal{X}} |g(x; \theta_i) - g(x; \theta_*)| \\ & \leq \frac{1}{t} \sum_{i=1}^t L_2 \cdot L_1 \cdot \|\theta_i - \theta_*\| \xrightarrow{\text{a.s.}} 0, \end{aligned} \tag{63}$$

since  $\|\theta_i - \theta_*\| \xrightarrow{\text{a.s.}} 0$  by Assumption 4. In particular, this implies that  $\mu_t \xrightarrow{\text{a.s.}} \mathbb{E}[W \ell(g(X; \theta_*), Y) \mid \theta_*]$ . Similar argument can be used to show that  $\nu_t \xrightarrow{\text{a.s.}} \mathbb{E}[(1 + W) \cdot (\ell(g(X; \theta_*), Y))^3 \mid \theta_*]$ , and hence,

$$s_t \xrightarrow{\text{a.s.}} \sqrt{\frac{2 \mathbb{E}[W \ell(g(X; \theta_*), Y) \mid \theta_*]}{\mathbb{E}[(1 + W) \cdot (\ell(g(X; \theta_*), Y))^3 \mid \theta_*]}} =: s_*. \tag{64}$$

Note that  $s_*$  is a random variable which is positive (almost surely) by Assumption 4.

(b) **Step 2.** Recall that for any  $x \in \mathbb{R}$  :  $\tanh(x) \geq x - \frac{1}{3} \cdot \max\{x^3, 0\}$  and that  $\max\{W, 0\} = (W + 1)/2$  since  $W \in \{-1, 1\}$ . We have:

$$\begin{aligned} \frac{1}{t} \sum_{i=1}^t f_i^r(X_i, Y_i, W_i) &= \frac{1}{t} \sum_{i=1}^t \tanh(s_i \cdot W_i \ell(g(X_i; \theta_i), Y_i)) \\ &\geq \frac{1}{t} \sum_{i=1}^t \left( s_i \cdot W_i \cdot \ell(g(X_i; \theta_i), Y_i) - \frac{s_i^3}{6} \cdot (1 + W_i) \cdot (\ell(g(X_i; \theta_i), Y_i))^3 \right). \end{aligned}$$

Note that  $\theta_i$  and  $s_i$  are  $\mathcal{F}_{i-1}$ -measurable (see Step 1 for the definition of  $\mathcal{F}_{i-1}$ ). Under a minor technical assumption that  $(s_t)_{t \geq 1}$  is a sequence of bounded scaling factors (the lower bound is trivially zero and the upper bound also holds if  $\nu_t$  are bounded away from zero almost surely which is reasonable given the definition of  $\nu_t$ ), we can use analogous argument regarding a BMDS in Step 1 to deduce that:

$$\begin{aligned} & \liminf_{t \rightarrow \infty} \frac{1}{t} \sum_{i=1}^t f_i^r(X_i, Y_i, W_i) \\ & \geq \liminf_{t \rightarrow \infty} \frac{1}{t} \sum_{i=1}^t \left( s_i \cdot \mathbb{E}[W \cdot \ell(g(X; \theta_i), Y) \mid \theta_i] - \frac{s_i^3}{6} \mathbb{E}[(1 + W) \cdot (\ell(g(X; \theta_i), Y))^3 \mid \theta_i] \right). \end{aligned} \tag{65}$$

756

Using argument analogous to (63), we can show that:

$$\frac{1}{t} \sum_{i=1}^t \mathbb{E} [(1+W) \cdot (\ell(g(X; \theta_i), Y))^3 \mid \theta_i] \xrightarrow{\text{a.s.}} \mathbb{E} [(1+W) \cdot (\ell(g(X; \theta_\star), Y))^3 \mid \theta_\star]. \quad (66)$$

757

Combining (63), (64) and (66), we deduce that

$$\begin{aligned} & \frac{1}{t} \sum_{i=1}^t \left( s_i \cdot \mathbb{E} [W \cdot \ell(g(X; \theta_i), Y) \mid \theta_i] - \frac{s_i^3}{6} \mathbb{E} [(1+W) \cdot (\ell(g(X; \theta_i), Y))^3 \mid \theta_i] \right) \\ & \xrightarrow{\text{a.s.}} s_\star \cdot \mathbb{E} [W \cdot \ell(g(X; \theta_\star), Y) \mid \theta_\star] - \frac{s_\star^3}{6} \mathbb{E} [(1+W) \cdot (\ell(g(X; \theta_\star), Y))^3 \mid \theta_\star] \\ & = \frac{2s_\star}{3} \cdot \mathbb{E} [W \cdot \ell(g(X; \theta_\star), Y) \mid \theta_\star]. \end{aligned}$$

758

Hence, from (65) it follows that:

$$\liminf_{t \rightarrow \infty} \frac{1}{t} \sum_{i=1}^t f_i^f(X_i, Y_i, W_i) \geq \frac{2s_\star}{3} \cdot \mathbb{E} [W \cdot \ell(g(X; \theta_\star), Y) \mid \theta_\star],$$

759

where the RHS is a random variable which is positive almost surely. Hence, a sufficient condition for consistency (62) holds which concludes the proof.

760

761

□

## 762 D.5 Proofs for Appendix B

763 **Two-Sample Testing with Unbalanced Classes.** Note that  $(g(z) = 2\eta(z) - 1)$ :

$$\begin{aligned} & (1 - \lambda_t) \cdot 1 + \lambda_t \cdot \frac{(\eta(Z_t))^{\mathbb{1}\{W_t=1\}} (1 - \eta(Z_t))^{1-\mathbb{1}\{W_t=1\}}}{(\pi)^{\mathbb{1}\{W_t=1\}} (1 - \pi)^{1-\mathbb{1}\{W_t=1\}}} \\ & = (1 - \lambda_t) \cdot 1 + \lambda_t \cdot \frac{\left(\frac{1+g(Z_t)}{2}\right)^{\mathbb{1}\{W_t=1\}} \left(\frac{1-g(Z_t)}{2}\right)^{1-\mathbb{1}\{W_t=1\}}}{(\pi)^{\mathbb{1}\{W_t=1\}} (1 - \pi)^{1-\mathbb{1}\{W_t=1\}}} \\ & = (1 - \lambda_t) \cdot 1 + \frac{\lambda_t}{2} \cdot \frac{(1 + g(Z_t))^{\mathbb{1}\{W_t=1\}} (1 - g(Z_t))^{1-\mathbb{1}\{W_t=1\}}}{(\pi)^{\mathbb{1}\{W_t=1\}} (1 - \pi)^{1-\mathbb{1}\{W_t=1\}}} \\ & = (1 - \lambda_t) \cdot 1 + \frac{\lambda_t}{2} \cdot \frac{1 + W_t g(Z_t)}{(\pi)^{\mathbb{1}\{W_t=1\}} (1 - \pi)^{1-\mathbb{1}\{W_t=1\}}} \\ & = (1 - \lambda_t) \cdot 1 + \frac{\lambda_t}{2} \cdot \frac{2}{1 + W_t(2\pi - 1)} \cdot (1 + W_t g(Z_t)) \\ & = (1 - \lambda_t) \cdot 1 + \frac{\lambda_t}{1 + W_t(2\pi - 1)} \cdot (1 + W_t g(Z_t)) \\ & = 1 + \lambda_t \cdot \frac{W_t (g(Z_t) - (2\pi - 1))}{1 + W_t(2\pi - 1)}. \end{aligned}$$

764

**Payoff for the Case of Unbalanced Classes (known  $\pi$ ).** To see that the payoff function (37) is

765

lower bounded by negative one, note that:

$$\begin{aligned} f_t^u(z, 1) &= \frac{g_t(z) - (2\pi - 1)}{2\pi} \geq \frac{-1 - (2\pi - 1)}{2\pi} = -1, \\ f_t^u(z, -1) &= \frac{-g_t(z) + (2\pi - 1)}{2(1 - \pi)} \geq \frac{-1 + (2\pi - 1)}{2(1 - \pi)} = -1. \end{aligned}$$

766

To see that such payoff is fair, note that:

$$\mathbb{E}_{H_0} [f_t^u(Z_t, W_t) \mid \mathcal{F}_{t-1}] = \mathbb{E}_P \left[ \pi \cdot \frac{g_t(Z_t) - (2\pi - 1)}{2\pi} \right] - \mathbb{E}_Q \left[ (1 - \pi) \cdot \frac{g_t(Z_t) - (2\pi - 1)}{2(1 - \pi)} \mid \mathcal{F}_{t-1} \right] = 0,$$

767

where  $\mathcal{F}_{t-1} = \sigma(\{(Z_i, W_i)\}_{i \leq t-1})$ .

768 **Theorem 5.** Suppose that  $H_0$  in (35a) is true. Then  $(\mathcal{K}_t^u)_{t \geq 0}$  is a nonnegative supermartingale  
 769 adapted to  $(\mathcal{F}_t)_{t \geq 0}$ . Hence, the sequential 2ST based on  $(\mathcal{K}_t^u)_{t \geq 0}$  satisfies:  $\mathbb{P}_{H_0}(\tau < \infty) \leq \alpha$ .

770 *Proof.* First, we show that  $(\mathcal{K}_t^u)_{t \geq 0}$  is a nonnegative supermartingale. For any  $t \geq 1$ , the wealth  
 771  $\mathcal{K}_{t-1}$  is multiplied at round  $t$  by

$$1 + \lambda_t f_t^u \left( \{ (Z_{b(t-1)+i}, W_{b(t-1)+i}) \}_{i \in \{1, \dots, b\}} \right) = (1 - \lambda_t) \cdot 1 + \lambda_t \cdot \frac{\prod_{i=b(t-1)+1}^{bt} (1 + W_i g_t(Z_i))}{\prod_{i=1}^b (1 + W_i (2\hat{\pi}_t - 1))}.$$

772 Since  $\lambda_t \in [0, 0.5]$ , we conclude that the process  $(\mathcal{K}_t^u)_{t \geq 0}$  is nonnegative. Next, note that since  $\hat{\pi}_t$  is  
 773 the MLE of  $\pi$  computed from a  $t$ -th minibatch, it follows that:

$$\begin{aligned} 1 + \lambda_t f_t^u \left( \{ (Z_{b(t-1)+i}, W_{b(t-1)+i}) \}_{i \in \{1, \dots, b\}} \right) &\leq (1 - \lambda_t) \cdot 1 + \lambda_t \cdot \frac{\prod_{i=b(t-1)+1}^{bt} (1 + W_i g_t(Z_i))}{\prod_{i=b(t-1)+1}^{bt} (1 + W_i (2\pi - 1))} \\ &= (1 - \lambda_t) \cdot 1 + \lambda_t \cdot \prod_{i=b(t-1)+1}^{bt} \left( \frac{1 + W_i g_t(Z_i)}{1 + W_i (2\pi - 1)} \right). \end{aligned}$$

774 Recall that  $\mathcal{F}_{t-1} = \sigma(\{Z_i, W_i\}_{i \leq b(t-1)})$ . It suffices to show that if  $H_0$  is true, then

$$\mathbb{E}_{H_0} \left[ \prod_{i=b(t-1)+1}^{bt} \left( \frac{1 + W_i g_t(Z_i)}{1 + W_i (2\pi - 1)} \right) \mid \mathcal{F}_{t-1} \right] = 1.$$

775 Note that the individual terms in the above product are independent conditional on  $\mathcal{F}_{t-1}$ . Hence,

$$\mathbb{E}_{H_0} \left[ \prod_{i=b(t-1)+1}^{bt} \left( \frac{1 + W_i g_t(Z_i)}{1 + W_i (2\pi - 1)} \right) \mid \mathcal{F}_{t-1} \right] = \prod_{i=b(t-1)+1}^{bt} \mathbb{E}_{H_0} \left[ \frac{1 + W_i g_t(Z_i)}{1 + W_i (2\pi - 1)} \mid \mathcal{F}_{t-1} \right].$$

776 For any  $i \in \{b(t-1)+1, \dots, bt\}$ , it holds that:

$$\begin{aligned} \mathbb{E}_{H_0} \left[ \frac{1 + W_i g_t(Z_i)}{1 + W_i (2\pi - 1)} \mid \mathcal{F}_{t-1} \right] &= \mathbb{E}_{H_0} \left[ \pi \cdot \frac{1 + g_t(Z_i)}{1 + (2\pi - 1)} + (1 - \pi) \cdot \frac{1 - g_t(Z_i)}{1 - (2\pi - 1)} \mid \mathcal{F}_{t-1} \right] \\ &= \mathbb{E}_{H_0} \left[ \frac{1 + g_t(Z_i)}{2} + \frac{1 - g_t(Z_i)}{2} \mid \mathcal{F}_{t-1} \right] \\ &= 1. \end{aligned}$$

777 Hence, we conclude that  $(\mathcal{K}_t^u)_{t \geq 0}$  is a nonnegative supermartingale adapted to  $(\mathcal{F}_t)_{t \geq 0}$ . The time-  
 778 uniform type I error control of the resulting test then follows from Ville's inequality (Proposition 2).  
 779  $\square$

## 780 E Additional Experiments and Details

### 781 E.1 Modeling Details

782 **CNN Architecture and Training.** We use CNN with 4 convolutional layers (kernel size is taken  
 783 to be  $3 \times 3$ ) and 16, 32, 32, 64 filters respectively. Further, each convolutional layer is followed by  
 784 max-pooling layer ( $2 \times 2$ ). After flattening, those layers are followed by 1 fully connected layer  
 785 with 128 neurons. Dropout ( $p = 0.5$ ) and early stopping (with patience equal to ten epochs and 20%  
 786 of data used in the validation set) is used for regularization. ReLU activation functions are used  
 787 in each layer. Adam optimizer is used for training the network. We start training after processing  
 788 twenty observations, and update the model parameters after processing every next ten observations.  
 789 Maximum number of epochs is set to 25 for each training iteration. The batch size is set to 32.

790 **Single-stream Sequential Kernelized 2ST.** The construction of this test is the extension of 2ST  
 791 of Shekhar and Ramdas [2021] to the case when at each round an observation only from a single  
 792 distribution ( $P$  or  $Q$ ) is revealed. Let  $\mathcal{G}$  denote an RKHS with positive-definite kernel  $k$  and canonical  
 793 feature map  $\varphi(\cdot)$  defined on  $\mathcal{Z}$ . Recall that instances from  $P$  are labeled as  $+1$  and instances from  $Q$   
 794 are labeled as  $-1$  (characterized by  $W$ ). The mean embeddings of  $P$  and  $Q$  are then defined as

$$\hat{\mu}_P^{(t)} = \frac{1}{N_+(t)} \sum_{i=1}^t \varphi(Z_i) \cdot \mathbb{1}\{W_i = +1\},$$

$$\hat{\mu}_Q^{(t)} = \frac{1}{N_-(t)} \sum_{i=1}^t \varphi(Z_i) \cdot \mathbb{1}\{W_i = -1\},$$

795 where  $N_+(t) = |\{i \leq t : W_i = +1\}|$  and  $N_-(t) = |\{i \leq t : W_i = -1\}|$ . The corresponding payoff  
 796 function is

$$f_t^k(Z_{t+1}, W_{t+1}) = W_{t+1} \cdot \hat{g}_t(Z_{t+1}),$$

$$\text{where } \hat{g}_t = \frac{\hat{\mu}_P^{(t)} - \hat{\mu}_Q^{(t)}}{\|\hat{\mu}_P^{(t)} - \hat{\mu}_Q^{(t)}\|_{\mathcal{G}}}.$$

797 To make the test computationally efficient, it is critical to update the normalization constant efficiently.  
 798 Suppose that at round  $t + 1$ , an instance from  $P$  is observed. In this case,  $\hat{\mu}_Q^{(t+1)} = \hat{\mu}_Q^{(t)}$ . Note that:

$$\begin{aligned} \hat{\mu}_P^{(t+1)} &= \frac{1}{N_+(t+1)} \sum_{i=1}^{t+1} \varphi(Z_i) \cdot \mathbb{1}\{W_i = +1\} \\ &= \frac{1}{N_+(t) + 1} \sum_{i=1}^{t+1} \varphi(Z_i) \cdot \mathbb{1}\{W_i = +1\} \\ &= \frac{1}{N_+(t) + 1} \varphi(Z_{t+1}) + \frac{1}{N_+(t) + 1} \sum_{i=1}^t \varphi(Z_i) \cdot \mathbb{1}\{W_i = +1\} \\ &= \frac{1}{N_+(t) + 1} \varphi(Z_{t+1}) + \frac{N_+(t)}{N_+(t) + 1} \hat{\mu}_P^{(t)}. \end{aligned}$$

799 Hence, we have:

$$\begin{aligned} \|\hat{\mu}_P^{(t+1)} - \hat{\mu}_Q^{(t+1)}\|_{\mathcal{G}}^2 &= \|\hat{\mu}_P^{(t+1)} - \hat{\mu}_Q^{(t)}\|_{\mathcal{G}}^2 \\ &= \|\hat{\mu}_P^{(t+1)}\|_{\mathcal{G}}^2 - 2 \langle \hat{\mu}_P^{(t+1)}, \hat{\mu}_Q^{(t)} \rangle_{\mathcal{G}} + \|\hat{\mu}_Q^{(t)}\|_{\mathcal{G}}^2. \end{aligned}$$

800 In particular,

$$\begin{aligned} \langle \hat{\mu}_P^{(t+1)}, \hat{\mu}_Q^{(t)} \rangle_{\mathcal{G}} &= \left\langle \frac{1}{N_+(t) + 1} \varphi(Z_{t+1}) + \frac{N_+(t)}{N_+(t) + 1} \hat{\mu}_P^{(t)}, \hat{\mu}_Q^{(t)} \right\rangle_{\mathcal{G}} \\ &= \frac{1}{N_+(t) + 1} \langle \varphi(Z_{t+1}), \hat{\mu}_Q^{(t)} \rangle_{\mathcal{G}} + \frac{N_+(t)}{N_+(t) + 1} \langle \hat{\mu}_P^{(t)}, \hat{\mu}_Q^{(t)} \rangle_{\mathcal{G}}. \end{aligned}$$

801 Note that:

$$\langle \varphi(Z_{t+1}), \hat{\mu}_Q^{(t)} \rangle_{\mathcal{G}} = \frac{1}{N_-(t)} \sum_{i=1}^t k(Z_{t+1}, Z_i) \cdot \mathbb{1}\{W_i = -1\}.$$

802 Next, we assume for simplicity that  $k(x, x) = 1, \forall x$  which holds for RBF kernel. Observe that:

$$\begin{aligned} \|\hat{\mu}_P^{(t+1)}\|_{\mathcal{G}}^2 &= \langle \hat{\mu}_P^{(t+1)}, \hat{\mu}_P^{(t+1)} \rangle_{\mathcal{G}} \\ &= \frac{1}{(N_+(t) + 1)^2} + \frac{2N_+(t)}{(N_+(t) + 1)^2} \langle \varphi(Z_{t+1}), \hat{\mu}_P^{(t)} \rangle_{\mathcal{G}} + \frac{(N_+(t))^2}{(N_+(t) + 1)^2} \|\hat{\mu}_P^{(t)}\|_{\mathcal{G}}^2. \end{aligned}$$

803 By caching intermediate results, we can compute the normalization constant using linear in  $t$  number  
 804 of kernel evaluations. We start betting once at least one instance is observed from both  $P$  and  $Q$ .  
 805 For simulations, we use RBF kernel and the median heuristic with first 20 instances to compute the  
 806 kernel hyperparameter.

**MLP Training Scheme** We begin training after processing twenty datapoints from  $P_{XY}$  which gives a training dataset with 40 datapoints (due to randomization). When updating a model, we use previous parameters as initialization. We use the following update scheme: we start after next  $n_0 = 10$  datapoints from  $P_{XY}$  are observed. Once  $n_0$  becomes less than 1% of the size of the existing training dataset, we increase it by ten, that is,  $n_t = n_{t-1} + 10$ . When we fit the model, we set the maximum number of epochs to be 25 and use early stopping with patience of 3 epochs.

**Kernel Hyperparameters for Synthetic Experiments.** For SKIT, we use RBF kernels:

$$k(x, x') = \exp\left(-\lambda_X \|x - x'\|_2^2\right), \quad l(y, y') = \exp\left(-\lambda_Y \|y - y'\|_2^2\right).$$

For simulations on synthetic data, we take kernel hyperparameters to be inversely proportional to the second moment of the underlying variables (the median heuristic yields similar results):

$$\lambda_X = \frac{1}{2\mathbb{E}[\|X - X'\|_2^2]}, \quad \lambda_Y = \frac{1}{2\mathbb{E}[\|Y - Y'\|_2^2]}.$$

1. *Spherical model.* By symmetry, we have:  $P_X = P_Y$ , and hence we take  $\lambda_X = \lambda_Y$ . We have

$$\mathbb{E}[(X - X')^2] = 2\mathbb{E}[X^2] = \frac{2}{d}.$$

2. *HTDD model.* By symmetry, we have:  $P_X = P_Y$ , and hence we take  $\lambda_X = \lambda_Y$ . We have

$$\mathbb{E}[(X - X')^2] = 2\mathbb{E}[X^2] = \frac{2\pi^2}{3}.$$

3. *Sparse signal model.* We have

$$\begin{aligned} \mathbb{E}[\|X - X'\|_2^2] &= 2\mathbb{E}[\|X\|_2^2] = 4d, \\ \mathbb{E}[\|Y - Y'\|_2^2] &= 2\mathbb{E}[\|Y\|_2^2] = 2\text{tr}(B_s B_s^\top + I_d) = 2(d + \sum_{i=1}^d \beta_i^2). \end{aligned}$$

4. *Gaussian model.* We have

$$\begin{aligned} \mathbb{E}[(X - X')^2] &= 2\mathbb{E}[X^2] = 2, \\ \mathbb{E}[(Y - Y')^2] &= 2\mathbb{E}[Y^2] = 2(1 + \beta^2). \end{aligned}$$

**Ridge Regression.** We use ridge regression as an underlying predictive model:  $\hat{g}_t(x) = \beta_0^{(t)} + x\beta_1^{(t)}$ , where the coefficients are obtained by solving:

$$(\beta_0^{(t)}, \beta_1^{(t)}) = \arg \min_{\beta_0, \beta_1} \sum_{i=1}^{2(t-1)} (Y_i - X_i \beta_1 - \beta_0)^2 + \lambda \beta_1^2.$$

Let  $\Gamma = \text{diag}(0, 1)$ . Let  $\mathbf{X}_{t-1} \in \mathbb{R}^{2(t-1) \times 2}$  be such that  $(\mathbf{X}_{t-1})_i = (1, X_i)$ ,  $i \in [1, 2(t-1)]$ . Finally, let  $\mathbf{Y}_{t-1}$  be a vector of responses:  $(\mathbf{Y}_{t-1})_i = Y_i$ ,  $i \in [1, 2(t-1)]$ . Then:

$$\beta^{(t)} = \arg \min_{\beta} \|\mathbf{Y}_{t-1} - \mathbf{X}_{t-1} \beta\|^2 + \lambda \beta^\top \Gamma \beta = (\mathbf{X}_{t-1}^\top \mathbf{X}_{t-1} + \lambda \Gamma)^{-1} (\mathbf{X}_{t-1}^\top \mathbf{Y}_{t-1}).$$

## E.2 Additional Experiments for Seq-C-IT

In Figure 6, we present average stopping times for ITs under the synthetic settings from Section 3. We confirm that all tests adapt to the complexity of a problem at hand, stopping earlier on easy tasks and later on harder ones. We also consider two additional synthetic examples where Seq-C-IT outperforms a kernelized approach:

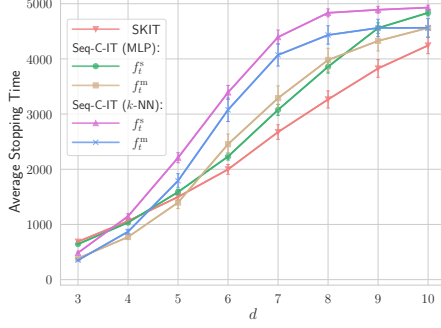

(a) Spherical model.

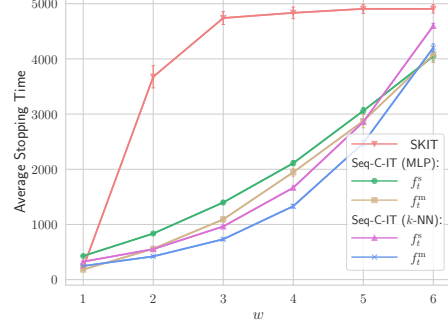

(b) HTDD model.

Figure 6: Stopping times of ITs on synthetic data from Section 3. Subplot (a) shows that SKIT is only marginally better than Seq-C-IT (MLP) due to slightly better sample efficiency under the spherical model (no localized dependence). Under the structured HTDD model, SKIT is inferior to Seq-C-ITs.

829 1. *Sparse signal model.* Let  $(X_t)_{t \geq 1}$  and  $(\varepsilon_t)_{t \geq 1}$  be two independent sequences of standard  
830 Gaussian random vectors in  $\mathbb{R}^d$ :  $X_t, \varepsilon_t \stackrel{\text{iid}}{\sim} \mathcal{N}(0, \mathbf{I}_d)$ ,  $t \geq 1$ . We take

$$(X_t, Y_t) = (X_t, B_s X_t + \varepsilon_t),$$

831 where  $B_s = \text{diag}(\beta_1, \dots, \beta_d)$  and only  $s = 5$  of  $\{\beta_i\}_{i=1}^d$  are nonzero being sampled from  
832  $\text{Unif}([-0.5, 0.5])$ . We consider  $d \in \{5, \dots, 50\}$ .

833 2. *Nested circles model.* Let  $(L_t)_{t \geq 1}$ ,  $(\Theta_t)_{t \geq 1}$ ,  $(\varepsilon_t^{(1)})_{t \geq 1}$ ,  $(\varepsilon_t^{(2)})_{t \geq 1}$  denote sequences of ran-  
834 dom variables where  $L \stackrel{\text{iid}}{\sim} \text{Unif}(1, \dots, l)$  for some prespecified  $l \in \mathbb{N}$ ,  $\Theta_t \stackrel{\text{iid}}{\sim} \text{Unif}([0, 2\pi])$ ,  
835 and  $\varepsilon_t^{(1)}, \varepsilon_t^{(2)} \stackrel{\text{iid}}{\sim} \mathcal{N}(0, (1/4)^2)$ . For  $t \geq 1$ , we take

$$(X_t, Y_t) = (L_t \cos(\Theta_t) + \varepsilon_t^{(1)}, L_t \sin(\Theta_t) + \varepsilon_t^{(2)}). \quad (67)$$

836 We consider  $l \in \{1, \dots, 10\}$ .

837 In Figure 7, we show that Seq-C-ITs significantly outperform SKIT under these models. We note that  
838 the degrading performance of kernel-based tests under the nested circles model (67) has been also  
839 observed in earlier works [Berrett and Samworth, 2019, Podkopaev et al., 2023].

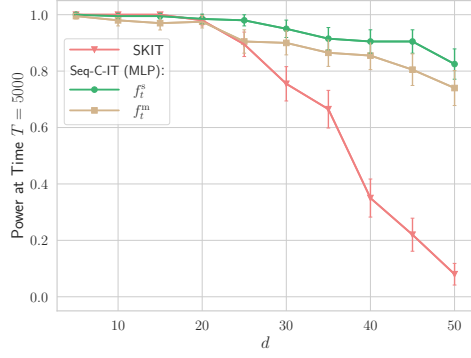

(a) Sparse signal model.

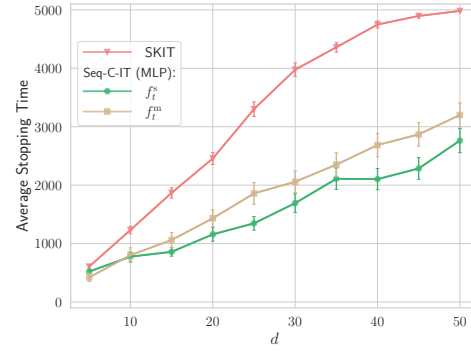

(b) Sparse signal model.

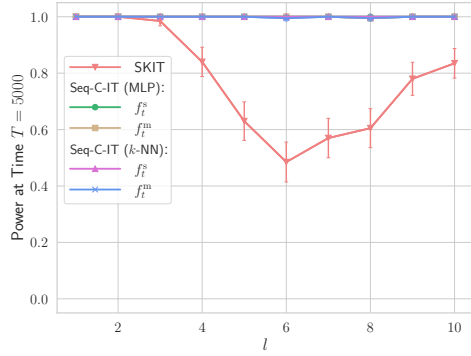

(c) Nested circles model.

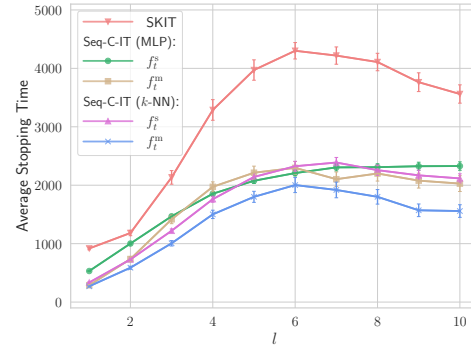

(d) Nested circles model.

Figure 7: Rejection rates (left column) and average stopping times (right column) of sequential ITs for synthetic datasets from Appendix E.2. In both cases, SKIT is inferior to Seq-C-ITs.
